# Supplementary material
Source: Preprints.org preprint supplement (doi:10.20944/preprints202004.0268.v1)
Supplement: Supplementary file 1 [file supplementary]

## Sheet: ST1
Supplementary Table 1. RNA-seq data collected in this study
Sample	Tissue	Download_path	Librarylayout
ERR2281864	adipose	https://sra-downloadb.be-md.ncbi.nlm.nih.gov/sos2/sra-pub-run-13/ERR2281864/ERR2281864.1	PAIRED
ERR2281866	adipose	https://sra-downloadb.be-md.ncbi.nlm.nih.gov/sos2/sra-pub-run-13/ERR2281866/ERR2281866.1	PAIRED
ERR2281867	adipose	https://sra-downloadb.be-md.ncbi.nlm.nih.gov/sos2/sra-pub-run-13/ERR2281867/ERR2281867.1	PAIRED
ERR2281868	adipose	https://sra-downloadb.be-md.ncbi.nlm.nih.gov/sos2/sra-pub-run-13/ERR2281868/ERR2281868.1	PAIRED
ERR2281869	adipose	https://sra-downloadb.be-md.ncbi.nlm.nih.gov/sos2/sra-pub-run-13/ERR2281869/ERR2281869.1	PAIRED
ERR2281870	adipose	https://sra-downloadb.be-md.ncbi.nlm.nih.gov/sos2/sra-pub-run-13/ERR2281870/ERR2281870.1	PAIRED
ERR2281872	adipose	https://sra-downloadb.be-md.ncbi.nlm.nih.gov/sos2/sra-pub-run-13/ERR2281872/ERR2281872.1	PAIRED
ERR2281873	adipose	https://sra-downloadb.be-md.ncbi.nlm.nih.gov/sos2/sra-pub-run-13/ERR2281873/ERR2281873.1	PAIRED
ERR2281874	adipose	https://sra-downloadb.be-md.ncbi.nlm.nih.gov/sos2/sra-pub-run-13/ERR2281874/ERR2281874.1	PAIRED
ERR2281875	adipose	https://sra-downloadb.be-md.ncbi.nlm.nih.gov/sos2/sra-pub-run-13/ERR2281875/ERR2281875.1	PAIRED
ERR2281876	adipose	https://sra-downloadb.be-md.ncbi.nlm.nih.gov/sos2/sra-pub-run-13/ERR2281876/ERR2281876.1	PAIRED
ERR2281877	adipose	https://sra-downloadb.be-md.ncbi.nlm.nih.gov/sos2/sra-pub-run-13/ERR2281877/ERR2281877.1	PAIRED
ERR2281878	adipose	https://sra-downloadb.be-md.ncbi.nlm.nih.gov/sos2/sra-pub-run-13/ERR2281878/ERR2281878.1	PAIRED
ERR2281879	adipose	https://sra-downloadb.be-md.ncbi.nlm.nih.gov/sos2/sra-pub-run-13/ERR2281879/ERR2281879.1	PAIRED
ERR2281880	adipose	https://sra-downloadb.be-md.ncbi.nlm.nih.gov/sos2/sra-pub-run-13/ERR2281880/ERR2281880.1	PAIRED
ERR2281881	adipose	https://sra-downloadb.be-md.ncbi.nlm.nih.gov/sos2/sra-pub-run-13/ERR2281881/ERR2281881.1	PAIRED
ERR2281882	adipose	https://sra-downloadb.be-md.ncbi.nlm.nih.gov/sos2/sra-pub-run-13/ERR2281882/ERR2281882.1	PAIRED
ERR2281883	adipose	https://sra-downloadb.be-md.ncbi.nlm.nih.gov/sos2/sra-pub-run-13/ERR2281883/ERR2281883.1	PAIRED
ERR2281884	adipose	https://sra-downloadb.be-md.ncbi.nlm.nih.gov/sos2/sra-pub-run-13/ERR2281884/ERR2281884.1	PAIRED
ERR2281885	adipose	https://sra-downloadb.be-md.ncbi.nlm.nih.gov/sos2/sra-pub-run-13/ERR2281885/ERR2281885.1	PAIRED
ERR2281887	adipose	https://sra-downloadb.be-md.ncbi.nlm.nih.gov/sos2/sra-pub-run-13/ERR2281887/ERR2281887.1	PAIRED
ERR2281894	adipose	https://sra-downloadb.be-md.ncbi.nlm.nih.gov/sos2/sra-pub-run-13/ERR2281894/ERR2281894.1	PAIRED
ERR2281895	adipose	https://sra-downloadb.be-md.ncbi.nlm.nih.gov/sos2/sra-pub-run-13/ERR2281895/ERR2281895.1	PAIRED
ERR2281896	adipose	https://sra-downloadb.be-md.ncbi.nlm.nih.gov/sos2/sra-pub-run-13/ERR2281896/ERR2281896.1	PAIRED
ERR2281897	adipose	https://sra-downloadb.be-md.ncbi.nlm.nih.gov/sos2/sra-pub-run-13/ERR2281897/ERR2281897.1	PAIRED
ERR315332	adipose	https://sra-downloadb.be-md.ncbi.nlm.nih.gov/sos1/sra-pub-run-5/ERR315332/ERR315332.1	PAIRED
ERR315342	adipose	https://sra-downloadb.be-md.ncbi.nlm.nih.gov/sos1/sra-pub-run-5/ERR315342/ERR315342.1	PAIRED
ERR315343	adipose	https://sra-downloadb.be-md.ncbi.nlm.nih.gov/sos1/sra-pub-run-5/ERR315343/ERR315343.1	PAIRED
ERR315378	adipose	https://sra-downloadb.be-md.ncbi.nlm.nih.gov/sos1/sra-pub-run-5/ERR315378/ERR315378.1	PAIRED
SRR5171082	adipose	https://sra-downloadb.be-md.ncbi.nlm.nih.gov/sos2/sra-pub-run-9/SRR5171082/SRR5171082.1	PAIRED
SRR5171083	adipose	https://sra-downloadb.be-md.ncbi.nlm.nih.gov/sos2/sra-pub-run-9/SRR5171083/SRR5171083.1	PAIRED
SRR5388843	adipose	https://sra-downloadb.be-md.ncbi.nlm.nih.gov/sos2/sra-pub-run-7/SRR5388843/SRR5388843.1	PAIRED
SRR5388844	adipose	https://sra-downloadb.be-md.ncbi.nlm.nih.gov/sos2/sra-pub-run-7/SRR5388844/SRR5388844.1	PAIRED
SRR5388845	adipose	https://sra-downloadb.be-md.ncbi.nlm.nih.gov/sos2/sra-pub-run-7/SRR5388845/SRR5388845.1	PAIRED
SRR5388846	adipose	https://sra-downloadb.be-md.ncbi.nlm.nih.gov/sos2/sra-pub-run-7/SRR5388846/SRR5388846.1	PAIRED
SRR5388847	adipose	https://sra-downloadb.be-md.ncbi.nlm.nih.gov/sos2/sra-pub-run-7/SRR5388847/SRR5388847.1	PAIRED
SRR5388848	adipose	https://sra-downloadb.be-md.ncbi.nlm.nih.gov/sos2/sra-pub-run-7/SRR5388848/SRR5388848.1	PAIRED
SRR6454663	adipose	https://sra-downloadb.be-md.ncbi.nlm.nih.gov/sos2/sra-pub-run-13/SRR6454663/SRR6454663.1	PAIRED
SRR6454664	adipose	https://sra-downloadb.be-md.ncbi.nlm.nih.gov/sos2/sra-pub-run-13/SRR6454664/SRR6454664.1	PAIRED
SRR6454670	adipose	https://sra-downloadb.be-md.ncbi.nlm.nih.gov/sos2/sra-pub-run-13/SRR6454670/SRR6454670.1	PAIRED
ERR1473027	brain	https://sra-downloadb.be-md.ncbi.nlm.nih.gov/sos2/sra-pub-run-9/ERR1473027/ERR1473027.1	PAIRED
ERR1473028	brain	https://sra-downloadb.be-md.ncbi.nlm.nih.gov/sos2/sra-pub-run-9/ERR1473028/ERR1473028.1	PAIRED
ERR1473029	brain	https://sra-downloadb.be-md.ncbi.nlm.nih.gov/sos2/sra-pub-run-9/ERR1473029/ERR1473029.1	PAIRED
ERR1473030	brain	https://sra-downloadb.be-md.ncbi.nlm.nih.gov/sos2/sra-pub-run-9/ERR1473030/ERR1473030.1	PAIRED
ERR1473031	brain	https://sra-downloadb.be-md.ncbi.nlm.nih.gov/sos2/sra-pub-run-9/ERR1473031/ERR1473031.1	PAIRED
ERR1473032	brain	https://sra-downloadb.be-md.ncbi.nlm.nih.gov/sos2/sra-pub-run-9/ERR1473032/ERR1473032.1	PAIRED
ERR1473033	brain	https://sra-downloadb.be-md.ncbi.nlm.nih.gov/sos2/sra-pub-run-9/ERR1473033/ERR1473033.3	PAIRED
ERR1473034	brain	https://sra-downloadb.be-md.ncbi.nlm.nih.gov/sos2/sra-pub-run-9/ERR1473034/ERR1473034.3	PAIRED
ERR1473035	brain	https://sra-downloadb.be-md.ncbi.nlm.nih.gov/sos2/sra-pub-run-9/ERR1473035/ERR1473035.1	PAIRED
ERR1473036	brain	https://sra-downloadb.be-md.ncbi.nlm.nih.gov/sos2/sra-pub-run-9/ERR1473036/ERR1473036.1	PAIRED
ERR1473037	brain	https://sra-downloadb.be-md.ncbi.nlm.nih.gov/sos2/sra-pub-run-9/ERR1473037/ERR1473037.3	PAIRED
ERR1473038	brain	https://sra-downloadb.be-md.ncbi.nlm.nih.gov/sos2/sra-pub-run-9/ERR1473038/ERR1473038.1	PAIRED
ERR1473039	brain	https://sra-downloadb.be-md.ncbi.nlm.nih.gov/sos2/sra-pub-run-9/ERR1473039/ERR1473039.1	PAIRED
ERR1473040	brain	https://sra-downloadb.be-md.ncbi.nlm.nih.gov/sos2/sra-pub-run-9/ERR1473040/ERR1473040.3	PAIRED
ERR1473041	brain	https://sra-downloadb.be-md.ncbi.nlm.nih.gov/sos2/sra-pub-run-9/ERR1473041/ERR1473041.3	PAIRED
ERR1473042	brain	https://sra-downloadb.be-md.ncbi.nlm.nih.gov/sos2/sra-pub-run-9/ERR1473042/ERR1473042.1	PAIRED
ERR1473043	brain	https://sra-downloadb.be-md.ncbi.nlm.nih.gov/sos2/sra-pub-run-9/ERR1473043/ERR1473043.1	PAIRED
ERR1473044	brain	https://sra-downloadb.be-md.ncbi.nlm.nih.gov/sos2/sra-pub-run-9/ERR1473044/ERR1473044.3	PAIRED
ERR1473045	brain	https://sra-downloadb.be-md.ncbi.nlm.nih.gov/sos2/sra-pub-run-9/ERR1473045/ERR1473045.3	PAIRED
ERR1473046	brain	https://sra-downloadb.be-md.ncbi.nlm.nih.gov/sos2/sra-pub-run-9/ERR1473046/ERR1473046.1	PAIRED
ERR1473048	brain	https://sra-downloadb.be-md.ncbi.nlm.nih.gov/sos2/sra-pub-run-9/ERR1473048/ERR1473048.1	PAIRED
ERR1473050	brain	https://sra-downloadb.be-md.ncbi.nlm.nih.gov/sos2/sra-pub-run-9/ERR1473050/ERR1473050.1	PAIRED
ERR1473051	brain	https://sra-downloadb.be-md.ncbi.nlm.nih.gov/sos2/sra-pub-run-9/ERR1473051/ERR1473051.1	PAIRED
ERR1473052	brain	https://sra-downloadb.be-md.ncbi.nlm.nih.gov/sos2/sra-pub-run-9/ERR1473052/ERR1473052.3	PAIRED
ERR1473053	brain	https://sra-downloadb.be-md.ncbi.nlm.nih.gov/sos2/sra-pub-run-9/ERR1473053/ERR1473053.1	PAIRED
ERR1473054	brain	https://sra-downloadb.be-md.ncbi.nlm.nih.gov/sos2/sra-pub-run-9/ERR1473054/ERR1473054.3	PAIRED
ERR1473056	brain	https://sra-downloadb.be-md.ncbi.nlm.nih.gov/sos2/sra-pub-run-9/ERR1473056/ERR1473056.3	PAIRED
ERR1473057	brain	https://sra-downloadb.be-md.ncbi.nlm.nih.gov/sos2/sra-pub-run-9/ERR1473057/ERR1473057.1	PAIRED
ERR1473058	brain	https://sra-downloadb.be-md.ncbi.nlm.nih.gov/sos2/sra-pub-run-9/ERR1473058/ERR1473058.3	PAIRED
ERR1473059	brain	https://sra-downloadb.be-md.ncbi.nlm.nih.gov/sos2/sra-pub-run-9/ERR1473059/ERR1473059.3	PAIRED
ERR1473061	brain	https://sra-downloadb.be-md.ncbi.nlm.nih.gov/sos2/sra-pub-run-9/ERR1473061/ERR1473061.1	PAIRED
ERR1473062	brain	https://sra-downloadb.be-md.ncbi.nlm.nih.gov/sos2/sra-pub-run-9/ERR1473062/ERR1473062.1	PAIRED
ERR1473065	brain	https://sra-downloadb.be-md.ncbi.nlm.nih.gov/sos2/sra-pub-run-9/ERR1473065/ERR1473065.1	PAIRED
ERR1473066	brain	https://sra-downloadb.be-md.ncbi.nlm.nih.gov/sos2/sra-pub-run-9/ERR1473066/ERR1473066.3	PAIRED
ERR1473067	brain	https://sra-downloadb.be-md.ncbi.nlm.nih.gov/sos2/sra-pub-run-9/ERR1473067/ERR1473067.1	PAIRED
ERR1473068	brain	https://sra-downloadb.be-md.ncbi.nlm.nih.gov/sos2/sra-pub-run-9/ERR1473068/ERR1473068.1	PAIRED
ERR1473069	brain	https://sra-downloadb.be-md.ncbi.nlm.nih.gov/sos2/sra-pub-run-9/ERR1473069/ERR1473069.3	PAIRED
ERR1473070	brain	https://sra-downloadb.be-md.ncbi.nlm.nih.gov/sos2/sra-pub-run-9/ERR1473070/ERR1473070.3	PAIRED
ERR1473071	brain	https://sra-downloadb.be-md.ncbi.nlm.nih.gov/sos2/sra-pub-run-9/ERR1473071/ERR1473071.1	PAIRED
ERR1473072	brain	https://sra-downloadb.be-md.ncbi.nlm.nih.gov/sos2/sra-pub-run-9/ERR1473072/ERR1473072.1	PAIRED
ERR1473073	brain	https://sra-downloadb.be-md.ncbi.nlm.nih.gov/sos2/sra-pub-run-9/ERR1473073/ERR1473073.1	PAIRED
ERR1473074	brain	https://sra-downloadb.be-md.ncbi.nlm.nih.gov/sos2/sra-pub-run-9/ERR1473074/ERR1473074.1	PAIRED
ERR1473075	brain	https://sra-downloadb.be-md.ncbi.nlm.nih.gov/sos2/sra-pub-run-9/ERR1473075/ERR1473075.1	PAIRED
ERR1473076	brain	https://sra-downloadb.be-md.ncbi.nlm.nih.gov/sos2/sra-pub-run-9/ERR1473076/ERR1473076.3	PAIRED
ERR1473079	brain	https://sra-downloadb.be-md.ncbi.nlm.nih.gov/sos2/sra-pub-run-9/ERR1473079/ERR1473079.3	PAIRED
ERR1473080	brain	https://sra-downloadb.be-md.ncbi.nlm.nih.gov/sos2/sra-pub-run-9/ERR1473080/ERR1473080.3	PAIRED
ERR1473081	brain	https://sra-downloadb.be-md.ncbi.nlm.nih.gov/sos2/sra-pub-run-9/ERR1473081/ERR1473081.1	PAIRED
ERR1473082	brain	https://sra-downloadb.be-md.ncbi.nlm.nih.gov/sos2/sra-pub-run-9/ERR1473082/ERR1473082.1	PAIRED
ERR1473084	brain	https://sra-downloadb.be-md.ncbi.nlm.nih.gov/sos2/sra-pub-run-9/ERR1473084/ERR1473084.1	PAIRED
ERR1473085	brain	https://sra-downloadb.be-md.ncbi.nlm.nih.gov/sos2/sra-pub-run-9/ERR1473085/ERR1473085.2	PAIRED
ERR315432	brain	https://sra-downloadb.be-md.ncbi.nlm.nih.gov/sos1/sra-pub-run-5/ERR315432/ERR315432.1	PAIRED
ERR315455	brain	https://sra-downloadb.be-md.ncbi.nlm.nih.gov/sos1/sra-pub-run-5/ERR315455/ERR315455.1	PAIRED
ERR315477	brain	https://sra-downloadb.be-md.ncbi.nlm.nih.gov/sos1/sra-pub-run-5/ERR315477/ERR315477.1	PAIRED
SRR2040575	brain	https://sra-downloadb.be-md.ncbi.nlm.nih.gov/sos1/sra-pub-run-5/SRR2040575/SRR2040575.1	PAIRED
SRR2040576	brain	https://sra-downloadb.be-md.ncbi.nlm.nih.gov/sos1/sra-pub-run-5/SRR2040576/SRR2040576.1	PAIRED
SRR8866867	brain	https://sra-download.ncbi.nlm.nih.gov/traces/sra8/SRR/008659/SRR8866867	PAIRED
SRR8866870	brain	https://sra-download.ncbi.nlm.nih.gov/traces/sra0/SRR/008659/SRR8866870	PAIRED
SRR8866871	brain	https://sra-downloadb.be-md.ncbi.nlm.nih.gov/sos1/sra-pub-run-2/SRR8866871/SRR8866871.1	PAIRED
ERR2704712	heart	https://sra-download.ncbi.nlm.nih.gov/traces/era23/ERR/ERR2704/ERR2704712	PAIRED
ERR2704713	heart	https://sra-download.ncbi.nlm.nih.gov/traces/era23/ERR/ERR2704/ERR2704713	PAIRED
ERR2704714	heart	https://sra-download.ncbi.nlm.nih.gov/traces/era23/ERR/ERR2704/ERR2704714	PAIRED
ERR2704715	heart	https://sra-download.ncbi.nlm.nih.gov/traces/era23/ERR/ERR2704/ERR2704715	PAIRED
ERR2704716	heart	https://sra-download.ncbi.nlm.nih.gov/traces/era23/ERR/ERR2704/ERR2704716	PAIRED
ERR2704717	heart	https://sra-download.ncbi.nlm.nih.gov/traces/era23/ERR/ERR2704/ERR2704717	PAIRED
ERR2704718	heart	https://sra-download.ncbi.nlm.nih.gov/traces/era23/ERR/ERR2704/ERR2704718	PAIRED
ERR2704719	heart	https://sra-download.ncbi.nlm.nih.gov/traces/era23/ERR/ERR2704/ERR2704719	PAIRED
ERR315328	heart	https://sra-downloadb.be-md.ncbi.nlm.nih.gov/sos1/sra-pub-run-5/ERR315328/ERR315328.1	PAIRED
ERR315389	heart	https://sra-downloadb.be-md.ncbi.nlm.nih.gov/sos1/sra-pub-run-5/ERR315389/ERR315389.1	PAIRED
ERR315435	heart	https://sra-downloadb.be-md.ncbi.nlm.nih.gov/sos1/sra-pub-run-5/ERR315435/ERR315435.1	PAIRED
SRR4421689	heart	https://sra-downloadb.be-md.ncbi.nlm.nih.gov/sos2/sra-pub-run-9/SRR4421689/SRR4421689.1	PAIRED
SRR4421747	heart	https://sra-downloadb.be-md.ncbi.nlm.nih.gov/sos2/sra-pub-run-9/SRR4421747/SRR4421747.1	PAIRED
SRR4421789	heart	https://sra-downloadb.be-md.ncbi.nlm.nih.gov/sos1/sra-pub-run-2/SRR4421789/SRR4421789.1	PAIRED
SRR7963755	heart	https://sra-downloadb.be-md.ncbi.nlm.nih.gov/sos1/sra-pub-run-2/SRR7963755/SRR7963755.1	PAIRED
SRR7963756	heart	https://sra-downloadb.be-md.ncbi.nlm.nih.gov/sos1/sra-pub-run-2/SRR7963756/SRR7963756.1	PAIRED
SRR7963757	heart	https://sra-downloadb.be-md.ncbi.nlm.nih.gov/sos1/sra-pub-run-2/SRR7963757/SRR7963757.1	PAIRED
SRR7963758	heart	https://sra-downloadb.be-md.ncbi.nlm.nih.gov/sos1/sra-pub-run-2/SRR7963758/SRR7963758.1	PAIRED
SRR7963759	heart	https://sra-downloadb.be-md.ncbi.nlm.nih.gov/sos1/sra-pub-run-2/SRR7963759/SRR7963759.1	PAIRED
ERR1994736	kidney	https://sra-downloadb.be-md.ncbi.nlm.nih.gov/sos1/sra-pub-run-2/ERR1994736/ERR1994736.1	PAIRED
ERR1994739	kidney	https://sra-downloadb.be-md.ncbi.nlm.nih.gov/sos1/sra-pub-run-2/ERR1994739/ERR1994739.1	PAIRED
ERR2223563	kidney	https://sra-downloadb.be-md.ncbi.nlm.nih.gov/sos1/sra-pub-run-2/ERR2223563/ERR2223563.1	PAIRED
ERR2223564	kidney	https://sra-downloadb.be-md.ncbi.nlm.nih.gov/sos1/sra-pub-run-2/ERR2223564/ERR2223564.1	PAIRED
ERR2223567	kidney	https://sra-downloadb.be-md.ncbi.nlm.nih.gov/sos1/sra-pub-run-2/ERR2223567/ERR2223567.1	PAIRED
ERR315383	kidney	https://sra-downloadb.be-md.ncbi.nlm.nih.gov/sos1/sra-pub-run-5/ERR315383/ERR315383.1	PAIRED
ERR315443	kidney	https://sra-downloadb.be-md.ncbi.nlm.nih.gov/sos1/sra-pub-run-5/ERR315443/ERR315443.1	PAIRED
ERR315468	kidney	https://sra-downloadb.be-md.ncbi.nlm.nih.gov/sos1/sra-pub-run-5/ERR315468/ERR315468.1	PAIRED
ERR315494	kidney	https://sra-downloadb.be-md.ncbi.nlm.nih.gov/sos1/sra-pub-run-5/ERR315494/ERR315494.1	PAIRED
SRR2014239	kidney	https://sra-downloadb.be-md.ncbi.nlm.nih.gov/sos1/sra-pub-run-5/SRR2014239/SRR2014239.1	PAIRED
SRR2014240	kidney	https://sra-downloadb.be-md.ncbi.nlm.nih.gov/sos1/sra-pub-run-5/SRR2014240/SRR2014240.1	PAIRED
SRR5171070	kidney	https://sra-downloadb.be-md.ncbi.nlm.nih.gov/sos2/sra-pub-run-9/SRR5171070/SRR5171070.1	PAIRED
SRR5171071	kidney	https://sra-downloadb.be-md.ncbi.nlm.nih.gov/sos2/sra-pub-run-9/SRR5171071/SRR5171071.1	PAIRED
SRR7180204	kidney	https://sra-downloadb.be-md.ncbi.nlm.nih.gov/sos2/sra-pub-run-13/SRR7180204/SRR7180204.1	PAIRED
SRR7180208	kidney	https://sra-downloadb.be-md.ncbi.nlm.nih.gov/sos2/sra-pub-run-13/SRR7180208/SRR7180208.1	PAIRED
SRR7180212	kidney	https://sra-downloadb.be-md.ncbi.nlm.nih.gov/sos2/sra-pub-run-13/SRR7180212/SRR7180212.1	PAIRED
SRR8181090	kidney	https://sra-download.ncbi.nlm.nih.gov/traces/sra47/SRR/007989/SRR8181090	PAIRED
SRR8181091	kidney	https://sra-download.ncbi.nlm.nih.gov/traces/sra47/SRR/007989/SRR8181091	PAIRED
ERR315327	liver	https://sra-downloadb.be-md.ncbi.nlm.nih.gov/sos1/sra-pub-run-5/ERR315327/ERR315327.1	PAIRED
ERR315394	liver	https://sra-downloadb.be-md.ncbi.nlm.nih.gov/sos1/sra-pub-run-5/ERR315394/ERR315394.1	PAIRED
ERR315414	liver	https://sra-downloadb.be-md.ncbi.nlm.nih.gov/sos1/sra-pub-run-5/ERR315414/ERR315414.1	PAIRED
ERR315451	liver	https://sra-downloadb.be-md.ncbi.nlm.nih.gov/sos1/sra-pub-run-5/ERR315451/ERR315451.1	PAIRED
ERR315463	liver	https://sra-downloadb.be-md.ncbi.nlm.nih.gov/sos1/sra-pub-run-5/ERR315463/ERR315463.1	PAIRED
SRR2014237	liver	https://sra-downloadb.be-md.ncbi.nlm.nih.gov/sos1/sra-pub-run-5/SRR2014237/SRR2014237.1	PAIRED
SRR2014238	liver	https://sra-downloadb.be-md.ncbi.nlm.nih.gov/sos1/sra-pub-run-5/SRR2014238/SRR2014238.1	PAIRED
SRR2040579	liver	https://sra-downloadb.be-md.ncbi.nlm.nih.gov/sos1/sra-pub-run-5/SRR2040579/SRR2040579.1	PAIRED
SRR2040580	liver	https://sra-downloadb.be-md.ncbi.nlm.nih.gov/sos1/sra-pub-run-5/SRR2040580/SRR2040580.1	PAIRED
SRR3129837	liver	https://sra-downloadb.be-md.ncbi.nlm.nih.gov/sos2/sra-pub-run-7/SRR3129837/SRR3129837.1	PAIRED
SRR3129841	liver	https://sra-downloadb.be-md.ncbi.nlm.nih.gov/sos2/sra-pub-run-7/SRR3129841/SRR3129841.1	PAIRED
SRR3129846	liver	https://sra-downloadb.be-md.ncbi.nlm.nih.gov/sos2/sra-pub-run-7/SRR3129846/SRR3129846.1	PAIRED
SRR3129847	liver	https://sra-downloadb.be-md.ncbi.nlm.nih.gov/sos2/sra-pub-run-7/SRR3129847/SRR3129847.1	PAIRED
SRR3129848	liver	https://sra-downloadb.be-md.ncbi.nlm.nih.gov/sos2/sra-pub-run-7/SRR3129849/SRR3129849.1	PAIRED
SRR3129849	liver	https://sra-downloadb.be-md.ncbi.nlm.nih.gov/sos2/sra-pub-run-7/SRR3129848/SRR3129848.1	PAIRED
SRR3129850	liver	https://sra-downloadb.be-md.ncbi.nlm.nih.gov/sos2/sra-pub-run-7/SRR3129850/SRR3129850.1	PAIRED
SRR3129851	liver	https://sra-downloadb.be-md.ncbi.nlm.nih.gov/sos2/sra-pub-run-7/SRR3129851/SRR3129851.1	PAIRED
SRR3129858	liver	https://sra-downloadb.be-md.ncbi.nlm.nih.gov/sos2/sra-pub-run-7/SRR3129858/SRR3129858.1	PAIRED
SRR3129859	liver	https://sra-downloadb.be-md.ncbi.nlm.nih.gov/sos2/sra-pub-run-7/SRR3129859/SRR3129859.1	PAIRED
SRR3129860	liver	https://sra-downloadb.be-md.ncbi.nlm.nih.gov/sos2/sra-pub-run-7/SRR3129860/SRR3129860.1	PAIRED
SRR3129861	liver	https://sra-downloadb.be-md.ncbi.nlm.nih.gov/sos2/sra-pub-run-7/SRR3129861/SRR3129861.1	PAIRED
SRR3129863	liver	https://sra-downloadb.be-md.ncbi.nlm.nih.gov/sos2/sra-pub-run-7/SRR3129863/SRR3129863.1	PAIRED
SRR3129869	liver	https://sra-downloadb.be-md.ncbi.nlm.nih.gov/sos2/sra-pub-run-7/SRR3129869/SRR3129869.1	PAIRED
SRR3129870	liver	https://sra-downloadb.be-md.ncbi.nlm.nih.gov/sos2/sra-pub-run-7/SRR3129870/SRR3129870.1	PAIRED
SRR3129871	liver	https://sra-downloadb.be-md.ncbi.nlm.nih.gov/sos2/sra-pub-run-7/SRR3129871/SRR3129871.1	PAIRED
SRR3129873	liver	https://sra-downloadb.be-md.ncbi.nlm.nih.gov/sos2/sra-pub-run-7/SRR3129873/SRR3129873.1	PAIRED
SRR3129874	liver	https://sra-downloadb.be-md.ncbi.nlm.nih.gov/sos2/sra-pub-run-7/SRR3129874/SRR3129874.1	PAIRED
SRR3129875	liver	https://sra-downloadb.be-md.ncbi.nlm.nih.gov/sos2/sra-pub-run-7/SRR3129875/SRR3129875.1	PAIRED
SRR3129877	liver	https://sra-downloadb.be-md.ncbi.nlm.nih.gov/sos2/sra-pub-run-7/SRR3129877/SRR3129877.1	PAIRED
SRR3129881	liver	https://sra-downloadb.be-md.ncbi.nlm.nih.gov/sos2/sra-pub-run-7/SRR3129881/SRR3129881.1	PAIRED
SRR3129882	liver	https://sra-downloadb.be-md.ncbi.nlm.nih.gov/sos2/sra-pub-run-7/SRR3129882/SRR3129882.1	PAIRED
SRR3129885	liver	https://sra-downloadb.be-md.ncbi.nlm.nih.gov/sos2/sra-pub-run-7/SRR3129885/SRR3129885.1	PAIRED
SRR3405449	liver	https://sra-downloadb.be-md.ncbi.nlm.nih.gov/sos2/sra-pub-run-7/SRR3405449/SRR3405449.1	PAIRED
SRR3590579	liver	https://sra-downloadb.be-md.ncbi.nlm.nih.gov/sos2/sra-pub-run-7/SRR3590579/SRR3590579.1	PAIRED
SRR3590580	liver	https://sra-downloadb.be-md.ncbi.nlm.nih.gov/sos2/sra-pub-run-7/SRR3590580/SRR3590580.1	PAIRED
ERR315326	lung	https://sra-downloadb.be-md.ncbi.nlm.nih.gov/sos1/sra-pub-run-5/ERR315326/ERR315326.1	PAIRED
ERR315341	lung	https://sra-downloadb.be-md.ncbi.nlm.nih.gov/sos1/sra-pub-run-5/ERR315341/ERR315341.1	PAIRED
ERR315346	lung	https://sra-downloadb.be-md.ncbi.nlm.nih.gov/sos1/sra-pub-run-5/ERR315346/ERR315346.1	PAIRED
ERR315353	lung	https://sra-downloadb.be-md.ncbi.nlm.nih.gov/sos1/sra-pub-run-5/ERR315353/ERR315353.1	PAIRED
ERR315424	lung	https://sra-downloadb.be-md.ncbi.nlm.nih.gov/sos1/sra-pub-run-5/ERR315424/ERR315424.1	PAIRED
ERR315439	lung	https://sra-downloadb.be-md.ncbi.nlm.nih.gov/sos1/sra-pub-run-5/ERR315439/ERR315439.1	PAIRED
ERR315444	lung	https://sra-downloadb.be-md.ncbi.nlm.nih.gov/sos1/sra-pub-run-5/ERR315444/ERR315444.1	PAIRED
ERR315487	lung	https://sra-downloadb.be-md.ncbi.nlm.nih.gov/sos1/sra-pub-run-5/ERR315487/ERR315487.1	PAIRED
SRR2014234	lung	https://sra-downloadb.be-md.ncbi.nlm.nih.gov/sos1/sra-pub-run-5/SRR2014234/SRR2014234.1	PAIRED
SRR2014235	lung	https://sra-downloadb.be-md.ncbi.nlm.nih.gov/sos1/sra-pub-run-5/SRR2014235/SRR2014235.1	PAIRED
SRR3588666	lung	https://sra-downloadb.be-md.ncbi.nlm.nih.gov/sos2/sra-pub-run-7/SRR3588666/SRR3588666.1	PAIRED
SRR3588667	lung	https://sra-downloadb.be-md.ncbi.nlm.nih.gov/sos2/sra-pub-run-7/SRR3588667/SRR3588667.1	PAIRED
SRR3588668	lung	https://sra-downloadb.be-md.ncbi.nlm.nih.gov/sos2/sra-pub-run-7/SRR3588668/SRR3588668.1	PAIRED
SRR3588706	lung	https://sra-downloadb.be-md.ncbi.nlm.nih.gov/sos2/sra-pub-run-7/SRR3588706/SRR3588706.1	PAIRED
SRR3588708	lung	https://sra-downloadb.be-md.ncbi.nlm.nih.gov/sos2/sra-pub-run-7/SRR3588708/SRR3588708.1	PAIRED
SRR3588709	lung	https://sra-downloadb.be-md.ncbi.nlm.nih.gov/sos2/sra-pub-run-7/SRR3588709/SRR3588709.1	PAIRED
SRR3588710	lung	https://sra-downloadb.be-md.ncbi.nlm.nih.gov/sos2/sra-pub-run-7/SRR3588710/SRR3588710.1	PAIRED
SRR5120922	lung	https://sra-downloadb.be-md.ncbi.nlm.nih.gov/sos2/sra-pub-run-9/SRR5120922/SRR5120922.1	PAIRED
SRR5120923	lung	https://sra-downloadb.be-md.ncbi.nlm.nih.gov/sos2/sra-pub-run-9/SRR5120923/SRR5120923.1	PAIRED
SRR5120924	lung	https://sra-downloadb.be-md.ncbi.nlm.nih.gov/sos2/sra-pub-run-9/SRR5120924/SRR5120924.1	PAIRED
SRR5120925	lung	https://sra-downloadb.be-md.ncbi.nlm.nih.gov/sos2/sra-pub-run-9/SRR5120925/SRR5120925.1	PAIRED
SRR5120926	lung	https://sra-downloadb.be-md.ncbi.nlm.nih.gov/sos2/sra-pub-run-9/SRR5120926/SRR5120926.1	PAIRED
SRR5120927	lung	https://sra-downloadb.be-md.ncbi.nlm.nih.gov/sos2/sra-pub-run-9/SRR5120927/SRR5120927.1	PAIRED
SRR5120928	lung	https://sra-downloadb.be-md.ncbi.nlm.nih.gov/sos2/sra-pub-run-9/SRR5120928/SRR5120928.1	PAIRED
SRR5120929	lung	https://sra-downloadb.be-md.ncbi.nlm.nih.gov/sos2/sra-pub-run-9/SRR5120929/SRR5120929.1	PAIRED
SRR5120930	lung	https://sra-downloadb.be-md.ncbi.nlm.nih.gov/sos2/sra-pub-run-9/SRR5120930/SRR5120930.1	PAIRED
SRR5120931	lung	https://sra-downloadb.be-md.ncbi.nlm.nih.gov/sos2/sra-pub-run-9/SRR5120931/SRR5120931.1	PAIRED
SRR5120932	lung	https://sra-downloadb.be-md.ncbi.nlm.nih.gov/sos2/sra-pub-run-9/SRR5120932/SRR5120932.1	PAIRED
SRR5120933	lung	https://sra-downloadb.be-md.ncbi.nlm.nih.gov/sos2/sra-pub-run-9/SRR5120933/SRR5120933.1	PAIRED
SRR5120934	lung	https://sra-downloadb.be-md.ncbi.nlm.nih.gov/sos2/sra-pub-run-9/SRR5120934/SRR5120934.1	PAIRED
SRR5120935	lung	https://sra-downloadb.be-md.ncbi.nlm.nih.gov/sos2/sra-pub-run-9/SRR5120935/SRR5120935.1	PAIRED
SRR5120936	lung	https://sra-downloadb.be-md.ncbi.nlm.nih.gov/sos2/sra-pub-run-9/SRR5120936/SRR5120936.1	PAIRED
SRR5120937	lung	https://sra-downloadb.be-md.ncbi.nlm.nih.gov/sos2/sra-pub-run-9/SRR5120937/SRR5120937.1	PAIRED
SRR5120938	lung	https://sra-downloadb.be-md.ncbi.nlm.nih.gov/sos2/sra-pub-run-9/SRR5120938/SRR5120938.1	PAIRED
SRR5120939	lung	https://sra-downloadb.be-md.ncbi.nlm.nih.gov/sos2/sra-pub-run-9/SRR5120939/SRR5120939.1	PAIRED
SRR5120940	lung	https://sra-downloadb.be-md.ncbi.nlm.nih.gov/sos2/sra-pub-run-9/SRR5120940/SRR5120940.1	PAIRED
SRR4240776	muscle	https://sra-downloadb.be-md.ncbi.nlm.nih.gov/sos2/sra-pub-run-9/SRR4240776/SRR4240776.1	PAIRED
SRR4240778	muscle	https://sra-downloadb.be-md.ncbi.nlm.nih.gov/sos2/sra-pub-run-9/SRR4240778/SRR4240778.1	PAIRED
SRR4240779	muscle	https://sra-downloadb.be-md.ncbi.nlm.nih.gov/sos2/sra-pub-run-9/SRR4240779/SRR4240779.1	PAIRED
SRR4240780	muscle	https://sra-downloadb.be-md.ncbi.nlm.nih.gov/sos2/sra-pub-run-9/SRR4240780/SRR4240780.1	PAIRED
SRR4240781	muscle	https://sra-downloadb.be-md.ncbi.nlm.nih.gov/sos2/sra-pub-run-9/SRR4240781/SRR4240781.1	PAIRED
SRR4240782	muscle	https://sra-downloadb.be-md.ncbi.nlm.nih.gov/sos2/sra-pub-run-9/SRR4240782/SRR4240782.1	PAIRED
SRR4240783	muscle	https://sra-downloadb.be-md.ncbi.nlm.nih.gov/sos1/sra-pub-run-2/SRR4240783/SRR4240783.1	PAIRED
SRR4240784	muscle	https://sra-downloadb.be-md.ncbi.nlm.nih.gov/sos2/sra-pub-run-9/SRR4240784/SRR4240784.1	PAIRED
SRR4240786	muscle	https://sra-downloadb.be-md.ncbi.nlm.nih.gov/sos2/sra-pub-run-9/SRR4240786/SRR4240786.1	PAIRED
SRR4240787	muscle	https://sra-downloadb.be-md.ncbi.nlm.nih.gov/sos2/sra-pub-run-9/SRR4240787/SRR4240787.1	PAIRED
SRR4240813	muscle	https://sra-downloadb.be-md.ncbi.nlm.nih.gov/sos2/sra-pub-run-9/SRR4240813/SRR4240813.1	PAIRED
SRR4240814	muscle	https://sra-downloadb.be-md.ncbi.nlm.nih.gov/sos2/sra-pub-run-9/SRR4240814/SRR4240814.1	PAIRED
SRR4240817	muscle	https://sra-downloadb.be-md.ncbi.nlm.nih.gov/sos2/sra-pub-run-9/SRR4240817/SRR4240817.1	PAIRED
SRR4240820	muscle	https://sra-downloadb.be-md.ncbi.nlm.nih.gov/sos2/sra-pub-run-9/SRR4240820/SRR4240820.1	PAIRED
SRR4240870	muscle	https://sra-downloadb.be-md.ncbi.nlm.nih.gov/sos2/sra-pub-run-9/SRR4240870/SRR4240870.1	PAIRED
ERR315380	ovary	https://sra-downloadb.be-md.ncbi.nlm.nih.gov/sos1/sra-pub-run-5/ERR315380/ERR315380.1	PAIRED
ERR315402	ovary	https://sra-downloadb.be-md.ncbi.nlm.nih.gov/sos1/sra-pub-run-5/ERR315402/ERR315402.1	PAIRED
ERR315458	ovary	https://sra-downloadb.be-md.ncbi.nlm.nih.gov/sos1/sra-pub-run-5/ERR315458/ERR315458.1	PAIRED
ERR315482	ovary	https://sra-downloadb.be-md.ncbi.nlm.nih.gov/sos1/sra-pub-run-5/ERR315482/ERR315482.1	PAIRED
SRR6350520	ovary	https://sra-downloadb.be-md.ncbi.nlm.nih.gov/sos2/sra-pub-run-11/SRR6350520/SRR6350520.1	PAIRED
SRR6350543	ovary	https://sra-downloadb.be-md.ncbi.nlm.nih.gov/sos2/sra-pub-run-11/SRR6350543/SRR6350543.1	PAIRED
SRR6350563	ovary	https://sra-downloadb.be-md.ncbi.nlm.nih.gov/sos2/sra-pub-run-11/SRR6350563/SRR6350563.1	PAIRED
SRR6350564	ovary	https://sra-downloadb.be-md.ncbi.nlm.nih.gov/sos2/sra-pub-run-11/SRR6350564/SRR6350564.1	PAIRED
SRR6350565	ovary	https://sra-downloadb.be-md.ncbi.nlm.nih.gov/sos2/sra-pub-run-11/SRR6350565/SRR6350565.1	PAIRED
SRR6350571	ovary	https://sra-downloadb.be-md.ncbi.nlm.nih.gov/sos2/sra-pub-run-11/SRR6350571/SRR6350571.1	PAIRED
SRR6350572	ovary	https://sra-downloadb.be-md.ncbi.nlm.nih.gov/sos2/sra-pub-run-11/SRR6350572/SRR6350572.1	PAIRED
SRR6350573	ovary	https://sra-downloadb.be-md.ncbi.nlm.nih.gov/sos2/sra-pub-run-11/SRR6350573/SRR6350573.1	PAIRED
SRR6350574	ovary	https://sra-downloadb.be-md.ncbi.nlm.nih.gov/sos2/sra-pub-run-11/SRR6350574/SRR6350574.1	PAIRED
SRR6350575	ovary	https://sra-downloadb.be-md.ncbi.nlm.nih.gov/sos2/sra-pub-run-11/SRR6350575/SRR6350575.1	PAIRED
SRR6350576	ovary	https://sra-downloadb.be-md.ncbi.nlm.nih.gov/sos2/sra-pub-run-11/SRR6350576/SRR6350576.1	PAIRED
SRR6350577	ovary	https://sra-downloadb.be-md.ncbi.nlm.nih.gov/sos2/sra-pub-run-11/SRR6350577/SRR6350577.1	PAIRED
SRR6350578	ovary	https://sra-downloadb.be-md.ncbi.nlm.nih.gov/sos2/sra-pub-run-11/SRR6350578/SRR6350578.1	PAIRED
SRR6350579	ovary	https://sra-downloadb.be-md.ncbi.nlm.nih.gov/sos2/sra-pub-run-11/SRR6350579/SRR6350579.1	PAIRED
SRR6350580	ovary	https://sra-downloadb.be-md.ncbi.nlm.nih.gov/sos2/sra-pub-run-11/SRR6350580/SRR6350580.1	PAIRED
SRR6350581	ovary	https://sra-downloadb.be-md.ncbi.nlm.nih.gov/sos2/sra-pub-run-11/SRR6350581/SRR6350581.1	PAIRED
ERR315338	spleen	https://sra-downloadb.be-md.ncbi.nlm.nih.gov/sos1/sra-pub-run-5/ERR315338/ERR315338.1	PAIRED
ERR315405	spleen	https://sra-downloadb.be-md.ncbi.nlm.nih.gov/sos1/sra-pub-run-5/ERR315405/ERR315405.1	PAIRED
ERR315416	spleen	https://sra-downloadb.be-md.ncbi.nlm.nih.gov/sos1/sra-pub-run-5/ERR315416/ERR315416.1	PAIRED
ERR315448	spleen	https://sra-downloadb.be-md.ncbi.nlm.nih.gov/sos1/sra-pub-run-5/ERR315448/ERR315448.1	PAIRED
ERR315473	spleen	https://sra-downloadb.be-md.ncbi.nlm.nih.gov/sos1/sra-pub-run-5/ERR315473/ERR315473.1	PAIRED
SRR1186056	spleen	https://sra-downloadb.be-md.ncbi.nlm.nih.gov/sos1/sra-pub-run-5/SRR1186056/SRR1186056.1	PAIRED
SRR1957203	spleen	https://sra-downloadb.be-md.ncbi.nlm.nih.gov/sos1/sra-pub-run-5/SRR1957203/SRR1957203.1	PAIRED
SRR4421468	spleen	https://sra-downloadb.be-md.ncbi.nlm.nih.gov/sos2/sra-pub-run-9/SRR4421468/SRR4421468.1	PAIRED
SRR5171096	spleen	https://sra-downloadb.be-md.ncbi.nlm.nih.gov/sos2/sra-pub-run-9/SRR5171096/SRR5171096.1	PAIRED
SRR5576275	spleen	https://sra-downloadb.be-md.ncbi.nlm.nih.gov/sos2/sra-pub-run-7/SRR5576275/SRR5576275.1	PAIRED
ERR315350	testis	https://sra-downloadb.be-md.ncbi.nlm.nih.gov/sos1/sra-pub-run-5/ERR315350/ERR315350.1	PAIRED
ERR315351	testis	https://sra-downloadb.be-md.ncbi.nlm.nih.gov/sos1/sra-pub-run-5/ERR315351/ERR315351.1	PAIRED
ERR315352	testis	https://sra-downloadb.be-md.ncbi.nlm.nih.gov/sos1/sra-pub-run-5/ERR315352/ERR315352.1	PAIRED
ERR315391	testis	https://sra-downloadb.be-md.ncbi.nlm.nih.gov/sos1/sra-pub-run-5/ERR315391/ERR315391.1	PAIRED
ERR315415	testis	https://sra-downloadb.be-md.ncbi.nlm.nih.gov/sos1/sra-pub-run-5/ERR315415/ERR315415.1	PAIRED
ERR315446	testis	https://sra-downloadb.be-md.ncbi.nlm.nih.gov/sos1/sra-pub-run-5/ERR315446/ERR315446.1	PAIRED
ERR315456	testis	https://sra-downloadb.be-md.ncbi.nlm.nih.gov/sos1/sra-pub-run-5/ERR315456/ERR315456.1	PAIRED
ERR315492	testis	https://sra-downloadb.be-md.ncbi.nlm.nih.gov/sos1/sra-pub-run-5/ERR315492/ERR315492.1	PAIRED
SRR2040581	testis	https://sra-downloadb.be-md.ncbi.nlm.nih.gov/sos1/sra-pub-run-5/SRR2040581/SRR2040581.1	PAIRED
SRR2040582	testis	https://sra-downloadb.be-md.ncbi.nlm.nih.gov/sos1/sra-pub-run-5/SRR2040582/SRR2040582.1	PAIRED
SRR2040583	testis	https://sra-downloadb.be-md.ncbi.nlm.nih.gov/sos1/sra-pub-run-5/SRR2040583/SRR2040583.1	PAIRED
SRR2051398	testis	https://sra-downloadb.be-md.ncbi.nlm.nih.gov/sos1/sra-pub-run-5/SRR2051398/SRR2051398.1	PAIRED
SRR2051399	testis	https://sra-downloadb.be-md.ncbi.nlm.nih.gov/sos1/sra-pub-run-5/SRR2051399/SRR2051399.1	PAIRED
SRR2051418	testis	https://sra-downloadb.be-md.ncbi.nlm.nih.gov/sos1/sra-pub-run-5/SRR2051418/SRR2051418.1	PAIRED
SRR5171109	testis	https://sra-downloadb.be-md.ncbi.nlm.nih.gov/sos2/sra-pub-run-9/SRR5171109/SRR5171109.1	PAIRED
SRR5171110	testis	https://sra-downloadb.be-md.ncbi.nlm.nih.gov/sos2/sra-pub-run-9/SRR5171110/SRR5171110.1	PAIRED
SRR5643181	testis	https://sra-downloadb.be-md.ncbi.nlm.nih.gov/sos2/sra-pub-run-11/SRR5643181/SRR5643181.1	PAIRED
SRR5643182	testis	https://sra-downloadb.be-md.ncbi.nlm.nih.gov/sos2/sra-pub-run-11/SRR5643182/SRR5643182.1	PAIRED
SRR5643183	testis	https://sra-downloadb.be-md.ncbi.nlm.nih.gov/sos2/sra-pub-run-11/SRR5643183/SRR5643183.1	PAIRED
SRR6015233	testis	https://sra-downloadb.be-md.ncbi.nlm.nih.gov/sos2/sra-pub-run-11/SRR6015233/SRR6015233.1	PAIRED
SRR6015234	testis	https://sra-downloadb.be-md.ncbi.nlm.nih.gov/sos2/sra-pub-run-11/SRR6015234/SRR6015234.1	PAIRED
SRR6015235	testis	https://sra-downloadb.be-md.ncbi.nlm.nih.gov/sos2/sra-pub-run-11/SRR6015235/SRR6015235.1	PAIRED
SRR6015236	testis	https://sra-downloadb.be-md.ncbi.nlm.nih.gov/sos2/sra-pub-run-11/SRR6015236/SRR6015236.1	PAIRED
SRR6015237	testis	https://sra-downloadb.be-md.ncbi.nlm.nih.gov/sos2/sra-pub-run-11/SRR6015237/SRR6015237.1	PAIRED
SRR6040987	testis	https://sra-downloadb.be-md.ncbi.nlm.nih.gov/sos2/sra-pub-run-11/SRR6040987/SRR6040987.1	PAIRED
SRR6040988	testis	https://sra-downloadb.be-md.ncbi.nlm.nih.gov/sos2/sra-pub-run-11/SRR6040988/SRR6040988.1	PAIRED
SRR6040989	testis	https://sra-downloadb.be-md.ncbi.nlm.nih.gov/sos2/sra-pub-run-11/SRR6040989/SRR6040989.1	PAIRED
SRR6040990	testis	https://sra-downloadb.be-md.ncbi.nlm.nih.gov/sos2/sra-pub-run-11/SRR6040990/SRR6040990.1	PAIRED
SRR6040995	testis	https://sra-downloadb.be-md.ncbi.nlm.nih.gov/sos2/sra-pub-run-11/SRR6040995/SRR6040995.1	PAIRED
SRR6040996	testis	https://sra-downloadb.be-md.ncbi.nlm.nih.gov/sos2/sra-pub-run-11/SRR6040996/SRR6040996.1	PAIRED
SRR6040997	testis	https://sra-downloadb.be-md.ncbi.nlm.nih.gov/sos2/sra-pub-run-11/SRR6040997/SRR6040997.1	PAIRED
SRR6040998	testis	https://sra-downloadb.be-md.ncbi.nlm.nih.gov/sos2/sra-pub-run-11/SRR6040998/SRR6040998.1	PAIRED
SRR6253512	testis	https://sra-downloadb.be-md.ncbi.nlm.nih.gov/sos2/sra-pub-run-11/SRR6253512/SRR6253512.1	PAIRED
SRR6253513	testis	https://sra-downloadb.be-md.ncbi.nlm.nih.gov/sos2/sra-pub-run-11/SRR6253513/SRR6253513.1	PAIRED
SRR6253514	testis	https://sra-downloadb.be-md.ncbi.nlm.nih.gov/sos2/sra-pub-run-11/SRR6253514/SRR6253514.1	PAIRED
SRR6253515	testis	https://sra-downloadb.be-md.ncbi.nlm.nih.gov/sos2/sra-pub-run-11/SRR6253515/SRR6253515.1	PAIRED
SRR6253516	testis	https://sra-downloadb.be-md.ncbi.nlm.nih.gov/sos2/sra-pub-run-11/SRR6253516/SRR6253516.1	PAIRED
SRR6253517	testis	https://sra-downloadb.be-md.ncbi.nlm.nih.gov/sos2/sra-pub-run-11/SRR6253517/SRR6253517.1	PAIRED
SRR6253518	testis	https://sra-downloadb.be-md.ncbi.nlm.nih.gov/sos2/sra-pub-run-11/SRR6253518/SRR6253518.1	PAIRED
SRR6253519	testis	https://sra-downloadb.be-md.ncbi.nlm.nih.gov/sos2/sra-pub-run-11/SRR6253519/SRR6253519.1	PAIRED
SRR6253520	testis	https://sra-downloadb.be-md.ncbi.nlm.nih.gov/sos2/sra-pub-run-11/SRR6253520/SRR6253520.1	PAIRED
SRR6253521	testis	https://sra-downloadb.be-md.ncbi.nlm.nih.gov/sos2/sra-pub-run-11/SRR6253521/SRR6253521.1	PAIRED
SRR6253522	testis	https://sra-downloadb.be-md.ncbi.nlm.nih.gov/sos2/sra-pub-run-11/SRR6253522/SRR6253522.1	PAIRED
SRR6253523	testis	https://sra-downloadb.be-md.ncbi.nlm.nih.gov/sos2/sra-pub-run-11/SRR6253523/SRR6253523.1	PAIRED
SRR6253524	testis	https://sra-downloadb.be-md.ncbi.nlm.nih.gov/sos2/sra-pub-run-11/SRR6253524/SRR6253524.1	PAIRED
SRR6253525	testis	https://sra-downloadb.be-md.ncbi.nlm.nih.gov/sos2/sra-pub-run-11/SRR6253525/SRR6253525.1	PAIRED
SRR6253527	testis	https://sra-downloadb.be-md.ncbi.nlm.nih.gov/sos2/sra-pub-run-11/SRR6253527/SRR6253527.1	PAIRED
SRR6253528	testis	https://sra-downloadb.be-md.ncbi.nlm.nih.gov/sos2/sra-pub-run-11/SRR6253528/SRR6253528.1	PAIRED

## Sheet: ST2
Supplementary Table 2. Nonsynonymous and potential methylation loci with allele or genotype frequency of 1-5% in two populations
Gene	Chr	Pos	SNP	Ref	Alt	Freq	Population
ABI3BP	3	100566500	rs116508263	C	T	CT 0.0104	1000 Genome
ABITRAM	9	111696795	rs76817627	C	T	T 0.0116	1000 Genome
ACOXL	2	111562875	rs77331476	C	T	T 0.0108	1000 Genome
ADAMTS13	9	136291143	rs141932927	C	T	CT 0.0112	1000 Genome
ADAMTS17	15	100672282	rs61754841	C	T	CT 0.0144	1000 Genome
ADGRF1	6	46977783	rs45598235	C	T	T 0.0371	1000 Genome
ADM5	19	50193437	rs45613034	C	A	CA 0.0200	1000 Genome
ALDH4A1	1	19211987	rs113846237	C	T	T 0.0136	1000 Genome
ALPG	2	233274509	rs1048995	C	G	GG 0.0128	1000 Genome
ANKS1B	12	100169425	rs116525095	C	T	T 0.0110	1000 Genome
ANTXRL	10	47700976	rs73292942	C	T	T 0.0104	1000 Genome
AOC2	17	40997065	rs35833794	C	T	CT 0.0124	1000 Genome
AOPEP	9	97563076	rs34557833	C	T	CT 0.0120	1000 Genome
AP1G2	14	24029037	rs74849041	C	T	T 0.0112	1000 Genome
ARHGAP40	20	37272380	rs61737953	C	T	T 0.0136	1000 Genome
ARHGAP8;PRR5-ARHGAP8	22	45255628	rs9626585	C	T	T 0.0196	1000 Genome
ARMC5	16	31470194	rs28451331	C	G	G 0.0172	1000 Genome
ARSD	X	2825596	rs2229557	C	T	T 0.0111	1000 Genome
ATP6V1FNB	7	128506470	rs113752302	C	T	T 0.0156	1000 Genome
AXDND1	1	179460806	rs17369441	C	T	T 0.0216	1000 Genome
B4GALNT3	12	670520	rs149363012	C	T	CT 0.0100	1000 Genome
BEST2	19	12868839	rs149797899	C	G	CG 0.0100	1000 Genome
BLNK	10	97987265	rs144903484	C	T	CT 0.0160	1000 Genome
BTNL2	6	32363888	rs41441651	C	T	T 0.0491	1000 Genome
BTNL2	6	32370879	rs28362681	C	T	TT 0.0204	1000 Genome
BTNL2	6	32372962	rs41457146	C	T	CT 0.0104	1000 Genome
BUB1B	15	40457337	rs56079734	C	T	T 0.0232	1000 Genome
BZW1	2	201677156	rs576206260	C	T	CT 0.0108	1000 Genome
C12orf71	12	27234924	rs61741740	C	T	CT 0.0152	1000 Genome
C14orf180	14	105055171	rs78070047	C	T	CT 0.0120	1000 Genome
C19orf48	19	51301687	rs7251816	C	T	T 0.0180	1000 Genome
C22orf23	22	38347490	rs114523199	C	A	CA 0.0100	1000 Genome
C5orf52	5	157102123	rs142164982	C	T	CT 0.0136	1000 Genome
C6	5	41160373	rs77363096	C	T	CT 0.0156	1000 Genome
C9orf135	9	72459437	rs55859531	C	T	T 0.0242	1000 Genome
CACTIN	19	3624140	rs117491710	C	T	CT 0.0116	1000 Genome
CAGE1	6	7374210	rs142828071	C	T	T 0.0120	1000 Genome
CASP6	4	110615839	rs5030674	C	T	CT 0.0104	1000 Genome
CCDC114	19	48821738	rs58966182	C	G	G 0.0108	1000 Genome
CCDC158	4	77305566	rs80162610	C	T	T 0.0184	1000 Genome
CCDC191	3	113775233	rs140813529	C	T	CT 0.0132	1000 Genome
CCDC88C	14	91739105	rs61745465	C	T	CT 0.0108	1000 Genome
CENPF	1	214818837	rs79313448	C	T	CT 0.0148	1000 Genome
CEP164	11	117279712	rs61995733	C	T	T 0.0290	1000 Genome
CEP170B	14	105349570	rs41304371	C	T	CT 0.0156	1000 Genome
CHAT	10	50824106	rs41306415	C	T	CT 0.0108	1000 Genome
COL11A2	6	33132693	rs1799912	C	T	CT 0.0100	1000 Genome
COL18A1	21	46875500	rs7277693	C	T	CT 0.0116	1000 Genome
CORIN	4	47625753	rs75141391	C	T	T 0.0116	1000 Genome
CRAMP1	16	1664843	rs189020189	C	T	T 0.0170	1000 Genome
CROCC	1	17265567	rs376064239	C	T	CT 0.0140	1000 Genome
CRYBG2	1	26670609	rs34370465	C	T	TT 0.0451	1000 Genome
CRYBG3	3	97594786	rs79581944	C	T	T 0.0260	1000 Genome
CRYGC	2	208994274	rs61751949	C	T	T 0.0122	1000 Genome
CTRL	16	67965099	rs140026167	C	T	CT 0.0168	1000 Genome
CTXN2	15	48493739	rs190880430	C	T	CT 0.0136	1000 Genome
CUTA	6	33384473	rs41267649	C	T	CT 0.0104	1000 Genome
CXXC4	4	105412536	rs552060137	C	G	G 0.0106	1000 Genome
DENND10	10	120863708	rs75277104	C	G	CG 0.0128	1000 Genome
DHX57	2	39095403	rs61757604	C	T	CT 0.0136	1000 Genome
DISP3	1	11561489	rs61736678	C	T	CT 0.0136	1000 Genome
DLEC1	3	38104256	rs74865139	C	T	CT 0.0112	1000 Genome
DNAAF1	16	84209609	rs34777958	C	T	CT 0.0160	1000 Genome
DNAH17	17	76571121	rs61744339	C	T	T 0.0140	1000 Genome
DOCK10	2	225811640	rs73993935	C	T	CT 0.0152	1000 Genome
DTL	1	212273603	rs61733816	C	T	CT 0.0132	1000 Genome
DYNC1LI1	3	32586521	rs138677120	C	T	CT 0.0192	1000 Genome
ELANE	19	856145	rs17216670	C	T	CT 0.0108	1000 Genome
ELOA2	18	44561385	rs61747013	C	G	G 0.0194	1000 Genome
EME2	16	1825890	rs114640322	C	T	CT 0.0120	1000 Genome
EML3	11	62370246	rs34709729	C	T	T 0.0306	1000 Genome
EPB41L4A	5	111540126	rs114541405	C	T	CT 0.0136	1000 Genome
EPCAM	2	47604176	rs74531854	C	T	T 0.0142	1000 Genome
ERAP2	5	96228072	rs75263594	C	T	T 0.0112	1000 Genome
ERP27	12	15073952	rs35042193	C	T	T 0.0138	1000 Genome
ESPL1	12	53680505	rs35874650	C	A	A 0.0397	1000 Genome
FAT1	4	187630905	rs75367100	C	T	T 0.0304	1000 Genome
FAT3	11	92577553	rs150453320	C	T	CT 0.0116	1000 Genome
FCRL4	1	157559068	rs80105432	C	T	CT 0.0184	1000 Genome
FGL1	8	17739639	rs78484373	C	A	CA 0.0407	1000 Genome
FHDC1	4	153896257	rs113529553	C	T	CT 0.0180	1000 Genome
FOLR3	11	71850130	rs61734430	C	T	T 0.0218	1000 Genome
FPR3	19	52327441	rs61736493	C	T	CT 0.0108	1000 Genome
GALNT14	2	31215798	rs142294042	C	T	CT 0.0160	1000 Genome
GCFC2	2	75929513	rs41286007	C	T	CT 0.0176	1000 Genome
GCK	7	44228522	rs116093166	C	T	CT 0.0168	1000 Genome
GNAT3	7	80108304	rs75075195	C	T	CT 0.0100	1000 Genome
GNE	9	36276951	rs73449614	C	T	CT 0.0172	1000 Genome
GOT1L1	8	37795185	rs112805396	C	T	CT 0.0148	1000 Genome
GPR146	7	1097933	rs61731818	C	T	CT 0.0100	1000 Genome
GPR153	1	6314748	rs61741782	C	T	T 0.0180	1000 Genome
GPR35	2	241569692	rs3749171	C	T	TT 0.0248	1000 Genome
GPR63	6	97247547	rs35358396	C	T	T 0.0146	1000 Genome
GRIN3B	19	1005427	rs78844421	C	T	T 0.0312	1000 Genome
GZF1	20	23350790	rs10485644	C	T	TT 0.0152	1000 Genome
H1FNT	12	48723324	rs2732441	C	G	GG 0.0487	1000 Genome
HGFAC	4	3446058	rs377317114	C	T	CT 0.0104	1000 Genome
HIPK4	19	40886742	rs56365273	C	T	T 0.0238	1000 Genome
HK3	5	176318430	rs61739890	C	T	CT 0.0196	1000 Genome
HLA-DMA	6	32917411	rs41555121	C	T	T 0.0214	1000 Genome
HLA-DOB	6	32784676	rs2071554	C	T	TT 0.0156	1000 Genome
HLA-DPA1	6	33037060	rs115722167	C	T	T 0.0240	1000 Genome
HLA-DQA2	6	32713044	rs79517313	C	T	T 0.0329	1000 Genome
HLA-DQB1	6	32629920	rs41544112	C	T	T 0.0365	1000 Genome
HLA-DQB1	6	32632790	rs41540813	C	A	CA 0.0160	1000 Genome
HMCN2	9	133231528	rs113605246	C	T	CT 0.0180	1000 Genome
IER3	6	30711805	rs3094124	C	G	C 0.0315	1000 Genome
IFNL2	19	39759335	rs554971	C	T	T 0.0264	1000 Genome
IQCD	12	113645509	rs57468632	C	T	CT 0.0100	1000 Genome
IRX4	5	1878499	rs570462700	C	A	CA 0.0112	1000 Genome
ITGAL	16	30492823	rs1064524	C	T	T 0.0120	1000 Genome
IYD	6	150716612	rs73617694	C	T	T 0.0150	1000 Genome
KIAA1210	X	118284520	rs142034189	C	A	A 0.0252	1000 Genome
KIR2DL4;LOC112268354	19	55325451	rs374021043	C	T	T 0.0110	1000 Genome
KLF6	10	3824016	rs61731927	C	T	T 0.0188	1000 Genome
KLHL6	3	183226025	rs114212192	C	T	CT 0.0152	1000 Genome
KPRP	1	152733395	rs75836464	C	T	CT 0.0156	1000 Genome
KRT14	17	39739524	rs59780231	C	T	T 0.0278	1000 Genome
KRT25	17	38907448	rs72821893	C	T	CT 0.0116	1000 Genome
KRT7	12	52636874	rs7963792	C	T	T 0.0112	1000 Genome
KRTAP10-12	21	46117285	rs201215667	C	T	T 0.0108	1000 Genome
KRTAP12-1	21	46101993	rs55881656	C	T	T 0.0427	1000 Genome
KRTAP1-5	17	39183037	rs148354281	C	T	CT 0.0132	1000 Genome
KRTAP4-1	17	39340694	rs112363564	C	T	CT 0.0100	1000 Genome
KRTAP4-11	17	39274491	rs113376601	C	T	TT 0.0200	1000 Genome
KRTAP4-6	17	39296715	rs73983173	C	G	CG 0.0100	1000 Genome
LCE3C	1	152573463	rs73019253	C	T	T 0.0138	1000 Genome
LILRA2	19	55087462	rs7249054	C	T	T 0.0186	1000 Genome
LIPE	19	42930652	rs3745238	C	T	T 0.0439	1000 Genome
LRG1	19	4540003	rs115514161	C	T	T 0.0114	1000 Genome
LRRC14B	5	191793	rs73730742	C	T	CT 0.0168	1000 Genome
MAEA	4	1303499	rs116098348	C	T	T 0.0146	1000 Genome
MAP7D1	1	36636835	rs2296266	C	T	T 0.0144	1000 Genome
MAPT	17	44060775	rs63750417	C	T	TT 0.0160	1000 Genome
MCAT	22	43539309	rs200527554	C	A	CA 0.0168	1000 Genome
MCCD1	6	31496949	rs78957773	C	T	T 0.0158	1000 Genome
MCF2L	13	113730426	rs116760356	C	G	CG 0.0164	1000 Genome
MEFV	16	3293896	rs79662406	C	T	CT 0.0120	1000 Genome
MEGF11	15	66220799	rs137866207	C	T	T 0.0162	1000 Genome
MGAM2	7	141871176	rs111852582	C	T	CT 0.0120	1000 Genome
MGRN1	16	4733253	rs61734739	C	T	CT 0.0120	1000 Genome
MICA	6	31382831	rs41546114	C	T	T 0.0136	1000 Genome
MIIP	1	12089946	rs117146839	C	G	G 0.0126	1000 Genome
MIP	12	56848079	rs74641138	C	T	T 0.0220	1000 Genome
MOK	14	102749824	rs34114580	C	T	CT 0.0112	1000 Genome
MROH7	1	55119654	rs12074499	C	T	T 0.0282	1000 Genome
MSH5	6	31725978	rs28399976	C	G	G 0.0148	1000 Genome
MTUS2	13	29599410	rs116224145	C	T	T 0.0313	1000 Genome
MUC1	1	155160941	rs11465205	C	T	CT 0.0108	1000 Genome
MUC5B	11	1253904	rs200222877	C	T	CT 0.0120	1000 Genome
MUC5B	11	1262189	rs12363494	C	T	CT 0.0120	1000 Genome
MUC5B	11	1270361	rs201532622	C	T	T 0.0144	1000 Genome
MUCL3	6	30920086	rs79792575	C	T	T 0.0485	1000 Genome
NAAA	4	76857302	rs73825584	C	T	T 0.0160	1000 Genome
NACA2	17	59668517	rs61748812	C	A	CA 0.0188	1000 Genome
NACAD	7	45125663	rs73692203	C	T	T 0.0116	1000 Genome
NEURL4	17	7221197	rs118077107	C	T	CT 0.0164	1000 Genome
NISCH	3	52522591	rs61736838	C	T	CT 0.0140	1000 Genome
NLRC3	16	3594316	rs74760019	C	T	CT 0.0196	1000 Genome
NLRP7	19	55449446	rs77072552	C	T	CT 0.0156	1000 Genome
NOM1	7	156755824	rs114948943	C	G	CG 0.0188	1000 Genome
NUDT8	11	67395634	rs35181012	C	T	T 0.0198	1000 Genome
OCSTAMP	20	45174465	rs117208520	C	T	T 0.0194	1000 Genome
ODF3L2	19	464080	rs76592524	C	T	T 0.0282	1000 Genome
OR10AD1	12	48596708	rs114759358	C	T	T 0.0212	1000 Genome
OR10H1	19	15918694	rs61746478	C	G	CG 0.0144	1000 Genome
OR1D5	17	2966828	rs531952330	C	T	T 0.0282	1000 Genome
OR1Q1	9	125377176	rs187659423	C	T	T 0.0126	1000 Genome
OR2AJ1	1	248097461	rs61750766	C	T	CT 0.0132	1000 Genome
OR2H1	6	29430334	rs140963208	C	T	CT 0.0160	1000 Genome
OR2W3	1	248059252	rs61750779	C	T	TT 0.0276	1000 Genome
OR4N4	15	22383188	rs475947	C	T	CT 0.0124	1000 Genome
OR51G1	11	4945199	rs34742470	C	T	T 0.0489	1000 Genome
OR51I2	11	5475082	rs10450603	C	T	TT 0.0124	1000 Genome
OR52D1	11	5510396	rs7935144	C	T	T 0.0156	1000 Genome
OR52L1	11	6007899	rs4501959	C	T	TT 0.0411	1000 Genome
OR6J1	14	23103355	rs3751484	C	T	TT 0.0423	1000 Genome
OSCP1	1	36887813	rs17442970	C	A	CA 0.0216	1000 Genome
OXNAD1	3	16327909	rs6777976	C	T	TT 0.0383	1000 Genome
P2RX7	12	121605354	rs16950860	C	T	CT 0.0160	1000 Genome
PALD1	10	72298745	rs117244352	C	T	CT 0.0132	1000 Genome
PARP15	3	122329499	rs143268642	C	A	CA 0.0192	1000 Genome
PBOV1	6	138539372	rs73774688	C	T	CT 0.0132	1000 Genome
PCDHA6	5	140209717	rs116757950	C	T	CT 0.0184	1000 Genome
PDLIM3	4	186435443	rs11944325	C	T	T 0.0286	1000 Genome
PEX2	8	77895682	rs112108739	C	T	T 0.0282	1000 Genome
PHF21B	22	45312455	rs114778719	C	T	T 0.0100	1000 Genome
PHLDA3	1	201437832	rs35383942	C	T	T 0.0182	1000 Genome
PIEZO1	16	88782417	rs58548913	C	T	CT 0.0100	1000 Genome
PLA2G2F	1	20474812	rs150487984	C	T	CT 0.0104	1000 Genome
PLCH1	3	155200562	rs74737650	C	T	T 0.0254	1000 Genome
PLEKHJ1	19	2230593	rs112397317	C	T	T 0.0144	1000 Genome
POLQ	3	121202345	rs3218637	C	T	T 0.0134	1000 Genome
POLRMT	19	621561	rs10421235	C	A	AA 0.0264	1000 Genome
PPFIBP2	11	7627239	rs76465494	C	T	T 0.0218	1000 Genome
PPP1R18	6	30653549	rs116704984	C	T	CT 0.0136	1000 Genome
PRAMEF2	1	12919079	rs9659529	C	G	GG 0.0200	1000 Genome
PRMT9	4	148559892	rs77293186	C	T	T 0.0172	1000 Genome
PRR14L	22	32109927	rs115688748	C	T	T 0.0138	1000 Genome
PRUNE2	9	79322710	rs11145016	C	T	T 0.0102	1000 Genome
PSAPL1	4	7436239	rs56402179	C	T	TT 0.0164	1000 Genome
PSD	10	104174738	rs150603372	C	T	T 0.0128	1000 Genome
PSMB8	6	32811752	rs114772012	C	T	T 0.0168	1000 Genome
PTPN14	1	214551360	rs76763910	C	T	CT 0.0136	1000 Genome
RAB25	1	156039960	rs115837676	C	T	CT 0.0116	1000 Genome
RAD9B	12	110950665	rs7969568	C	T	CT 0.0176	1000 Genome
RAET1E	6	150211071	rs61747261	C	T	T 0.0134	1000 Genome
RECQL4	8	145741413	rs144637135	C	T	CT 0.0108	1000 Genome
REEP4	8	21996546	rs117397164	C	T	T 0.0118	1000 Genome
REG1B	2	79313990	rs62640882	C	T	T 0.0114	1000 Genome
RESF1	12	32136918	rs16919127	C	A	AA 0.0100	1000 Genome
RGS3	9	116356389	rs57845277	C	T	T 0.0108	1000 Genome
RIMBP2	12	130935796	rs142989103	C	G	G 0.0166	1000 Genome
RPL3L	16	1997004	rs113956264	C	T	T 0.0212	1000 Genome
SAPCD1	6	31731881	rs6905572	C	T	TT 0.0228	1000 Genome
SCAF11	12	46320944	rs28930670	C	T	CT 0.0152	1000 Genome
SEMA4A	1	156146669	rs199933282	C	T	CT 0.0168	1000 Genome
SEMA4C	2	97527490	rs79331914	C	T	T 0.0256	1000 Genome
SETD1B	12	122255755	rs115711780	C	A	CA 0.0116	1000 Genome
SH3PXD2B	5	171766566	rs62621449	C	T	T 0.0128	1000 Genome
SIM2	21	38081480	rs116988298	C	T	T 0.0156	1000 Genome
SLC16A4	1	110921952	rs35157487	C	T	T 0.0180	1000 Genome
SLC26A1	4	983612	rs73219719	C	T	CT 0.0144	1000 Genome
SLC29A4	7	5338736	rs150889269	C	T	T 0.0112	1000 Genome
SLC30A5	5	68411954	rs142663787	C	T	CT 0.0128	1000 Genome
SLC5A2	16	31501642	rs61746400	C	T	CT 0.0168	1000 Genome
SNAPC2	19	7987428	rs116635738	C	T	T 0.0108	1000 Genome
SNX15	11	64807235	rs495820	C	T	TT 0.0375	1000 Genome
SORCS2	4	7666180	rs35935435	C	A	CA 0.0120	1000 Genome
SP140	2	231152633	rs11887179	C	T	T 0.0104	1000 Genome
SPG11	15	44864905	rs115970214	C	T	CT 0.0144	1000 Genome
SPRR2F	1	153085152	rs151137674	C	T	T 0.0152	1000 Genome
SREBF1	17	17722503	rs74520623	C	T	CT 0.0100	1000 Genome
SRP68	17	74036544	rs75353721	C	T	CT 0.0172	1000 Genome
SSC4D	7	76030355	rs77067369	C	T	T 0.0100	1000 Genome
STAT6	12	57499258	rs118014438	C	T	CT 0.0180	1000 Genome
STEAP3	2	120020901	rs141086904	C	T	T 0.0176	1000 Genome
SYNDIG1L	14	74876300	rs61738680	C	T	T 0.0100	1000 Genome
TACC2	10	123843946	rs60531929	C	T	T 0.0300	1000 Genome
TAP1	6	32814942	rs1057149	C	T	TT 0.0100	1000 Genome
TAP1	6	32821365	rs57640466	C	G	G 0.0142	1000 Genome
TAP2	6	32800412	rs1800454	C	T	TT 0.0228	1000 Genome
TAP2	6	32800427	rs111303994	C	T	T 0.0160	1000 Genome
TAP2	6	32802938	rs140654840	C	T	T 0.0108	1000 Genome
TAPBP	6	33281576	rs117394742	C	T	T 0.0106	1000 Genome
TBXT	6	166572045	rs3127328	C	T	TT 0.0280	1000 Genome
TDP1	14	90429760	rs35455108	C	T	T 0.0102	1000 Genome
TECPR2	14	102900956	rs118141823	C	T	T 0.0106	1000 Genome
TECPR2	14	102918789	rs75004775	C	A	CA 0.0104	1000 Genome
TEP1	14	20850434	rs2229100	C	T	T 0.0150	1000 Genome
TFRC	3	195791240	rs41295879	C	T	T 0.0108	1000 Genome
THBD	20	23030102	rs191884040	C	T	CT 0.0136	1000 Genome
THNSL2	2	88478458	rs34250376	C	T	T 0.0196	1000 Genome
TMEM240	1	1470807	rs146206869	C	T	T 0.0136	1000 Genome
TMEM82	1	16070763	rs61740772	C	T	CT 0.0140	1000 Genome
TNC	9	117848368	rs61729478	C	T	CT 0.0112	1000 Genome
TNFAIP2	14	103600056	rs2234146	C	T	CT 0.0160	1000 Genome
TNK2	3	195591056	rs13433937	C	T	T 0.0162	1000 Genome
TNXB	6	32064161	rs118086587	C	T	CT 0.0108	1000 Genome
TNXB	6	32065890	rs184878358	C	T	CT 0.0132	1000 Genome
TPSG1	16	1272275	rs143120059	C	T	T 0.0250	1000 Genome
TRIM26	6	30166475	rs142601029	C	T	T 0.0312	1000 Genome
TRIM31	6	30080405	rs143020056	C	T	T 0.0335	1000 Genome
TRMU	22	46746188	rs35338668	C	T	T 0.0146	1000 Genome
TRPM2	21	45820196	rs35288229	C	T	T 0.0130	1000 Genome
TSPAN8	12	71533592	rs76495455	C	T	T 0.0152	1000 Genome
TSR1	17	2233880	rs115624786	C	T	CT 0.0180	1000 Genome
TTC31	2	74718680	rs114933629	C	T	CT 0.0132	1000 Genome
TTLL10	1	1115461	rs116383664	C	T	T 0.0118	1000 Genome
TTN	2	179403750	rs4894028	C	T	TT 0.0128	1000 Genome
TTN	2	179536955	rs59887778	C	T	CT 0.0172	1000 Genome
TUBB1	20	57599303	rs35565630	C	T	T 0.0114	1000 Genome
TUBGCP2	10	135094925	rs11101677	C	T	CT 0.0160	1000 Genome
UCP3	11	73718063	rs8179180	C	T	T 0.0176	1000 Genome
UHRF1BP1	6	34826612	rs61732794	C	T	T 0.0146	1000 Genome
USP36	17	76798460	rs77261246	C	T	T 0.0158	1000 Genome
USP6	17	5042589	rs147204288	C	T	CT 0.0104	1000 Genome
VSIG4	X	65241977	rs146489734	C	A	CA 0.0228	1000 Genome
VWA7	6	31744391	rs114151296	C	T	CT 0.0104	1000 Genome
WDR54	2	74652086	rs150243972	C	T	CT 0.0148	1000 Genome
WDR87	19	38384689	rs116031239	C	T	CT 0.0164	1000 Genome
WFS1	4	6303534	rs71530907	C	T	T 0.0120	1000 Genome
XBP1	22	29196494	rs5762809	C	T	TT 0.0367	1000 Genome
ZDHHC11B	5	751299	rs112221486	C	T	T 0.0280	1000 Genome
ZFHX2	14	24002201	rs61744308	C	T	T 0.0280	1000 Genome
ZNF230	19	44514436	rs75657250	C	T	T 0.0124	1000 Genome
ZNF532	18	56586091	rs138581536	C	T	CT 0.0104	1000 Genome
ZNF600	19	53269486	rs143951651	C	T	CT 0.0156	1000 Genome
ZNF654	3	88188285	rs58079813	C	T	CT 0.0148	1000 Genome
ZNF747	16	30544067	rs115499189	C	T	T 0.0120	1000 Genome
ABHD16A	6	31661164	rs148687021	C	T	CT 0.0150	CONVERGE
ACR	22	51176734	rs79314756	C	T	T 0.0376	CONVERGE
ALPG	2	233274509	rs1048995	C	G	GG 0.0169	CONVERGE
BEAN1	16	66503684	rs184299677	C	T	CT 0.0155	CONVERGE
BPIFB6	20	31619500	rs17301126	C	T	T 0.0463	CONVERGE
BTNL2	6	32363888	rs117372232	C	T	TT 0.0119	CONVERGE
BTNL2	6	32370879	rs115515802	C	T	TT 0.0383	CONVERGE
CCDC114	19	48821738	rs58966182	C	G	G 0.0161	CONVERGE
CCL4	17	34431360	rs143966312	C	T	CT 0.0145	CONVERGE
CEP164	11	117279712	rs61995733	C	T	T 0.0180	CONVERGE
CFAP410	21	45750112	rs185842266	C	T	T 0.0100	CONVERGE
COL11A2	6	33132693	rs1799912	C	T	T 0.0111	CONVERGE
DUOX2	15	45398423	.	C	A	CA 0.0109	CONVERGE
FAT3	11	92577553	rs150453320	C	T	CT 0.0145	CONVERGE
FCRL4	1	157559068	rs80105432	C	T	CT 0.0189	CONVERGE
FGFR3	4	1806633	rs56240927	C	T	T 0.0182	CONVERGE
GRM6	5	178410090	rs79602188	C	T	CT 0.0146	CONVERGE
GSDME	7	24756951	rs12540919	C	T	TT 0.0269	CONVERGE
H1FNT	12	48723324	rs2732441	C	G	G 0.0105	CONVERGE
HLA-B	6	31324491	rs146571969	C	A	AA 0.0195	CONVERGE
HLA-DMA	6	32917411	rs41555121	C	T	T 0.0206	CONVERGE
HLA-DPA1	6	33037060	rs115722167	C	T	T 0.0148	CONVERGE
HLA-DQB1	6	32629920	rs41544112	C	T	T 0.0319	CONVERGE
HLA-DRB1	6	32552026	rs17886436	C	T	TT 0.0462	CONVERGE
HLA-DRB1	6	32552039	rs150747106	C	T	TT 0.0110	CONVERGE
HLA-E	6	30459317	rs148162840	C	A	CA 0.0148	CONVERGE
HLA-G	6	29797420	rs142664118	C	T	T 0.0175	CONVERGE
HNRNPF	10	43882723	rs146819332	C	T	T 0.0167	CONVERGE
HSPA1L	6	31779728	rs141059651	C	G	G 0.0108	CONVERGE
KIAA1210	X	118284520	rs142034189	C	A	CA 0.0273	CONVERGE
KRT14	17	39739524	rs59780231	C	T	T 0.0480	CONVERGE
KRTAP1-5	17	39183037	rs148354281	C	T	T 0.0174	CONVERGE
KRTAP4-11;KRTAP4-8	17	39274491	rs113376601	C	T	TT 0.0416	CONVERGE
LEFTY1	1	226076669	rs41310561	C	T	TT 0.0195	CONVERGE
LMO7	13	76430665	rs75375399	C	T	T 0.0104	CONVERGE
MAB21L4	2	241834907	rs4359646	C	T	TT 0.0198	CONVERGE
MAP7D1	1	36636835	rs2296266	C	T	CT 0.0195	CONVERGE
MEX3D	19	1556410	rs184017550	C	G	G 0.0225	CONVERGE
MICA	6	31380198	rs115720194	C	T	TT 0.0404	CONVERGE
MICA	6	31382831	rs116789740	C	T	T 0.0173	CONVERGE
MIIP	1	12089946	rs117146839	C	G	G 0.0385	CONVERGE
MIP	12	56848079	rs74641138	C	T	T 0.0120	CONVERGE
MRGPRX1	11	18956196	rs78179510	C	T	TT 0.0213	CONVERGE
MTUS2	13	29599410	rs116224145	C	T	T 0.0191	CONVERGE
NLRP7	19	55449446	rs77072552	C	T	CT 0.0167	CONVERGE
OR2H1	6	29430334	rs140963208	C	T	T 0.0151	CONVERGE
OR2M5	1	248308934	1:248308934	C	T	CT 0.0188	CONVERGE
OR2W3	1	248059252	rs61750779	C	T	TT 0.0147	CONVERGE
OR5M9	11	56230456	rs190978981	C	T	CT 0.0130	CONVERGE
OR6J1	14	23103355	rs3751484	C	T	TT 0.0318	CONVERGE
OXNAD1	3	16327909	rs6777976	C	T	TT 0.0285	CONVERGE
PASK	2	242077496	rs1470414	C	T	TT 0.0251	CONVERGE
PHF21B	22	45312455	rs114778719	C	T	CT 0.0155	CONVERGE
PIP5K1C	19	3637460	rs138081265	C	A	CA 0.0181	CONVERGE
PLCH1	3	155200562	rs74737650	C	T	TT 0.0113	CONVERGE
POLRMT	19	621561	rs10421235	C	A	CA 0.0430	CONVERGE
PRMT9	4	148559892	rs77293186	C	T	T 0.0367	CONVERGE
PRX	19	40902634	19:40902634	C	T	T 0.0137	CONVERGE
REEP4	8	21996546	rs117397164	C	T	T 0.0161	CONVERGE
RIMBP2	12	130935796	rs142989103	C	G	G 0.0432	CONVERGE
RPL3L	16	1997004	rs113956264	C	T	CT 0.0189	CONVERGE
SAPCD1	6	31731881	rs6905572	C	T	TT 0.0306	CONVERGE
SCGB1C1;SCGB1C2	11	193112	rs7951297	C	T	TT 0.0273	CONVERGE
SEMA4C	2	97527490	rs79331914	C	T	TT 0.0306	CONVERGE
SLC30A5	5	68411954	rs142663787	C	T	CT 0.0125	CONVERGE
SP140L	2	231248261	rs28497362	C	T	TT 0.0320	CONVERGE
SPATA46	1	162346511	1:162346511	C	T	CT 0.0103	CONVERGE
SPTB	14	65260321	rs3742602	C	T	T 0.0213	CONVERGE
SRBD1	2	45640374	rs3755073	C	A	AA 0.0285	CONVERGE
STAT6	12	57499258	rs118014438	C	T	T 0.0440	CONVERGE
TAP2	6	32800412	rs104893997	C	T	TT 0.0270	CONVERGE
TAPBP	6	33281576	rs117394742	C	T	T 0.0104	CONVERGE
TBC1D10B	16	30381303	rs12930787	C	G	CG 0.0105	CONVERGE
TECPR2	14	102918789	rs75004775	C	A	CA 0.0442	CONVERGE
TG	8	133984058	rs2076740	C	T	TT 0.0487	CONVERGE
THAP8	19	36530421	rs191321109	C	T	CT 0.0162	CONVERGE
THNSL2	2	88478458	rs34250376	C	T	T 0.0134	CONVERGE
TNXB	6	32064161	rs118086587	C	T	T 0.0115	CONVERGE
TNXB	6	32065023	rs41270461	C	T	T 0.0434	CONVERGE
TNXB	6	32065890	rs184878358	C	T	CT 0.0125	CONVERGE
TPSD1	16	1306346	rs3865205	C	T	TT 0.0290	CONVERGE
TRIM26	6	30166475	rs142601029	C	T	T 0.0144	CONVERGE
TRIM31	6	30080405	rs143020056	C	T	T 0.0152	CONVERGE
TTN	2	179403750	rs4894028	C	T	T 0.0152	CONVERGE
TTN	2	179439952	rs56071233	C	T	CT 0.0155	CONVERGE
WDR25	14	100847617	rs34331240	C	T	T 0.0142	CONVERGE
WNT10A	2	219754840	rs116998555	C	T	T 0.0133	CONVERGE
XBP1	22	29196494	rs5762809	C	T	TT 0.0352	CONVERGE
XKR7	20	30584710	rs61750849	C	T	CT 0.0128	CONVERGE
ZDHHC11B	5	751299	rs189213204	C	T	T 0.0403	CONVERGE
ZNF600	19	53269486	rs143951651	C	T	T 0.0153	CONVERGE
ZSCAN10	16	3142911	rs11644978	C	G	GG 0.0211	CONVERGE
Chromosome position is based on hg37 for population CONVERGE
Chromosome position is based on hg38 for population 1000 genome

## Sheet: ST3
Supplementary Table 3. Candidate proteins for COVID-19 inactivation or aging marker proteins in plasma
Protein	Description
A1CF	APOBEC1 complementation factor
A2M	alpha-2-macroglobulin
A4GALT	alpha 1,4-galactosyltransferase (P blood group)
AARS1	alanyl-tRNA synthetase 1
ABCC6	ATP binding cassette subfamily C member 6
ABHD12	abhydrolase domain containing 12, lysophospholipase
ABL2	ABL proto-oncogene 2, non-receptor tyrosine kinase
ACAP2	ArfGAP with coiled-coil, ankyrin repeat and PH domains 2
ACBD6	acyl-CoA binding domain containing 6
ACLY	ATP citrate lyase
ACP5	acid phosphatase 5, tartrate resistant
ACY1	aminoacylase 1
ADAM23	ADAM metallopeptidase domain 23
ADAMTS15	ADAM metallopeptidase with thrombospondin type 1 motif 15
ADAMTS4	ADAM metallopeptidase with thrombospondin type 1 motif 4
ADAMTS6	ADAM metallopeptidase with thrombospondin type 1 motif 6
ADGRF1	adhesion G protein-coupled receptor F1
ADGRG5	adhesion G protein-coupled receptor G5
ADH4	alcohol dehydrogenase 4 (class II), pi polypeptide
ADPGK	ADP dependent glucokinase
ADSL	adenylosuccinate lyase
AFP	alpha fetoprotein
AGT	angiotensinogen
AIFM1	apoptosis inducing factor mitochondria associated 1
AK1	adenylate kinase 1
ALCAM	activated leukocyte cell adhesion molecule
ALDH3B1	aldehyde dehydrogenase 3 family member B1
AMH	anti-Mullerian hormone
JAML	junction adhesion molecule like
ANAPC10	anaphase promoting complex subunit 10
ANGPT1	angiopoietin 1
ANGPTL1	angiopoietin like 1
ANGPTL4	angiopoietin like 4
ANGPTL7	angiopoietin like 7
ANK2	ankyrin 2
ANKRD27	ankyrin repeat domain 27
ANKRD46	ankyrin repeat domain 46
ANP32B	acidic nuclear phosphoprotein 32 family member B
AP4M1	adaptor related protein complex 4 subunit mu 1
APBB1	amyloid beta precursor protein binding family B member 1
APOA1	apolipoprotein A1
APP	amyloid beta precursor protein
APPL1	adaptor protein, phosphotyrosine interacting with PH domain and leucine zipper 1
ARF3	ADP ribosylation factor 3
ARFIP1	ADP ribosylation factor interacting protein 1
ARHGAP36	Rho GTPase activating protein 36
ARHGAP5	Rho GTPase activating protein 5
ARHGDIA	Rho GDP dissociation inhibitor alpha
ARHGEF1	Rho guanine nucleotide exchange factor 1
ARHGEF25	Rho guanine nucleotide exchange factor 25
ARL11	ADP ribosylation factor like GTPase 11
ARMC5	armadillo repeat containing 5
ARPC3	actin related protein 2/3 complex subunit 3
ARRDC3	arrestin domain containing 3
ARSK	arylsulfatase family member K
ASGR1	asialoglycoprotein receptor 1
ASMTL	acetylserotonin O-methyltransferase like
ASTL	astacin like metalloendopeptidase
ATP2A3	ATPase sarcoplasmic/endoplasmic reticulum Ca2+ transporting 3
AXIN2	axin 2
B3GALT6	beta-1,3-galactosyltransferase 6
B3GNT2	UDP-GlcNAc:betaGal beta-1,3-N-acetylglucosaminyltransferase 2
BARD1	BRCA1 associated RING domain 1
BCL2A1	BCL2 related protein A1
BCL2L2	BCL2 like 2
BECN1	beclin 1
BIN1	bridging integrator 1
BIRC5	baculoviral IAP repeat containing 5
BMP10	bone morphogenetic protein 10
BMP6	bone morphogenetic protein 6
BMP7	bone morphogenetic protein 7
BPGM	bisphosphoglycerate mutase
BRDT	bromodomain testis associated
BTC	betacellulin
BUB1	BUB1 mitotic checkpoint serine/threonine kinase
VSIR	V-set immunoregulatory receptor
C12orf49	chromosome 12 open reading frame 49
C18orf32	chromosome 18 open reading frame 32
ANGPTL8	angiopoietin like 8
C1orf185	chromosome 1 open reading frame 185
C1orf210	chromosome 1 open reading frame 210
C1QBP	complement C1q binding protein
C1R	complement C1r
C2	complement C2
C4A	complement C4A (Rodgers blood group)
C4B	complement C4B (Chido blood group)
None	None
C6orf226	chromosome 6 open reading frame 226
C7	complement C7
C8orf33	chromosome 8 open reading frame 33
CARD19	caspase recruitment domain family member 19
CA1	carbonic anhydrase 1
CA10	carbonic anhydrase 10
CADM1	cell adhesion molecule 1
CADM3	cell adhesion molecule 3
CALR	calreticulin
CALY	calcyon neuron specific vesicular protein
CAMK1D	calcium/calmodulin dependent protein kinase ID
GOLM2	golgi membrane protein 2
CASP10	caspase 10
CASP3	caspase 3
CASS4	Cas scaffold protein family member 4
CAT	catalase
CBR3	carbonyl reductase 3
CBX5	chromobox 5
CCDC167	coiled-coil domain containing 167
CCDC80	coiled-coil domain containing 80
CCL13	C-C motif chemokine ligand 13
CCL16	C-C motif chemokine ligand 16
CCL23	C-C motif chemokine ligand 23
CCL24	C-C motif chemokine ligand 24
CCL25	C-C motif chemokine ligand 25
CCL3	C-C motif chemokine ligand 3
CCNB1	cyclin B1
CCNC	cyclin C
CD109	CD109 molecule
CD207	CD207 molecule
CD226	CD226 molecule
CD27	CD27 molecule
CD274	CD274 molecule
CD300A	CD300a molecule
CD300C	CD300c molecule
CD300LB	CD300 molecule like family member b
CD33	CD33 molecule
CD38	CD38 molecule
CD3G	CD3g molecule
CD4	CD4 molecule
CD48	CD48 molecule
CD58	CD58 molecule
CD59	CD59 molecule (CD59 blood group)
CD63	CD63 molecule
CD70	CD70 molecule
CD79A	CD79a molecule
CD84	CD84 molecule
CDK1	cyclin dependent kinase 1
CDH15	cadherin 15
CDH2	cadherin 2
CDH6	cadherin 6
CDHR1	cadherin related family member 1
CDKN3	cyclin dependent kinase inhibitor 3
CDNF	cerebral dopamine neurotrophic factor
CDON	cell adhesion associated, oncogene regulated
CEACAM4	CEA cell adhesion molecule 4
CEBPB	CCAAT enhancer binding protein beta
CELF2	CUGBP Elav-like family member 2
CERS5	ceramide synthase 5
CFB	complement factor B
CFHR5	complement factor H related 5
CFL1	cofilin 1
CFP	complement factor properdin
CGA	glycoprotein hormones, alpha polypeptide
CHCHD2	coiled-coil-helix-coiled-coil-helix domain containing 2
CHI3L1	chitinase 3 like 1
CHI3L2	chitinase 3 like 2
CHIC2	cysteine rich hydrophobic domain 2
CHIT1	chitinase 1
CHKB	choline kinase beta
CHST11	carbohydrate sulfotransferase 11
CHST15	carbohydrate sulfotransferase 15
CHST3	carbohydrate sulfotransferase 3
CHST9	carbohydrate sulfotransferase 9
CISD1	CDGSH iron sulfur domain 1
CLC	Charcot-Leyden crystal galectin
CLEC14A	C-type lectin domain containing 14A
CLEC4E	C-type lectin domain family 4 member E
CLECL1	C-type lectin like 1
CLSTN3	calsyntenin 3
CLTC	clathrin heavy chain
CLU	clusterin
CNDP2	carnosine dipeptidase 2
CNEP1R1	CTD nuclear envelope phosphatase 1 regulatory subunit 1
CNOT1	CCR4-NOT transcription complex subunit 1
CNTNAP1	contactin associated protein 1
COG8	component of oligomeric golgi complex 8
COL6A5	collagen type VI alpha 5 chain
COLGALT1	collagen beta(1-O)galactosyltransferase 1
COLGALT2	collagen beta(1-O)galactosyltransferase 2
COMMD1	copper metabolism domain containing 1
COMMD7	COMM domain containing 7
COTL1	coactosin like F-actin binding protein 1
COX8A	cytochrome c oxidase subunit 8A
CRABP2	cellular retinoic acid binding protein 2
CREB3L1	cAMP responsive element binding protein 3 like 1
CREB3L4	cAMP responsive element binding protein 3 like 4
CRELD1	cysteine rich with EGF like domains 1
CRH	corticotropin releasing hormone
CRISP3	cysteine rich secretory protein 3
CRLF2	cytokine receptor like factor 2
CRTAM	cytotoxic and regulatory T cell molecule
CSF2	colony stimulating factor 2
CSF2RA	colony stimulating factor 2 receptor subunit alpha
CSF2RB	colony stimulating factor 2 receptor subunit beta
CSF3R	colony stimulating factor 3 receptor
CSH1	chorionic somatomammotropin hormone 1
CSH2	chorionic somatomammotropin hormone 2
CSNK1G2	casein kinase 1 gamma 2
CSNK2A2	casein kinase 2 alpha 2
CSNK2B	casein kinase 2 beta
CSRP2	cysteine and glycine rich protein 2
CST3	cystatin C
CST5	cystatin D
CST8	cystatin 8
CTRL	chymotrypsin like
CTSB	cathepsin B
CTSC	cathepsin C
CTSD	cathepsin D
CTSO	cathepsin O
CTSS	cathepsin S
CTSV	cathepsin V
CTSZ	cathepsin Z
CUBN	cubilin
CUL4B	cullin 4B
CUL9	cullin 9
CXCL13	C-X-C motif chemokine ligand 13
CXCL14	C-X-C motif chemokine ligand 14
CXCL16	C-X-C motif chemokine ligand 16
CXCL5	C-X-C motif chemokine ligand 5
CXCL8	C-X-C motif chemokine ligand 8
CXCL9	C-X-C motif chemokine ligand 9
CYCS	cytochrome c, somatic
CCN1	cellular communication network factor 1
CYTH2	cytohesin 2
DAG1	dystroglycan 1
DCP1A	decapping mRNA 1A
DCTN2	dynactin subunit 2
DDC	dopa decarboxylase
DDX25	DEAD-box helicase 25
DEFB105A	defensin beta 105A
DEFB106A	defensin beta 106A
DEFB110	defensin beta 110
DEFB115	defensin beta 115
DEFB135	defensin beta 135
DERL1	derlin 1
DHFR	dihydrofolate reductase
DKK3	dickkopf WNT signaling pathway inhibitor 3
DKKL1	dickkopf like acrosomal protein 1
DLL1	delta like canonical Notch ligand 1
DNAJB11	DnaJ heat shock protein family (Hsp40) member B11
DNAJB14	DnaJ heat shock protein family (Hsp40) member B14
DNAJB9	DnaJ heat shock protein family (Hsp40) member B9
DNAJC10	DnaJ heat shock protein family (Hsp40) member C10
DNAJC15	DnaJ heat shock protein family (Hsp40) member C15
DNAJC19	DnaJ heat shock protein family (Hsp40) member C19
DNAJC27	DnaJ heat shock protein family (Hsp40) member C27
DNASE2B	deoxyribonuclease 2 beta
DOCK9	dedicator of cytokinesis 9
DOK2	docking protein 2
DPP7	dipeptidyl peptidase 7
DPT	dermatopontin
DPYSL3	dihydropyrimidinase like 3
DPYSL5	dihydropyrimidinase like 5
DSC3	desmocollin 3
DUSP16	dual specificity phosphatase 16
DUSP6	dual specificity phosphatase 6
DYNLT3	dynein light chain Tctex-type 3
DYRK3	dual specificity tyrosine phosphorylation regulated kinase 3
EDA2R	ectodysplasin A2 receptor
EDAR	ectodysplasin A receptor
EDC4	enhancer of mRNA decapping 4
EFCAB14	EF-hand calcium binding domain 14
EFNA4	ephrin A4
EFNA5	ephrin A5
EFNB1	ephrin B1
EFNB2	ephrin B2
EFNB3	ephrin B3
EGFR	epidermal growth factor receptor
EHD4	EH domain containing 4
ELK1	ETS transcription factor ELK1
EMILIN3	elastin microfibril interfacer 3
ENPP7	ectonucleotide pyrophosphatase/phosphodiesterase 7
ENTPD1	ectonucleoside triphosphate diphosphohydrolase 1
EPHA1	EPH receptor A1
EPHA2	EPH receptor A2
EPHB4	EPH receptor B4
EPO	erythropoietin
EPS15L1	epidermal growth factor receptor pathway substrate 15 like 1
ERBB3	erb-b2 receptor tyrosine kinase 3
ERBB4	erb-b2 receptor tyrosine kinase 4
EREG	epiregulin
ERLEC1	endoplasmic reticulum lectin 1
ERO1A	endoplasmic reticulum oxidoreductase 1 alpha
ERP29	endoplasmic reticulum protein 29
ETHE1	ETHE1 persulfide dioxygenase
ETNK1	ethanolamine kinase 1
EVL	Enah/Vasp-like
EVPL	envoplakin
F3	coagulation factor III, tissue factor
FAAH2	fatty acid amide hydrolase 2
FABP1	fatty acid binding protein 1
FAF2	Fas associated factor family member 2
FAM107A	family with sequence similarity 107 member A
RETREG1	reticulophagy regulator 1
FAM163B	family with sequence similarity 163 member B
FAM171B	family with sequence similarity 171 member B
FAM174B	family with sequence similarity 174 member B
ABRAXAS2	abraxas 2, BRISC complex subunit
TAFA2	TAFA chemokine like family member 2
FAM3B	FAM3 metabolism regulating signaling molecule B
CIAO2A	cytosolic iron-sulfur assembly component 2A
FANCL	FA complementation group L
FARS2	phenylalanyl-tRNA synthetase 2, mitochondrial
FASLG	Fas ligand
FATE1	fetal and adult testis expressed 1
FBLN1	fibulin 1
FBXL4	F-box and leucine rich repeat protein 4
FCAR	Fc fragment of IgA receptor
FCGR1A	Fc fragment of IgG receptor Ia
FCGR2A	Fc fragment of IgG receptor IIa
FCGR2B	Fc fragment of IgG receptor IIb
FCN2	ficolin 2
FCN3	ficolin 3
FCRL6	Fc receptor like 6
FEN1	flap structure-specific endonuclease 1
FGA	fibrinogen alpha chain
FGB	fibrinogen beta chain
FGF1	fibroblast growth factor 1
FGF10	fibroblast growth factor 10
FGF17	fibroblast growth factor 17
FGF7	fibroblast growth factor 7
FGF9	fibroblast growth factor 9
FGFR3	fibroblast growth factor receptor 3
FGFR4	fibroblast growth factor receptor 4
FGG	fibrinogen gamma chain
VEGFD	vascular endothelial growth factor D
FKBP14	FKBP prolyl isomerase 14
FKBP7	FKBP prolyl isomerase 7
FLNA	filamin A
FLRT2	fibronectin leucine rich transmembrane protein 2
FLRT3	fibronectin leucine rich transmembrane protein 3
FN1	fibronectin 1
FNDC5	fibronectin type III domain containing 5
FOXC2	forkhead box C2
FOXJ2	forkhead box J2
FOXL2	forkhead box L2
FRZB	frizzled related protein
FURIN	furin, paired basic amino acid cleaving enzyme
FUT10	fucosyltransferase 10
GABBR2	gamma-aminobutyric acid type B receptor subunit 2
GADD45GIP1	GADD45G interacting protein 1
GAL	galanin and GMAP prepropeptide
GALNT10	polypeptide N-acetylgalactosaminyltransferase 10
GALNT16	polypeptide N-acetylgalactosaminyltransferase 16
GALNT3	polypeptide N-acetylgalactosaminyltransferase 3
GAN	gigaxonin
GAPDHS	glyceraldehyde-3-phosphate dehydrogenase, spermatogenic
GAS1	growth arrest specific 1
GCG	glucagon
GDF11	growth differentiation factor 11
GDF5	growth differentiation factor 5
GDNF	glial cell derived neurotrophic factor
GFRA2	GDNF family receptor alpha 2
GHDC	GH3 domain containing
GHR	growth hormone receptor
GJA1	gap junction protein alpha 1
GLIPR1	GLI pathogenesis related 1
GLT8D1	glycosyltransferase 8 domain containing 1
GNGT2	G protein subunit gamma transducin 2
GNPTG	N-acetylglucosamine-1-phosphate transferase subunit gamma
GNRH2	gonadotropin releasing hormone 2
GOLM1	golgi membrane protein 1
GPC3	glypican 3
GPC6	glypican 6
GPHA2	glycoprotein hormone subunit alpha 2
GPR107	G protein-coupled receptor 107
GPT	glutamic--pyruvic transaminase
GRAMD1C	GRAM domain containing 1C
GRAP	GRB2 related adaptor protein
GRN	granulin precursor
GRP	gastrin releasing peptide
GSTK1	glutathione S-transferase kappa 1
GSTT2B	glutathione S-transferase theta 2B (gene/pseudogene)
GUCA1A	guanylate cyclase activator 1A
GUCA2B	guanylate cyclase activator 2B
GYPA	glycophorin A (MNS blood group)
GZMA	granzyme A
GZMB	granzyme B
GZMH	granzyme H
H2AZ1	H2A.Z variant histone 1
HAMP	hepcidin antimicrobial peptide
HBEGF	heparin binding EGF like growth factor
HCK	HCK proto-oncogene, Src family tyrosine kinase
HDLBP	high density lipoprotein binding protein
HEPACAM2	HEPACAM family member 2
HJV	hemojuvelin BMP co-receptor
HGD	homogentisate 1,2-dioxygenase
HGF	hepatocyte growth factor
HGS	hepatocyte growth factor-regulated tyrosine kinase substrate
HHLA2	HERV-H LTR-associating 2
HIF1A	hypoxia inducible factor 1 subunit alpha
HINT2	histidine triad nucleotide binding protein 2
H2AW	H2A.W histone
HLA-DQA2	major histocompatibility complex, class II, DQ alpha 2
HMBS	hydroxymethylbilane synthase
HMGN1	high mobility group nucleosome binding domain 1
HNF4A	hepatocyte nuclear factor 4 alpha
HNRNPA2B1	heterogeneous nuclear ribonucleoprotein A2/B1
HNRNPC	heterogeneous nuclear ribonucleoprotein C
HPGD	15-hydroxyprostaglandin dehydrogenase
HPGDS	hematopoietic prostaglandin D synthase
HS3ST3B1	heparan sulfate-glucosamine 3-sulfotransferase 3B1
HS3ST4	heparan sulfate-glucosamine 3-sulfotransferase 4
HSD17B1	hydroxysteroid 17-beta dehydrogenase 1
HSD17B10	hydroxysteroid 17-beta dehydrogenase 10
HSD17B14	hydroxysteroid 17-beta dehydrogenase 14
HSP90AB1	heat shock protein 90 alpha family class B member 1
HSP90B1	heat shock protein 90 beta family member 1
HTATIP2	HIV-1 Tat interactive protein 2
HTN1	histatin 1
HTRA2	HtrA serine peptidase 2
IARS1	isoleucyl-tRNA synthetase 1
ICAM2	intercellular adhesion molecule 2
ICAM3	intercellular adhesion molecule 3
ICOS	inducible T cell costimulator
ICOSLG	inducible T cell costimulator ligand
IER3IP1	immediate early response 3 interacting protein 1
IFIT2	interferon induced protein with tetratricopeptide repeats 2
IFNA10	interferon alpha 10
IFNA14	interferon alpha 14
IFNGR1	interferon gamma receptor 1
IFNL2	interferon lambda 2
IGFBP6	insulin like growth factor binding protein 6
IGFBP7	insulin like growth factor binding protein 7
IGSF8	immunoglobulin superfamily member 8
IL10RA	interleukin 10 receptor subunit alpha
IL12A	interleukin 12A
IL12B	interleukin 12B
IL12RB2	interleukin 12 receptor subunit beta 2
IL13	interleukin 13
IL13RA1	interleukin 13 receptor subunit alpha 1
IL15RA	interleukin 15 receptor subunit alpha
IL16	interleukin 16
IL17A	interleukin 17A
IL17RC	interleukin 17 receptor C
IL1A	interleukin 1 alpha
IL1B	interleukin 1 beta
IL1R1	interleukin 1 receptor type 1
IL1R2	interleukin 1 receptor type 2
IL1RL1	interleukin 1 receptor like 1
IL22	interleukin 22
IL23A	interleukin 23 subunit alpha
IL27RA	interleukin 27 receptor subunit alpha
IL3	interleukin 3
IL37	interleukin 37
IL5	interleukin 5
IL7R	interleukin 7 receptor
IMPDH2	inosine monophosphate dehydrogenase 2
INHBA	inhibin subunit beta A
INHBB	inhibin subunit beta B
INSL5	insulin like 5
INSL6	insulin like 6
INSR	insulin receptor
IRF6	interferon regulatory factor 6
ISG15	ISG15 ubiquitin like modifier
ISM1	isthmin 1
ISOC1	isochorismatase domain containing 1
ITGA5	integrin subunit alpha 5
ITGAL	integrin subunit alpha L
ITM2B	integral membrane protein 2B
ITSN1	intersectin 1
JAKMIP3	Janus kinase and microtubule interacting protein 3
JAM2	junctional adhesion molecule 2
JPH1	junctophilin 1
KCNA10	potassium voltage-gated channel subfamily A member 10
KCNE2	potassium voltage-gated channel subfamily E regulatory subunit 2
KCNE5	potassium voltage-gated channel subfamily E regulatory subunit 5
KCNN1	potassium calcium-activated channel subfamily N member 1
KDR	kinase insert domain receptor
MINAR1	membrane integral NOTCH2 associated receptor 1
ELAPOR2	endosome-lysosome associated apoptosis and autophagy regulator family member 2
KIN	Kin17 DNA and RNA binding protein
KIR3DS1	killer cell immunoglobulin like receptor, three Ig domains and short cytoplasmic tail 1
KITLG	KIT ligand
KLK14	kallikrein related peptidase 14
KLK5	kallikrein related peptidase 5
KLRC3	killer cell lectin like receptor C3
KLRF1	killer cell lectin like receptor F1
KMT2C	lysine methyltransferase 2C
KPNA2	karyopherin subunit alpha 2
KRT17	keratin 17
KRT5	keratin 5
KRT7	keratin 7
KRTAP2-4	keratin associated protein 2-4
KYNU	kynureninase
LAIR1	leukocyte associated immunoglobulin like receptor 1
LAMC2	laminin subunit gamma 2
LAYN	layilin
LCN2	lipocalin 2
LCN8	lipocalin 8
LDLR	low density lipoprotein receptor
LDOC1	LDOC1 regulator of NFKB signaling
LGALS1	galectin 1
LGALS3	galectin 3
LGALS7	galectin 7
LGALS9	galectin 9
LGMN	legumain
LIF	LIF interleukin 6 family cytokine
LILRA5	leukocyte immunoglobulin like receptor A5
LILRA6	leukocyte immunoglobulin like receptor A6
LILRB4	leukocyte immunoglobulin like receptor B4
LIN7B	lin-7 homolog B, crumbs cell polarity complex component
LIPK	lipase family member K
LIPN	lipase family member N
LMAN2	lectin, mannose binding 2
LMCD1	LIM and cysteine rich domains 1
LMNB1	lamin B1
LMOD1	leiomodin 1
LPAL2	lipoprotein(a) like 2, pseudogene
LRIT2	leucine rich repeat, Ig-like and transmembrane domains 2
LRP1	LDL receptor related protein 1
LRP8	LDL receptor related protein 8
LRPPRC	leucine rich pentatricopeptide repeat containing
LRRC4C	leucine rich repeat containing 4C
LRRK2	leucine rich repeat kinase 2
LRTM1	leucine rich repeats and transmembrane domains 1
LTBR	lymphotoxin beta receptor
LY86	lymphocyte antigen 86
LYN	LYN proto-oncogene, Src family tyrosine kinase
LYPLAL1	lysophospholipase like 1
LYSMD3	LysM domain containing 3
MAN1A1	mannosidase alpha class 1A member 1
MANEA	mannosidase endo-alpha
MANSC4	MANSC domain containing 4
MAPKAPK2	MAPK activated protein kinase 2
MAPKAPK3	MAPK activated protein kinase 3
MB	myoglobin
MCEE	methylmalonyl-CoA epimerase
MCFD2	multiple coagulation factor deficiency 2, ER cargo receptor complex subunit
MED1	mediator complex subunit 1
MEPE	matrix extracellular phosphoglycoprotein
MFAP5	microfibril associated protein 5
MGA	MAX dimerization protein MGA
MGAT1	alpha-1,3-mannosyl-glycoprotein 2-beta-N-acetylglucosaminyltransferase
MGAT4C	MGAT4 family member C
MICA	MHC class I polypeptide-related sequence A
MICB	MHC class I polypeptide-related sequence B
MID2	midline 2
MIF	macrophage migration inhibitory factor
MILR1	mast cell immunoglobulin like receptor 1
MMEL1	membrane metalloendopeptidase like 1
MMGT1	membrane magnesium transporter 1
MMP10	matrix metallopeptidase 10
MMP12	matrix metallopeptidase 12
MMP16	matrix metallopeptidase 16
MMP17	matrix metallopeptidase 17
MMP3	matrix metallopeptidase 3
MMP7	matrix metallopeptidase 7
MMRN2	multimerin 2
MNX1	motor neuron and pancreas homeobox 1
MPDZ	multiple PDZ domain crumbs cell polarity complex component
MPP6	membrane palmitoylated protein 6
MPP7	membrane palmitoylated protein 7
MPZ	myelin protein zero
MRAP	melanocortin 2 receptor accessory protein
MRPL32	mitochondrial ribosomal protein L32
IRAG1	inositol 1,4,5-triphosphate receptor associated 1
MSR1	macrophage scavenger receptor 1
MST1R	macrophage stimulating 1 receptor
MSTN	myostatin
MTFR1	mitochondrial fission regulator 1
MTPAP	mitochondrial poly(A) polymerase
MYO6	myosin VI
MYOM2	myomesin 2
MZF1	myeloid zinc finger 1
N6AMT1	N-6 adenine-specific DNA methyltransferase 1
NAB2	NGFI-A binding protein 2
NAGK	N-acetylglucosamine kinase
NAP1L2	nucleosome assembly protein 1 like 2
NBL1	NBL1, DAN family BMP antagonist
NBR1	NBR1 autophagy cargo receptor
NCL	nucleolin
NCR2	natural cytotoxicity triggering receptor 2
NCR3	natural cytotoxicity triggering receptor 3
NEFH	neurofilament heavy
NELL1	neural EGFL like 1
NELL2	neural EGFL like 2
NEO1	neogenin 1
NET1	neuroepithelial cell transforming 1
NEURL4	neuralized E3 ubiquitin protein ligase 4
NGFR	nerve growth factor receptor
NGRN	neugrin, neurite outgrowth associated
NHEJ1	non-homologous end joining factor 1
NID1	nidogen 1
NLGN4X	neuroligin 4 X-linked
NMB	neuromedin B
NMT1	N-myristoyltransferase 1
NOG	noggin
NPC2	NPC intracellular cholesterol transporter 2
NPDC1	neural proliferation, differentiation and control 1
NPTX1	neuronal pentraxin 1
NQO1	NAD(P)H quinone dehydrogenase 1
NRCAM	neuronal cell adhesion molecule
NRG4	neuregulin 4
NRP1	neuropilin 1
NT5C	5', 3'-nucleotidase, cytosolic
NTF4	neurotrophin 4
NTN1	netrin 1
NTNG1	netrin G1
NTRK1	neurotrophic receptor tyrosine kinase 1
NTRK3	neurotrophic receptor tyrosine kinase 3
NUDC	nuclear distribution C, dynein complex regulator
NUDT16L1	nudix hydrolase 16 like 1
NXPH1	neurexophilin 1
OAF	out at first homolog
OAS1	2'-5'-oligoadenylate synthetase 1
OAZ1	ornithine decarboxylase antizyme 1
OCRL	OCRL inositol polyphosphate-5-phosphatase
OLFML3	olfactomedin like 3
OMD	osteomodulin
OPALIN	oligodendrocytic myelin paranodal and inner loop protein
OPCML	opioid binding protein/cell adhesion molecule like
OPHN1	oligophrenin 1
OSM	oncostatin M
OSTN	osteocrin
PAFAH1B2	platelet activating factor acetylhydrolase 1b catalytic subunit 2
PAM	peptidylglycine alpha-amidating monooxygenase
PAPOLG	poly(A) polymerase gamma
PAPPA2	pappalysin 2
PARP16	poly(ADP-ribose) polymerase family member 16
PATE1	prostate and testis expressed 1
PC	pyruvate carboxylase
PCBD2	pterin-4 alpha-carbinolamine dehydratase 2
PCDH10	protocadherin 10
PCDHA7	protocadherin alpha 7
PCDHAC2	protocadherin alpha subfamily C, 2
PCDHGC5	protocadherin gamma subfamily C, 5
PDCD1LG2	programmed cell death 1 ligand 2
PDE2A	phosphodiesterase 2A
PDE9A	phosphodiesterase 9A
PDGFRA	platelet derived growth factor receptor alpha
PDGFRL	platelet derived growth factor receptor like
PDILT	protein disulfide isomerase like, testis expressed
PEAR1	platelet endothelial aggregation receptor 1
PFDN5	prefoldin subunit 5
PGF	placental growth factor
PGLYRP1	peptidoglycan recognition protein 1
PGRMC1	progesterone receptor membrane component 1
PI3	peptidase inhibitor 3
PIANP	PILR alpha associated neural protein
PIAS4	protein inhibitor of activated STAT 4
PIGR	polymeric immunoglobulin receptor
PIK3CA	phosphatidylinositol-4,5-bisphosphate 3-kinase catalytic subunit alpha
PIK3R1	phosphoinositide-3-kinase regulatory subunit 1
PIM1	Pim-1 proto-oncogene, serine/threonine kinase
PLA2G2C	phospholipase A2 group IIC
PLAU	plasminogen activator, urokinase
PLAUR	plasminogen activator, urokinase receptor
PLBD1	phospholipase B domain containing 1
PLBD2	phospholipase B domain containing 2
PLCG1	phospholipase C gamma 1
PLD3	phospholipase D family member 3
PLG	plasminogen
None	None
PLOD3	procollagen-lysine,2-oxoglutarate 5-dioxygenase 3
PLXNA1	plexin A1
PMS2	PMS1 homolog 2, mismatch repair system component
PNKP	polynucleotide kinase 3'-phosphatase
POGLUT1	protein O-glucosyltransferase 1
POLI	DNA polymerase iota
POMGNT2	protein O-linked mannose N-acetylglucosaminyltransferase 2 (beta 1,4-)
POR	cytochrome p450 oxidoreductase
PPM1A	protein phosphatase, Mg2+/Mn2+ dependent 1A
PPP1R3B	protein phosphatase 1 regulatory subunit 3B
PPP3R1	protein phosphatase 3 regulatory subunit B, alpha
PRC1	protein regulator of cytokinesis 1
PRDX4	peroxiredoxin 4
PRIM1	DNA primase subunit 1
PRKAA2	protein kinase AMP-activated catalytic subunit alpha 2
PRKAB2	protein kinase AMP-activated non-catalytic subunit beta 2
PRKACA	protein kinase cAMP-activated catalytic subunit alpha
PRKAG1	protein kinase AMP-activated non-catalytic subunit gamma 1
PRKAR1B	protein kinase cAMP-dependent type I regulatory subunit beta
PRKCZ	protein kinase C zeta
PRKG1	protein kinase cGMP-dependent 1
PRLR	prolactin receptor
PRNP	prion protein
PROC	protein C, inactivator of coagulation factors Va and VIIIa
PROK1	prokineticin 1
PRPF6	pre-mRNA processing factor 6
PRRG1	proline rich and Gla domain 1
PRSS27	serine protease 27
PRTN3	proteinase 3
PSG9	pregnancy specific beta-1-glycoprotein 9
PSG4	pregnancy specific beta-1-glycoprotein 4
PSG6	pregnancy specific beta-1-glycoprotein 6
PSG8	pregnancy specific beta-1-glycoprotein 8
PSG9	pregnancy specific beta-1-glycoprotein 9
PSMA2	proteasome 20S subunit alpha 2
PSMA4	proteasome 20S subunit alpha 4
PSMD4	proteasome 26S subunit, non-ATPase 4
PSPN	persephin
PTEN	phosphatase and tensin homolog
PTH1R	parathyroid hormone 1 receptor
PTN	pleiotrophin
PTPN1	protein tyrosine phosphatase non-receptor type 1
PTPN4	protein tyrosine phosphatase non-receptor type 4
PTPRS	protein tyrosine phosphatase receptor type S
PTX3	pentraxin 3
PUF60	poly(U) binding splicing factor 60
PUS1	pseudouridine synthase 1
NECTIN4	nectin cell adhesion molecule 4
QPCT	glutaminyl-peptide cyclotransferase
QRFP	pyroglutamylated RFamide peptide
RAB14	RAB14, member RAS oncogene family
RAB22A	RAB22A, member RAS oncogene family
RAB26	RAB26, member RAS oncogene family
RAB27A	RAB27A, member RAS oncogene family
RAD1	RAD1 checkpoint DNA exonuclease
RAET1E	retinoic acid early transcript 1E
PLAAT4	phospholipase A and acyltransferase 4
RASA1	RAS p21 protein activator 1
RBBP6	RB binding protein 6, ubiquitin ligase
RBFOX2	RNA binding fox-1 homolog 2
RBL1	RB transcriptional corepressor like 1
RBM19	RNA binding motif protein 19
RBP4	retinol binding protein 4
RBP7	retinol binding protein 7
RCVRN	recoverin
RELB	RELB proto-oncogene, NF-kB subunit
RELL1	RELT like 1
REPIN1	replication initiator 1
RETN	resistin
RFFL	ring finger and FYVE like domain containing E3 ubiquitin protein ligase
RFNG	RFNG O-fucosylpeptide 3-beta-N-acetylglucosaminyltransferase
RFXAP	regulatory factor X associated protein
RGS18	regulator of G protein signaling 18
RIPPLY1	ripply transcriptional repressor 1
RNASE4	ribonuclease A family member 4
RND1	Rho family GTPase 1
RNF128	ring finger protein 128
RNF148	ring finger protein 148
RNF149	ring finger protein 149
RNF165	ring finger protein 165
RNF215	ring finger protein 215
ROBO1	roundabout guidance receptor 1
ROBO3	roundabout guidance receptor 3
RPN1	ribophorin I
CNOT9	CCR4-NOT transcription complex subunit 9
RSPO3	R-spondin 3
RTN4R	reticulon 4 receptor
S100A6	S100 calcium binding protein A6
SARS2	seryl-tRNA synthetase 2, mitochondrial
SCARF2	scavenger receptor class F member 2
SCGB1D2	secretoglobin family 1D member 2
SCIN	scinderin
SCMH1	Scm polycomb group protein homolog 1
SDF2L1	stromal cell derived factor 2 like 1
SEC22A	SEC22 homolog A, vesicle trafficking protein
SEC61B	SEC61 translocon subunit beta
SECTM1	secreted and transmembrane 1
SEMA3A	semaphorin 3A
SEMA3B	semaphorin 3B
SEMA5A	semaphorin 5A
SEMA7A	semaphorin 7A (John Milton Hagen blood group)
SEMG1	semenogelin 1
SERF1A	small EDRK-rich factor 1A
SERPINA4	serpin family A member 4
SERPINA7	serpin family A member 7
SERPIND1	serpin family D member 1
SERPINE1	serpin family E member 1
SERPINF1	serpin family F member 1
SFN	stratifin
SHC4	SHC adaptor protein 4
SHH	sonic hedgehog signaling molecule
SIGIRR	single Ig and TIR domain containing
SIGLEC1	sialic acid binding Ig like lectin 1
SIGLEC14	sialic acid binding Ig like lectin 14
SIRPB1	signal regulatory protein beta 1
SLAMF6	SLAM family member 6
SLITRK4	SLIT and NTRK like family member 4
SLURP1	secreted LY6/PLAUR domain containing 1
SMAP1	small ArfGAP 1
SMOC1	SPARC related modular calcium binding 1
SMPDL3A	sphingomyelin phosphodiesterase acid like 3A
SMYD2	SET and MYND domain containing 2
SNAP25	synaptosome associated protein 25
SNAPIN	SNAP associated protein
SNX4	sorting nexin 4
SNX7	sorting nexin 7
SOCS7	suppressor of cytokine signaling 7
SORBS3	sorbin and SH3 domain containing 3
SPAG11B	sperm associated antigen 11B
SPARCL1	SPARC like 1
SPATA9	spermatogenesis associated 9
SPINT2	serine peptidase inhibitor, Kunitz type 2
SPOCK1	SPARC (osteonectin), cwcv and kazal like domains proteoglycan 1
SPOCK2	SPARC (osteonectin), cwcv and kazal like domains proteoglycan 2
SPON1	spondin 1
SPP1	secreted phosphoprotein 1
SPTLC2	serine palmitoyltransferase long chain base subunit 2
SSMEM1	serine rich single-pass membrane protein 1
SSRP1	structure specific recognition protein 1
ST3GAL2	ST3 beta-galactoside alpha-2,3-sialyltransferase 2
ST6GAL1	ST6 beta-galactoside alpha-2,6-sialyltransferase 1
ST6GALNAC6	ST6 N-acetylgalactosaminide alpha-2,6-sialyltransferase 6
STAB1	stabilin 1
STAMBPL1	STAM binding protein like 1
STC2	stanniocalcin 2
STK17B	serine/threonine kinase 17b
STX2	syntaxin 2
SULT2A1	sulfotransferase family 2A member 1
SV2A	synaptic vesicle glycoprotein 2A
TACSTD2	tumor associated calcium signal transducer 2
TAPBP	TAP binding protein
TBX22	T-box transcription factor 22
TBX5	T-box transcription factor 5
TEAD4	TEA domain transcription factor 4
TENM4	teneurin transmembrane protein 4
TEX29	testis expressed 29
TFF1	trefoil factor 1
TFF2	trefoil factor 2
TG	thyroglobulin
TGFB1	transforming growth factor beta 1
TGFB3	transforming growth factor beta 3
THBS4	thrombospondin 4
TIMP4	TIMP metallopeptidase inhibitor 4
TJP1	tight junction protein 1
TLN2	talin 2
TLR2	toll like receptor 2
TMED2	transmembrane p24 trafficking protein 2
TMEM119	transmembrane protein 119
TMEM167A	transmembrane protein 167A
TMEM167B	transmembrane protein 167B
TMEM190	transmembrane protein 190
TMEM41B	transmembrane protein 41B
TMIE	transmembrane inner ear
TMUB2	transmembrane and ubiquitin like domain containing 2
TNF	tumor necrosis factor
TNFAIP3	TNF alpha induced protein 3
TNFRSF10D	TNF receptor superfamily member 10d
TNFRSF11B	TNF receptor superfamily member 11b
TNFRSF14	TNF receptor superfamily member 14
TNFRSF17	TNF receptor superfamily member 17
TNFRSF1A	TNF receptor superfamily member 1A
TNFRSF4	TNF receptor superfamily member 4
TNFRSF8	TNF receptor superfamily member 8
TNFSF13B	TNF superfamily member 13b
TNFSF8	TNF superfamily member 8
TNFSF9	TNF superfamily member 9
TNNI3	troponin I3, cardiac type
TNS2	tensin 2
TNS4	tensin 4
TOM1L1	target of myb1 like 1 membrane trafficking protein
TOR1AIP2	torsin 1A interacting protein 2
TP53	tumor protein p53
TP63	tumor protein p63
TPK1	thiamin pyrophosphokinase 1
TPSB2	tryptase beta 2 (gene/pseudogene)
TRAT1	T cell receptor associated transmembrane adaptor 1
TREML2	triggering receptor expressed on myeloid cells like 2
TSHB	thyroid stimulating hormone subunit beta
TTL	tubulin tyrosine ligase
TWSG1	twisted gastrulation BMP signaling modulator 1
TXN	thioredoxin
TYK2	tyrosine kinase 2
UBB	ubiquitin B
UBC	ubiquitin C
UBL4A	ubiquitin like 4A
UBTD2	ubiquitin domain containing 2
UCMA	upper zone of growth plate and cartilage matrix associated
UGP2	UDP-glucose pyrophosphorylase 2
UGT1A6	UDP glucuronosyltransferase family 1 member A6
ULBP2	UL16 binding protein 2
ULK3	unc-51 like kinase 3
UNC13A	unc-13 homolog A
UNC5D	unc-5 netrin receptor D
UPK3B	uroplakin 3B
USB1	U6 snRNA biogenesis phosphodiesterase 1
USP8	ubiquitin specific peptidase 8
None	None
VIT	vitrin
VPS29	VPS29 retromer complex component
VSIG1	V-set and immunoglobulin domain containing 1
VTI1A	vesicle transport through interaction with t-SNAREs 1A
VTI1B	vesicle transport through interaction with t-SNAREs 1B
VWC2L	von Willebrand factor C domain containing 2 like
WBP1L	WW domain binding protein 1 like
WDR1	WD repeat domain 1
WFDC10A	WAP four-disulfide core domain 10A
WFIKKN2	WAP, follistatin/kazal, immunoglobulin, kunitz and netrin domain containing 2
CCN6	cellular communication network factor 6
WNK3	WNK lysine deficient protein kinase 3
WSCD2	WSC domain containing 2
XG	Xg glycoprotein (Xg blood group)
XRCC1	X-ray repair cross complementing 1
XRCC4	X-ray repair cross complementing 4
YES1	YES proto-oncogene 1, Src family tyrosine kinase
YIPF6	Yip1 domain family member 6
YWHAB	tyrosine 3-monooxygenase/tryptophan 5-monooxygenase activation protein beta
YWHAE	tyrosine 3-monooxygenase/tryptophan 5-monooxygenase activation protein epsilon
YWHAG	tyrosine 3-monooxygenase/tryptophan 5-monooxygenase activation protein gamma
YWHAH	tyrosine 3-monooxygenase/tryptophan 5-monooxygenase activation protein eta
YWHAQ	tyrosine 3-monooxygenase/tryptophan 5-monooxygenase activation protein theta
YWHAZ	tyrosine 3-monooxygenase/tryptophan 5-monooxygenase activation protein zeta
ZDHHC14	zinc finger DHHC-type palmitoyltransferase 14
ZHX3	zinc fingers and homeoboxes 3
ZNF10	zinc finger protein 10
ZNF174	zinc finger protein 174
ZNF18	zinc finger protein 18
ZNF264	zinc finger protein 264
ZNF415	zinc finger protein 415
ZNF75D	zinc finger protein 75D
ZNF774	zinc finger protein 774
ZNF843	zinc finger protein 843
ZNRF3	zinc and ring finger 3
ZP4	zona pellucida glycoprotein 4

## Sheet: ST4
Supplementary Table 4. Candidate genes for COVID-19 infection, morbidity and clearance
Gene	Description
AAMP	angio associated migratory cell protein
ABCB1	ATP binding cassette subfamily B member 1
ACE	angiotensin I converting enzyme
ACE2	angiotensin I converting enzyme 2
ADA	adenosine deaminase
ADAL	adenosine deaminase like
ADGRE5	adhesion G protein-coupled receptor E5
ADORA1	adenosine A1 receptor
AGRP	agouti related neuropeptide
AGT	angiotensinogen
AGTR1	angiotensin II receptor type 1
AGTR2	angiotensin II receptor type 2
AMPD1	adenosine monophosphate deaminase 1
AMPD2	adenosine monophosphate deaminase 2
AMPD3	adenosine monophosphate deaminase 3
ANO1	anoctamin 1
ANPEP	alanyl aminopeptidase, membrane
ANXA13	annexin A13
APEH	acylaminoacyl-peptide hydrolase
ASIC1	acid sensing ion channel subunit 1
ASIC2	acid sensing ion channel subunit 2
ASIC3	acid sensing ion channel subunit 3
ASIC4	acid sensing ion channel subunit family member 4
ASIC5	acid sensing ion channel subunit family member 5
ASIP	agouti signaling protein
AVPR1B	arginine vasopressin receptor 1B
BDKRB2	bradykinin receptor B2
BEST1	bestrophin 1
BEST2	bestrophin 2
BEST3	bestrophin 3
BEST4	bestrophin 4
BSG	basigin (Ok blood group)
C4BPA	complement component 4 binding protein alpha
CAT	catalase
CD33	CD33 molecule
CD40	CD40 molecule
CD46	CD46 molecule
CD5	CD5 molecule
CD55	CD55 molecule (Cromer blood group)
CD59	CD59 molecule (CD59 blood group)
CD7	CD7 molecule
CDHR2	cadherin related family member 2
ADA2	adenosine deaminase 2
CFTR	CF transmembrane conductance regulator
CLCN3	chloride voltage-gated channel 3
CMA1	chymase 1
CR1	complement C3b/C4b receptor 1 (Knops blood group)
CSF2	colony stimulating factor 2
None	None
CXCL8	C-X-C motif chemokine ligand 8
DDX58	DExD/H-box helicase 58
DNAJC5	DnaJ heat shock protein family (Hsp40) member C5
DPP10	dipeptidyl peptidase like 10
DPP4	dipeptidyl peptidase 4
DPP6	dipeptidyl peptidase like 6
DPP8	dipeptidyl peptidase 8
DPP9	dipeptidyl peptidase 9
EIF2AK2	eukaryotic translation initiation factor 2 alpha kinase 2
ENPEP	glutamyl aminopeptidase
ERLIN1	ER lipid raft associated 1
ERLIN2	ER lipid raft associated 2
FAP	fibroblast activation protein alpha
FLOT1	flotillin 1
FLOT2	flotillin 2
FRK	fyn related Src family tyrosine kinase
GHRHR	growth hormone releasing hormone receptor
GHRL	ghrelin and obestatin prepropeptide
GHSR	growth hormone secretagogue receptor
GK	glycerol kinase
GPR31	G protein-coupled receptor 31
GRP	gastrin releasing peptide
GSTA3	glutathione S-transferase alpha 3
HOOK1	hook microtubule tethering protein 1
IFITM1	interferon induced transmembrane protein 1
IFITM2	interferon induced transmembrane protein 2
IFITM3	interferon induced transmembrane protein 3
IFNA1	interferon alpha 1
IFNA2	interferon alpha 2
IFNA8	interferon alpha 8
IFNAR1	interferon alpha and beta receptor subunit 1
IFNAR2	interferon alpha and beta receptor subunit 2
IFNB1	interferon beta 1
IFNE	interferon epsilon
IFNG	interferon gamma
IFNK	interferon kappa
IFNW1	interferon omega 1
IL10	interleukin 10
IL12A	interleukin 12A
IL12B	interleukin 12B
IL13	interleukin 13
IL19	interleukin 19
IL1A	interleukin 1 alpha
IL1R1	interleukin 1 receptor type 1
IL1RAP	interleukin 1 receptor accessory protein
IL2	interleukin 2
IL20	interleukin 20
IL23A	interleukin 23 subunit alpha
IL3	interleukin 3
IL33	interleukin 33
IL4	interleukin 4
IL5	interleukin 5
IL6	interleukin 6
IL7	interleukin 7
IL9	interleukin 9
IL9R	interleukin 9 receptor
IRAK4	interleukin 1 receptor associated kinase 4
IRF7	interferon regulatory factor 7
ISYNA1	inositol-3-phosphate synthase 1
ITGAX	integrin subunit alpha X
KCNJ1	potassium inwardly rectifying channel subfamily J member 1
KLRK1	killer cell lectin like receptor K1
LACTB2	lactamase beta 2
LEP	leptin
LY96	lymphocyte antigen 96
MAS1	MAS1 proto-oncogene, G protein-coupled receptor
MAVS	mitochondrial antiviral signaling protein
MC3R	melanocortin 3 receptor
MLN	motilin
MLNR	motilin receptor
MMP1	matrix metallopeptidase 1
MTUS1	microtubule associated scaffold protein 1
MX1	MX dynamin like GTPase 1
MX2	MX dynamin like GTPase 2
MYD88	MYD88 innate immune signal transduction adaptor
NEDD4	NEDD4 E3 ubiquitin protein ligase
NEDD4L	NEDD4 like E3 ubiquitin protein ligase
NLRP3	NLR family pyrin domain containing 3
NMB	neuromedin B
NMBR	neuromedin B receptor
NPHS2	NPHS2 stomatin family member, podocin
PHB	prohibitin
PHB2	prohibitin 2
PICK1	protein interacting with PRKCA 1
PIK3CB	phosphatidylinositol-4,5-bisphosphate 3-kinase catalytic subunit beta
PLAU	plasminogen activator, urokinase
PPM1A	protein phosphatase, Mg2+/Mn2+ dependent 1A
PREP	prolyl endopeptidase
PREPL	prolyl endopeptidase like
PRLHR	prolactin releasing hormone receptor
None	None
SCNN1A	sodium channel epithelial 1 subunit alpha
SCNN1B	sodium channel epithelial 1 subunit beta
SCNN1D	sodium channel epithelial 1 subunit delta
SCNN1G	sodium channel epithelial 1 subunit gamma
SIGIRR	single Ig and TIR domain containing
SLC10A2	solute carrier family 10 member 2
SLC12A6	solute carrier family 12 member 6
SLC6A3	solute carrier family 6 member 3
SLC9A1	solute carrier family 9 member A1
SLC9B1	solute carrier family 9 member B1
STOM	stomatin
STOML1	stomatin like 1
STOML2	stomatin like 2
STOML3	stomatin like 3
TICAM1	toll like receptor adaptor molecule 1
TICAM2	toll like receptor adaptor molecule 2
TIRAP	TIR domain containing adaptor protein
TLR1	toll like receptor 1
TLR10	toll like receptor 10
TLR2	toll like receptor 2
TLR3	toll like receptor 3
TLR4	toll like receptor 4
TLR5	toll like receptor 5
TLR6	toll like receptor 6
TLR7	toll like receptor 7
TLR8	toll like receptor 8
TLR9	toll like receptor 9
CLTRN	collectrin, amino acid transport regulator
TMPRSS2	transmembrane serine protease 2
TREH	trehalase
TXNRD1	thioredoxin reductase 1
VCAM1	vascular cell adhesion molecule 1
ZDHHC3	zinc finger DHHC-type palmitoyltransferase 3

## Sheet: ST5
Supplementary Table 5. GO functional enrichment analysis of candidate genes
Group	GOTerm	Count	Pvalue	Type	GeneRatio	BgRatio	P.adjust	GeneList
A	positive regulation of peptidyl-tyrosine phosphorylation	44	1.56774e-14	Biological Process	44/839	165/11512	5.40691e-11	AGT/ANGPT1/BMP6/CASS4/CD4/CSF2/CSH1/CSH2/EFNA5/EHD4/EPO/ERBB3/ERBB4/EREG/FCGR1A/FGF7/FGFR3/GHR/HBEGF/HGF/IL12A/IL12B/IL13/IL23A/IL3/IL5/ITGA5/KITLG/LIF/LILRA5/LRP8/LYN/MIF/NRP1/OSM/PRNP/PTPN1/TGFB1/THBS4/TNF/TNFRSF14/TNFRSF1A/TP53/YES1
A	peptidyl-tyrosine phosphorylation	64	2.29914e-14	Biological Process	64/839	314/11512	5.40691e-11	ABL2/AGT/ANGPT1/APP/BMP6/CASS4/CD300A/CD4/CSF2/CSH1/CSH2/DYRK3/EFNA5/EGFR/EHD4/EPHA1/EPHA2/EPHB4/EPO/ERBB3/ERBB4/EREG/FCGR1A/FGF7/FGFR3/FGFR4/GHR/HBEGF/HCK/HGF/IL12A/IL12B/IL12RB2/IL13/IL23A/IL3/IL5/INSR/ITGA5/KDR/KITLG/LIF/LILRA5/LRP8/LYN/MIF/MST1R/NRP1/NTRK1/NTRK3/OSM/PDGFRA/PRKCZ/PRLR/PRNP/PTPN1/TGFB1/THBS4/TNF/TNFRSF14/TNFRSF1A/TP53/TYK2/YES1
A	peptidyl-tyrosine modification	64	3.14477e-14	Biological Process	64/839	316/11512	5.40691e-11	ABL2/AGT/ANGPT1/APP/BMP6/CASS4/CD300A/CD4/CSF2/CSH1/CSH2/DYRK3/EFNA5/EGFR/EHD4/EPHA1/EPHA2/EPHB4/EPO/ERBB3/ERBB4/EREG/FCGR1A/FGF7/FGFR3/FGFR4/GHR/HBEGF/HCK/HGF/IL12A/IL12B/IL12RB2/IL13/IL23A/IL3/IL5/INSR/ITGA5/KDR/KITLG/LIF/LILRA5/LRP8/LYN/MIF/MST1R/NRP1/NTRK1/NTRK3/OSM/PDGFRA/PRKCZ/PRLR/PRNP/PTPN1/TGFB1/THBS4/TNF/TNFRSF14/TNFRSF1A/TP53/TYK2/YES1
A	regulation of peptidyl-tyrosine phosphorylation	48	2.02936e-12	Biological Process	48/839	217/11512	2.61686e-09	AGT/ANGPT1/APP/BMP6/CASS4/CD300A/CD4/CSF2/CSH1/CSH2/EFNA5/EGFR/EHD4/EPO/ERBB3/ERBB4/EREG/FCGR1A/FGF7/FGFR3/GHR/HBEGF/HGF/IL12A/IL12B/IL13/IL23A/IL3/IL5/ITGA5/KITLG/LIF/LILRA5/LRP8/LYN/MIF/NRP1/OSM/PRKCZ/PRNP/PTPN1/TGFB1/THBS4/TNF/TNFRSF14/TNFRSF1A/TP53/YES1
A	positive regulation of STAT cascade	24	8.73914e-10	Biological Process	24/839	79/11512	9.0153e-07	AGT/CD300A/CRLF2/CSF2/CSH1/CSH2/EPO/ERBB4/FGFR3/GHR/IL10RA/IL12A/IL12B/IL13/IL23A/IL3/IL5/IL7R/LIF/LYN/OSM/PRLR/TNF/TNFRSF1A
A	positive regulation of response to external stimulus	48	2.30079e-09	Biological Process	48/839	263/11512	1.97791e-06	AGT/APPL1/BMP6/C1QBP/CALR/CAMK1D/CCL24/CEBPB/CTSC/CXCL13/CXCL14/CXCL8/EGFR/F3/GRN/IL12A/IL12B/IL16/IL17A/IL17RC/IL1B/IL1RL1/IL23A/KDR/KLK5/LDLR/LGALS9/LGMN/LILRA5/LRP1/LY86/MIF/MSTN/NRP1/NTRK3/OSM/PDE2A/PGF/PLG/PTN/SEMA5A/SERPINE1/SNX4/TGFB1/THBS4/TLR2/TNF/TNFRSF1A
A	positive regulation of JAK-STAT cascade	22	1.19737e-08	Biological Process	22/839	76/11512	8.31508e-06	AGT/CD300A/CSF2/CSH1/CSH2/EPO/ERBB4/FGFR3/GHR/IL10RA/IL12A/IL12B/IL13/IL23A/IL3/IL5/LIF/LYN/OSM/PRLR/TNF/TNFRSF1A
A	positive regulation of protein kinase B signaling	32	1.28966e-08	Biological Process	32/839	146/11512	8.31508e-06	ANGPT1/BTC/C1QBP/CHI3L1/EGFR/ERBB3/ERBB4/EREG/F3/FGF1/FGF17/FGF7/FGF9/FGFR3/FGFR4/HBEGF/HGF/HSP90AB1/ICOS/INSR/ITSN1/KITLG/MST1R/OSM/PDGFRA/PIK3CA/PIK3R1/SEMA5A/TGFB1/TNF/TRAT1/TXN
A	salivary gland morphogenesis	14	1.46353e-08	Biological Process	14/839	32/11512	8.38764e-06	BMP7/DAG1/EDAR/EGFR/FGF7/HGF/NRP1/PLXNA1/SEMA3A/SHH/TGFB1/TGFB3/TNF/TWSG1
A	positive regulation of establishment of protein localization	60	2.10191e-08	Biological Process	60/839	390/11512	1.05324e-05	ANP32B/APBB1/BMP6/CADM1/CD33/CD38/CD58/CLEC4E/CRH/CRLF2/CRTAM/CSNK2A2/EGFR/FGA/FGB/FGG/FLNA/GCG/GJA1/GZMB/HIF1A/HTRA2/IFNGR1/IL13/IL17A/IL17RC/IL1A/IL1B/IL1RL1/IL5/LGALS9/LILRA5/LRP1/MIF/MMP12/NMT1/OAZ1/OSM/PIK3R1/PPM1A/PPP3R1/PRKACA/PRKCZ/PRNP/RBP4/SFN/SHH/TGFB1/TGFB3/TLR2/TNF/TNFRSF14/TNFRSF4/TP53/TP63/YWHAB/YWHAE/YWHAH/YWHAQ/YWHAZ
A	exocrine system development	16	2.24614e-08	Biological Process	16/839	43/11512	1.05324e-05	BMP7/DAG1/EDAR/EGFR/FGF7/HGF/INSR/NRP1/PLXNA1/RAB26/SEMA3A/SHH/TGFB1/TGFB3/TNF/TWSG1
A	positive regulation of defense response	62	2.58023e-08	Biological Process	62/839	411/11512	1.10907e-05	AGT/APPL1/C1QBP/CADM1/CCL24/CD226/CD300A/CEBPB/CLEC4E/CRH/CRTAM/CTSB/CTSC/CTSS/EGFR/EREG/FGA/FGB/FGG/GJA1/GRN/HCK/HSP90B1/ICAM2/ICAM3/IL12A/IL12B/IL17A/IL17RC/IL1B/IL1RL1/IL23A/KLK5/LDLR/LGMN/LILRA5/LYN/MAPKAPK2/MAPKAPK3/MED1/MICA/MICB/MMP12/NCR3/OSM/PDE2A/PGLYRP1/PRKACA/PSMA2/PSMA4/PSMD4/PTPRS/RELB/SERPINE1/SNX4/TLR2/TNF/TNFAIP3/TNFRSF1A/UBB/UBC/ULBP2
A	positive regulation of secretion by cell	54	5.49604e-08	Biological Process	54/839	344/11512	2.1576e-05	AGT/APBB1/BMP6/CADM1/CD33/CD38/CD58/CLEC4E/CRH/CRLF2/CRTAM/EGFR/FGA/FGB/FGG/FOXL2/GAL/GCG/GDNF/GJA1/GRP/HGS/HIF1A/IFNGR1/IL13/IL17A/IL17RC/IL1A/IL1B/IL1RL1/IL5/INHBA/INHBB/ITSN1/LGALS9/LILRA5/LRP1/MIF/MMP12/NMB/OSM/PRKCZ/RAB27A/RBP4/RETN/SNX4/SPP1/TGFB1/TGFB3/TLR2/TNF/TNFRSF14/TNFRSF4/UNC13A
A	salivary gland development	14	5.85623e-08	Biological Process	14/839	35/11512	2.1576e-05	BMP7/DAG1/EDAR/EGFR/FGF7/HGF/NRP1/PLXNA1/SEMA3A/SHH/TGFB1/TGFB3/TNF/TWSG1
A	regulation of STAT cascade	27	8.25671e-08	Biological Process	27/839	119/11512	2.83921e-05	AGT/CD300A/CRLF2/CSF2/CSH1/CSH2/EPO/ERBB4/FGFR3/GHR/HGS/IFNA10/IFNA14/IL10RA/IL12A/IL12B/IL13/IL23A/IL3/IL5/IL7R/LIF/LYN/OSM/PRLR/TNF/TNFRSF1A
A	extracellular matrix	70	1.35129e-10	Cellular Component	70/872	427/11816	3.96693e-08	A2M/AGT/APOA1/BMP7/CALR/CDH2/CDON/CFP/CHI3L1/CLC/CLU/CRELD1/CRISP3/CTSB/CTSC/CTSD/CTSS/CTSZ/DAG1/DPT/EFNA5/F3/FBLN1/FGA/FGB/FGF1/FGF9/FGG/FLRT3/FN1/GPC3/HSP90B1/IGFBP7/LAMC2/LGALS1/LGALS3/LGALS9/MEPE/MFAP5/MMP10/MMP12/MMP16/MMP17/MMP3/MMP7/MMRN2/NID1/NTN1/OMD/PI3/PLG/PLOD3/PRTN3/PTN/PTX3/S100A6/SEMA3B/SEMA7A/SERPINE1/SERPINF1/SHH/SPARCL1/SPOCK2/SPON1/TGFB1/TGFB3/THBS4/TIMP4/TNFRSF11B/TPSB2
A	external side of plasma membrane	53	1.51121e-10	Cellular Component	53/872	281/11816	3.96693e-08	ALCAM/CALR/CD226/CD27/CD33/CD3G/CD4/CD59/CD79A/CRLF2/CSF2RA/CSF3R/CTSV/CUBN/CXCL9/DAG1/EFNA5/F3/FASLG/FCGR2B/FGA/FGB/FGG/GFRA2/GHR/HHLA2/ICOS/ICOSLG/IL12B/IL12RB2/IL13/IL13RA1/IL17A/IL1R1/IL1RL1/IL27RA/IL7R/INSR/ITGA5/LDLR/MICA/MICB/NRCAM/PDCD1LG2/PDGFRA/PLG/PRLR/PRNP/SEMA7A/TNF/TNFRSF14/TNFRSF4/ULBP2
A	collagen-containing extracellular matrix	54	6.92832e-08	Cellular Component	54/872	342/11816	1.11683e-05	A2M/AGT/APOA1/BMP7/CALR/CDH2/CDON/CFP/CLC/CLU/CRELD1/CTSB/CTSC/CTSD/CTSS/CTSZ/DAG1/DPT/EFNA5/F3/FBLN1/FGA/FGB/FGF9/FGG/FN1/GPC3/HSP90B1/IGFBP7/LAMC2/LGALS1/LGALS3/LGALS9/MFAP5/MMRN2/NID1/NTN1/OMD/PLG/PLOD3/PRTN3/PTN/S100A6/SEMA3B/SEMA7A/SERPINE1/SERPINF1/SHH/SPARCL1/SPON1/TGFB1/TGFB3/THBS4/TPSB2
A	side of membrane	64	8.50921e-08	Cellular Component	64/872	438/11816	1.11683e-05	ALCAM/CALR/CD226/CD27/CD33/CD3G/CD4/CD59/CD79A/CISD1/CRLF2/CSF2RA/CSF3R/CTSV/CUBN/CXCL9/DAG1/EFNA5/F3/FASLG/FCGR2B/FGA/FGB/FGG/GFRA2/GHR/HCK/HHLA2/HTRA2/ICOS/ICOSLG/IL12B/IL12RB2/IL13/IL13RA1/IL17A/IL1R1/IL1RL1/IL27RA/IL7R/INSR/ITGA5/LDLR/LYN/MICA/MICB/NRCAM/PDCD1LG2/PDGFRA/PLG/PRLR/PRNP/PTEN/PTPN1/PTPN4/S100A6/SEMA7A/SNAP25/TAPBP/TNF/TNFRSF14/TNFRSF4/ULBP2/YES1
A	endoplasmic reticulum lumen	42	7.94136e-07	Cellular Component	42/872	257/11816	7.31863e-05	AFP/APOA1/APP/CALR/CD4/CDH2/CFP/CLU/COLGALT1/COLGALT2/CST3/CTSC/CTSZ/DAG1/DNAJB9/DNAJC10/ERP29/FGA/FGG/FKBP14/FN1/GCG/GOLM1/GPC3/HSP90B1/IGFBP7/IL12A/IL12B/IL23A/LGALS1/MEPE/PLAUR/PLOD3/POGLUT1/PROC/SDF2L1/SERPIND1/SHH/SPARCL1/SPON1/SPP1/STC2
A	vesicle lumen	47	8.36415e-07	Cellular Component	47/872	303/11816	7.31863e-05	A2M/ACLY/APOA1/APP/CALR/CAT/CFP/CHI3L1/CHIT1/CLU/CRISP3/CSNK2B/CTSC/CTSD/CTSZ/EGFR/FAF2/FASLG/FGA/FGB/FGG/FN1/GCG/GRN/GRP/HGF/HSP90AB1/HSP90B1/IMPDH2/LCN2/MIF/NPC2/PAFAH1B2/PGLYRP1/PLG/PRDX4/PRTN3/PSMA2/PTX3/QPCT/RAB27A/RETN/SERPINA4/SERPINE1/TGFB1/TGFB3/VTI1B
A	cytoplasmic vesicle lumen	46	1.83554e-06	Cellular Component	46/872	302/11816	0.000137666	A2M/ACLY/APOA1/APP/CALR/CAT/CFP/CHI3L1/CHIT1/CLU/CRISP3/CSNK2B/CTSC/CTSD/CTSZ/FAF2/FASLG/FGA/FGB/FGG/FN1/GCG/GRN/GRP/HGF/HSP90AB1/HSP90B1/IMPDH2/LCN2/MIF/NPC2/PAFAH1B2/PGLYRP1/PLG/PRDX4/PRTN3/PSMA2/PTX3/QPCT/RAB27A/RETN/SERPINA4/SERPINE1/TGFB1/TGFB3/VTI1B
A	secretory granule lumen	43	7.31959e-06	Cellular Component	43/872	289/11816	0.000480348	A2M/ACLY/APOA1/APP/CAT/CFP/CHI3L1/CHIT1/CLU/CRISP3/CSNK2B/CTSC/CTSD/CTSZ/FAF2/FGA/FGB/FGG/FN1/GCG/GRN/GRP/HGF/HSP90AB1/IMPDH2/LCN2/MIF/NPC2/PAFAH1B2/PGLYRP1/PLG/PRDX4/PRTN3/PSMA2/PTX3/QPCT/RAB27A/RETN/SERPINA4/SERPINE1/TGFB1/TGFB3/VTI1B
A	endosome lumen	10	2.49735e-05	Cellular Component	10/872	29/11816	0.00145679	AP4M1/APP/CD63/CSH1/CTSB/CTSS/IL12A/IL12B/LGMN/PRLR
A	receptor complex	46	3.1874e-05	Cellular Component	46/872	336/11816	0.00167338	ALCAM/APP/CD3G/CD4/CD79A/CRLF2/CSF2RA/CSF2RB/CSF3R/EGFR/EPHA1/EPHA2/EPHB4/ERBB3/ERBB4/FGFR3/FGFR4/GABBR2/GFRA2/GHR/HSP90AB1/HTRA2/IL12B/IL12RB2/IL13RA1/IL27RA/INSR/ITGA5/ITGAL/KDR/LDLR/LRP1/LRP8/LYN/MST1R/NRP1/NTRK1/NTRK3/PDGFRA/PIGR/PLXNA1/PRLR/PTH1R/TLR2/TNFRSF1A/TRAT1
A	receptor ligand activity	92	2.73943e-27	Molecular Function	92/827	370/11509	1.40435e-24	AGT/AMH/APOA1/BMP10/BMP6/BMP7/BTC/CCL13/CCL16/CCL23/CCL24/CCL25/CD70/CGA/CRH/CSF2/CSH1/CSH2/CXCL13/CXCL14/CXCL5/CXCL8/CXCL9/EFNA5/EPO/EREG/FASLG/FGF1/FGF17/FGF7/FGF9/FLRT3/GAL/GCG/GDF11/GDF5/GDNF/GNRH2/GRN/GRP/HAMP/HBEGF/HGF/IFNA10/IFNA14/IL12A/IL12B/IL13/IL16/IL17A/IL1A/IL1B/IL22/IL23A/IL3/IL37/IL5/INHBA/INHBB/INSL5/INSL6/KITLG/LGALS3/LIF/MIF/MSTN/NBL1/NMB/OSM/PGF/PSPN/PTN/RETN/SECTM1/SEMA3A/SEM…
A	receptor regulator activity	95	3.73994e-27	Molecular Function	95/827	393/11509	1.40435e-24	AGT/AMH/APOA1/APP/BMP10/BMP6/BMP7/BTC/CCL13/CCL16/CCL23/CCL24/CCL25/CD70/CGA/CRH/CSF2/CSH1/CSH2/CXCL13/CXCL14/CXCL5/CXCL8/CXCL9/DKK3/DKKL1/EFNA5/EPO/EREG/FASLG/FGF1/FGF17/FGF7/FGF9/FLRT3/GAL/GCG/GDF11/GDF5/GDNF/GNRH2/GRN/GRP/HAMP/HBEGF/HGF/IFNA10/IFNA14/IL12A/IL12B/IL13/IL16/IL17A/IL1A/IL1B/IL22/IL23A/IL3/IL37/IL5/INHBA/INHBB/INSL5/INSL6/KITLG/LGALS3/LIF/MIF/MSTN/NBL1/NMB/OSM/PGF/PSPN/PTN/RETN/SE…
A	cytokine activity	50	4.39235e-18	Molecular Function	50/827	174/11509	1.09955e-15	BMP10/BMP6/BMP7/CCL13/CCL16/CCL23/CCL24/CCL25/CD70/CSF2/CXCL13/CXCL14/CXCL5/CXCL8/CXCL9/EPO/FASLG/GDF11/GDF5/GRN/IFNA10/IFNA14/IL12A/IL12B/IL13/IL16/IL17A/IL1A/IL1B/IL22/IL23A/IL3/IL37/IL5/INHBA/INHBB/KITLG/LIF/MIF/MSTN/OSM/SECTM1/SLURP1/SPP1/TGFB1/TGFB3/TNF/TNFRSF11B/TNFSF8/TNFSF9
A	cytokine receptor binding	55	7.682e-15	Molecular Function	55/827	242/11509	1.4423e-12	AMH/BMP10/BMP6/BMP7/CASP3/CCL13/CCL16/CCL23/CCL24/CCL25/CD70/CSF2/CSH1/CSH2/CXCL13/CXCL14/CXCL5/CXCL8/CXCL9/EFNA5/EPO/FASLG/GDF11/GDF5/IFNA10/IFNA14/IL12A/IL12B/IL13/IL1A/IL1B/IL22/IL23A/IL3/IL37/IL5/INHBA/INHBB/ITGA5/KITLG/LIF/MIF/MSTN/NTRK1/OSM/PGF/PIK3R1/PLCG1/TFF2/TGFB1/TGFB3/TNF/TNFSF8/TNFSF9/TYK2
A	growth factor activity	37	4.42904e-12	Molecular Function	37/827	144/11509	6.65242e-10	AGT/AMH/BMP10/BMP6/BMP7/BTC/CSF2/CSH1/CSH2/EREG/FGF1/FGF17/FGF7/FGF9/GDF11/GDF5/GDNF/GRN/HBEGF/HGF/IL12A/IL12B/IL3/IL5/INHBA/INHBB/KITLG/LIF/MSTN/OSM/PGF/PSPN/PTN/TFF1/TGFB1/TGFB3/THBS4
A	transmembrane receptor protein tyrosine kinase activity	18	4.64579e-08	Molecular Function	18/827	57/11509	5.81498e-06	EFNA4/EFNB3/EGFR/EPHA1/EPHA2/EPHB4/ERBB3/ERBB4/FGFR3/FGFR4/INSR/KDR/MST1R/NRP1/NTRK1/NTRK3/PDGFRA/PDGFRL
A	hormone activity	23	1.3553e-07	Molecular Function	23/827	94/11509	1.45405e-05	AGT/AMH/BMP10/CCL25/CGA/CRH/CSH1/CSH2/EPO/GAL/GCG/GNRH2/GRP/HAMP/INHBA/INHBB/INSL5/INSL6/NMB/RETN/STC2/TG/TSHB
A	growth factor receptor binding	26	2.01542e-07	Molecular Function	26/827	118/11509	1.89198e-05	APP/BTC/CSF2/ERBB4/EREG/FGF1/FGF17/FGF7/FGF9/FLRT3/HBEGF/IL12A/IL12B/IL1A/IL1B/IL1R1/IL3/IL37/IL5/ITGA5/LYN/PDGFRA/PGF/PTEN/SNX4/YES1
A	cytokine receptor activity	21	6.04081e-07	Molecular Function	21/827	87/11509	5.04072e-05	CD4/CRLF2/CSF2RA/CSF2RB/CSF3R/F3/GFRA2/GHR/IFNGR1/IL10RA/IL12B/IL12RB2/IL13RA1/IL15RA/IL17RC/IL1R1/IL1R2/IL1RL1/IL27RA/IL7R/PRLR
A	growth factor binding	25	1.45502e-06	Molecular Function	25/827	122/11509	0.000109272	A2M/CSF3R/CXCL13/EGFR/ERBB3/FGFR3/FGFR4/FURIN/GHR/IGFBP6/IGFBP7/IL10RA/IL1R1/IL1R2/INSR/KDR/NGFR/NRP1/NTRK1/NTRK3/PDGFRA/PTN/SEC61B/TGFB3/TWSG1
B	positive regulation of cytokine production	38	1.59712e-21	Biological Process	38/169	380/11512	4.91593e-18	AGT/AGTR2/CD40/CD46/CSF2/DDX58/EIF2AK2/FLOT1/IFNG/IL10/IL12A/IL12B/IL13/IL1A/IL1R1/IL1RAP/IL2/IL23A/IL33/IL4/IL6/IL7/IL9/IRF7/LEP/LY96/MAVS/MYD88/NLRP3/TICAM1/TLR1/TLR2/TLR3/TLR4/TLR5/TLR6/TLR7/TLR8
B	defense response to virus	26	4.98084e-18	Biological Process	26/169	194/11512	7.66551e-15	CD40/DDX58/EIF2AK2/IFITM1/IFITM2/IFITM3/IFNA1/IFNA2/IFNA8/IFNAR2/IFNB1/IFNG/IFNW1/IL12B/IL23A/IL33/IL6/IRF7/MAVS/MX1/MX2/NLRP3/TICAM1/TLR3/TLR7/TLR8
B	JAK-STAT cascade	22	1.54635e-17	Biological Process	22/169	131/11512	1.58656e-14	AGT/CD40/CSF2/IFNA1/IFNA2/IFNA8/IFNAR1/IFNAR2/IFNB1/IFNG/IFNW1/IL10/IL12A/IL12B/IL13/IL2/IL23A/IL3/IL4/IL5/IL6/LEP
B	regulation of inflammatory response	31	2.30163e-17	Biological Process	31/169	316/11512	1.76346e-14	ACE2/ADA/ADORA1/AGT/AGTR1/C4BPA/CD46/CD55/CD59/CMA1/CR1/GHSR/IL10/IL12B/IL1R1/IL2/IL23A/IL33/IL4/IL6/LEP/MAS1/MYD88/NLRP3/PHB/TICAM1/TLR2/TLR3/TLR4/TLR6/TLR7
B	defense response to other organism	33	2.86462e-17	Biological Process	33/169	368/11512	1.76346e-14	CD40/DDX58/EIF2AK2/IFITM1/IFITM2/IFITM3/IFNA1/IFNA2/IFNA8/IFNAR2/IFNB1/IFNG/IFNW1/IL10/IL12A/IL12B/IL23A/IL33/IL6/IRF7/MAVS/MX1/MX2/MYD88/NLRP3/TICAM1/TLR2/TLR3/TLR4/TLR5/TLR6/TLR7/TLR8
B	STAT cascade	22	3.56354e-17	Biological Process	22/169	136/11512	1.8281e-14	AGT/CD40/CSF2/IFNA1/IFNA2/IFNA8/IFNAR1/IFNAR2/IFNB1/IFNG/IFNW1/IL10/IL12A/IL12B/IL13/IL2/IL23A/IL3/IL4/IL5/IL6/LEP
B	regulation of JAK-STAT cascade	20	2.43037e-16	Biological Process	20/169	115/11512	9.58721e-14	AGT/CD40/CSF2/IFNA1/IFNA2/IFNA8/IFNB1/IFNG/IFNW1/IL10/IL12A/IL12B/IL13/IL2/IL23A/IL3/IL4/IL5/IL6/LEP
B	response to virus	28	2.4918e-16	Biological Process	28/169	271/11512	9.58721e-14	CD40/DDX58/EIF2AK2/IFITM1/IFITM2/IFITM3/IFNA1/IFNA2/IFNA8/IFNAR1/IFNAR2/IFNB1/IFNG/IFNW1/IL12A/IL12B/IL23A/IL33/IL6/IRF7/MAVS/MX1/MX2/NLRP3/TICAM1/TLR3/TLR7/TLR8
B	cytokine biosynthetic process	19	3.055e-16	Biological Process	19/169	101/11512	1.04481e-13	CMA1/GHSR/IFNG/IL10/IL12B/IL1A/IL1RAP/IL4/IL6/IL9/IRF7/SIGIRR/TICAM1/TLR1/TLR3/TLR4/TLR6/TLR7/TLR8
B	cytokine metabolic process	19	3.7076e-16	Biological Process	19/169	102/11512	1.1412e-13	CMA1/GHSR/IFNG/IL10/IL12B/IL1A/IL1RAP/IL4/IL6/IL9/IRF7/SIGIRR/TICAM1/TLR1/TLR3/TLR4/TLR6/TLR7/TLR8
B	regulation of STAT cascade	20	4.87691e-16	Biological Process	20/169	119/11512	1.36465e-13	AGT/CD40/CSF2/IFNA1/IFNA2/IFNA8/IFNB1/IFNG/IFNW1/IL10/IL12A/IL12B/IL13/IL2/IL23A/IL3/IL4/IL5/IL6/LEP
B	positive regulation of JAK-STAT cascade	16	1.14777e-14	Biological Process	16/169	76/11512	2.94402e-12	AGT/CD40/CSF2/IFNA2/IFNG/IL10/IL12A/IL12B/IL13/IL2/IL23A/IL3/IL4/IL5/IL6/LEP
B	positive regulation of STAT cascade	16	2.20062e-14	Biological Process	16/169	79/11512	5.21039e-12	AGT/CD40/CSF2/IFNA2/IFNG/IL10/IL12A/IL12B/IL13/IL2/IL23A/IL3/IL4/IL5/IL6/LEP
B	leukocyte proliferation	25	4.28746e-14	Biological Process	25/169	256/11512	9.42628e-12	ACE/ADA/CD40/CD46/CD55/IFNA1/IFNA2/IFNA8/IFNB1/IFNW1/IL10/IL12A/IL12B/IL13/IL2/IL23A/IL33/IL4/IL5/IL6/IL7/LEP/TICAM1/TLR4/VCAM1
B	mononuclear cell proliferation	24	5.87549e-14	Biological Process	24/169	236/11512	1.20565e-11	ACE/ADA/CD40/CD46/CD55/IFNA1/IFNA2/IFNA8/IFNB1/IFNW1/IL10/IL12A/IL12B/IL13/IL2/IL23A/IL4/IL5/IL6/IL7/LEP/TICAM1/TLR4/VCAM1
B	external side of plasma membrane	18	1.05512e-07	Cellular Component	18/169	281/11816	2.17745e-05	ACE/ADA/ANPEP/CD33/CD40/CD5/CD59/CLCN3/ENPEP/FLOT1/IL12B/IL13/IL1R1/SCNN1B/SCNN1G/TLR4/TLR8/VCAM1
B	membrane region	18	1.7848e-07	Cellular Component	18/169	291/11816	2.17745e-05	ACE2/BSG/CD46/CD55/DPP4/ERLIN2/FLOT1/FLOT2/GHSR/NPHS2/SLC6A3/SLC9A1/STOM/STOML1/STOML2/TLR1/TLR2/TLR6
B	membrane raft	17	5.74584e-07	Cellular Component	17/169	282/11816	3.68319e-05	ACE2/BSG/CD55/DPP4/ERLIN2/FLOT1/FLOT2/GHSR/NPHS2/SLC6A3/SLC9A1/STOM/STOML1/STOML2/TLR1/TLR2/TLR6
B	membrane microdomain	17	6.03801e-07	Cellular Component	17/169	283/11816	3.68319e-05	ACE2/BSG/CD55/DPP4/ERLIN2/FLOT1/FLOT2/GHSR/NPHS2/SLC6A3/SLC9A1/STOM/STOML1/STOML2/TLR1/TLR2/TLR6
B	side of membrane	20	4.36405e-06	Cellular Component	20/169	438/11816	0.000212966	ACE/ADA/ANPEP/CD33/CD40/CD5/CD59/CLCN3/ENPEP/FLOT1/FRK/IL12B/IL13/IL1R1/NPHS2/SCNN1B/SCNN1G/TLR4/TLR8/VCAM1
B	secretory granule membrane	13	3.52762e-05	Cellular Component	13/169	237/11816	0.00143457	ADGRE5/ANPEP/BSG/CD33/CD46/CD55/CD59/CR1/FLOT2/ITGAX/PLAU/STOM/TLR2
B	endolysosome membrane	3	0.000435881	Cellular Component	3/169	11/11816	0.0151936	TLR3/TLR7/TLR8
B	apical part of cell	13	0.000557562	Cellular Component	13/169	313/11816	0.0170056	ABCB1/ANO1/CDHR2/CFTR/DPP4/ENPEP/FAP/SCNN1A/SCNN1B/SCNN1G/SLC10A2/SLC9A1/VCAM1
B	acrosomal membrane	3	0.000739772	Cellular Component	3/169	13/11816	0.020056	BSG/CD46/FLOT2
B	endosomal part	15	0.000835097	Cellular Component	15/169	412/11816	0.0203764	CFTR/CLCN3/IFITM3/IL12A/IL12B/IRAK4/IRF7/LY96/MYD88/STOML1/TICAM1/TLR3/TLR4/TLR7/TLR8
B	cytokine activity	23	5.75546e-16	Molecular Function	23/168	174/11509	1.85901e-13	CSF2/CXCL8/IFNA1/IFNA2/IFNA8/IFNB1/IFNG/IFNW1/IL10/IL12A/IL12B/IL13/IL19/IL1A/IL2/IL23A/IL3/IL33/IL4/IL5/IL6/IL7/IL9
B	cytokine receptor binding	25	1.01364e-14	Molecular Function	25/168	242/11509	1.63703e-12	CSF2/CXCL8/IFNA1/IFNA2/IFNA8/IFNB1/IFNG/IFNW1/IL10/IL12A/IL12B/IL13/IL1A/IL1RAP/IL2/IL23A/IL3/IL4/IL5/IL6/IL7/IL9/IRAK4/MYD88/TLR5
B	receptor regulator activity	30	6.21843e-14	Molecular Function	30/168	393/11509	6.69517e-12	AGRP/AGT/AGTR2/CSF2/CXCL8/GRP/IFNA1/IFNA2/IFNA8/IFNB1/IFNG/IFNW1/IL10/IL12A/IL12B/IL13/IL19/IL1A/IL2/IL23A/IL3/IL33/IL4/IL5/IL6/IL7/IL9/LEP/MLN/NMB
B	receptor ligand activity	29	8.75129e-14	Molecular Function	29/168	370/11509	7.06667e-12	AGRP/AGT/CSF2/CXCL8/GRP/IFNA1/IFNA2/IFNA8/IFNB1/IFNG/IFNW1/IL10/IL12A/IL12B/IL13/IL19/IL1A/IL2/IL23A/IL3/IL33/IL4/IL5/IL6/IL7/IL9/LEP/MLN/NMB
B	growth factor receptor binding	16	1.33016e-11	Molecular Function	16/168	118/11509	8.59281e-10	CSF2/IL10/IL12A/IL12B/IL1A/IL1R1/IL1RAP/IL2/IL3/IL4/IL5/IL6/IL7/IL9/IRAK4/TLR5
B	Toll-like receptor binding	5	2.68759e-07	Molecular Function	5/168	11/11509	1.44682e-05	LY96/MYD88/TLR1/TLR2/TLR6
B	sodium channel activity	7	3.86717e-07	Molecular Function	7/168	33/11509	1.78442e-05	ASIC1/ASIC2/ASIC4/SCNN1A/SCNN1B/SCNN1D/SCNN1G
B	exopeptidase activity	10	5.10661e-07	Molecular Function	10/168	87/11509	1.88636e-05	ACE/ACE2/ANPEP/APEH/DPP4/DPP8/ENPEP/FAP/PREP/PREPL
B	serine-type peptidase activity	12	5.25612e-07	Molecular Function	12/168	133/11509	1.88636e-05	ACE/APEH/CMA1/DPP4/DPP6/DPP8/FAP/MMP1/PLAU/PREP/PREPL/TMPRSS2
B	serine hydrolase activity	12	7.2424e-07	Molecular Function	12/168	137/11509	2.3393e-05	ACE/APEH/CMA1/DPP4/DPP6/DPP8/FAP/MMP1/PLAU/PREP/PREPL/TMPRSS2
Group A: candidate proteins for COVID-19 inactivation or aging marker proteins in plasma
Group B: candidate genes for COVID-19 infection, morbidity and clearance

## Sheet: ST6
Supplementary Table 6. Candidate nonsynonymous mutations within candidate genes in two populations with allele or genotype frequency of 1-5%
Gene	Chr	Pos	SNP	Ref	Alt	Freq	SIFT_pred	FATHMM_pred	Population	Group
ABCC6	16	16157674	rs58694313	C	T	T 0.0331	D	D	1000 Genome	A
ABCC6	16	16165739	rs41278174	G	A	A 0.0116	D	D	1000 Genome	A
ABCC6	16	16169805	rs61340537	G	T	T 0.0108	T	D	1000 Genome	A
ABCC6	16	16177500	rs6416668	T	C	T 0.0357	T	D	1000 Genome	A
ABCC6	16	16182435	rs59593133	T	C	C 0.0230	T	D	1000 Genome	A
ABCC6	16	16182488	rs58073789	C	T	T 0.0146	T	D	1000 Genome	A
ABCC6	16	16154934	rs57695665	C	T	CT 0.0108	D	D	1000 Genome	A
ABCC6	16	16165640	rs60707953	G	T	GT 0.0152	T	D	1000 Genome	A
ABCC6	16	16165739	rs41278174	G	A	GA 0.0232	D	D	1000 Genome	A
ABCC6	16	16169805	rs61340537	G	T	GT 0.0200	T	D	1000 Genome	A
ABCC6	16	16173364	rs60712230	C	G	CG 0.0184	T	D	1000 Genome	A
ABCC6	16	16182435	rs59593133	T	C	TC 0.0435	T	D	1000 Genome	A
ABCC6	16	16182488	rs58073789	C	T	CT 0.0268	T	D	1000 Genome	A
ABL2	1	179142975	rs202125612	G	T	T 0.0110	D	T	1000 Genome	A
ABL2	1	179108280	rs28913890	G	C	GC 0.0104	D	T	1000 Genome	A
ABL2	1	179108478	rs17277288	T	C	TC 0.0100	D	T	1000 Genome	A
ABL2	1	179142975	rs202125612	G	T	GT 0.0204	D	T	1000 Genome	A
ACLY	17	41893067	rs34533754	C	T	CT 0.0108	T	D	1000 Genome	A
ACP5	19	11576317	rs2229532	C	T	T 0.0433	T	D	1000 Genome	A
ADAMTS15	11	130462562	rs116897071	T	C	C 0.0210	D	T	1000 Genome	A
ADAMTS15	11	130449370	rs185269810	G	C	GC 0.0100	D	T	1000 Genome	A
ADAMTS15	11	130449676	rs61753090	G	A	GA 0.0164	D	D	1000 Genome	A
ADAMTS15	11	130462562	rs116897071	T	C	TC 0.0339	D	T	1000 Genome	A
ADAMTS4	1	161193676	rs147127522	G	A	GA 0.0104	D	T	1000 Genome	A
ADAMTS6	5	65172857	rs74464814	C	T	CT 0.0104	D	T	1000 Genome	A
ADGRF1	6	47009028	rs73736331	T	G	TG 0.0144	D	T	1000 Genome	A
ADH4	4	99143217	rs13125262	G	C	CC 0.0168	D	T	1000 Genome	A
ADSL	22	40354285	rs11089991	A	T	T 0.0162	T	D	1000 Genome	A
ADSL	22	40354285	rs11089991	A	T	AT 0.0315	T	D	1000 Genome	A
AFP	4	73445051	rs41265657	C	G	G 0.0146	D	D	1000 Genome	A
AFP	4	73445051	rs41265657	C	G	CG 0.0260	D	D	1000 Genome	A
AGT	1	230710231	rs4762	G	A	AA 0.0112	D	D	1000 Genome	A
ANGPT1	8	107321934	rs141029929	G	T	GT 0.0108	D	T	1000 Genome	A
ANGPTL4	19	8364439	rs116843064	G	A	GA 0.0180	D	T	1000 Genome	A
ANK2	4	113358518	rs34270799	C	A	A 0.0100	D	T	1000 Genome	A
ANK2	4	113358518	rs34270799	C	A	CA 0.0192	D	T	1000 Genome	A
APBB1	11	6411197	rs141737231	G	A	GA 0.0180	D	T	1000 Genome	A
APPL1	3	57269656	rs11544593	A	G	GG 0.0116	D	T	1000 Genome	A
ARHGEF1	19	41898444	rs2303797	C	T	CT 0.0116	D	T	1000 Genome	A
ARHGEF25	12	57610287	rs113892147	G	A	A 0.0102	D	T	1000 Genome	A
ARHGEF25	12	57610287	rs113892147	G	A	GA 0.0204	D	T	1000 Genome	A
ARHGEF25	12	57611899	rs60586224	G	A	AA 0.0431	D	T	1000 Genome	A
ARL11	13	49631029	rs35835937	G	C	GC 0.0152	D	T	1000 Genome	A
ARMC5	16	31458422	rs115527944	G	A	A 0.0148	D	T	1000 Genome	A
ARMC5	16	31458422	rs115527944	G	A	GA 0.0280	D	T	1000 Genome	A
ARSK	5	95555355	rs61733082	G	C	C 0.0130	T	D	1000 Genome	A
ARSK	5	95555355	rs61733082	G	C	GC 0.0236	T	D	1000 Genome	A
ASTL	2	96132701	rs61735195	C	T	CT 0.0132	D	T	1000 Genome	A
ATP2A3	17	3941051	rs9895012	G	A	A 0.0130	T	D	1000 Genome	A
ATP2A3	17	3930386	rs73330907	C	T	TT 0.0140	T	D	1000 Genome	A
ATP2A3	17	3941051	rs9895012	G	A	GA 0.0244	T	D	1000 Genome	A
ATP2A3	17	3943438	rs9913158	C	T	CT 0.0188	T	D	1000 Genome	A
AXIN2	17	65537421	rs9913621	C	T	T 0.0146	D	T	1000 Genome	A
AXIN2	17	65537801	rs115931022	T	C	C 0.0110	T	D	1000 Genome	A
AXIN2	17	65537421	rs9913621	C	T	CT 0.0268	D	T	1000 Genome	A
AXIN2	17	65537801	rs115931022	T	C	TC 0.0204	T	D	1000 Genome	A
BARD1	2	214730440	rs3738888	G	A	GA 0.0108	D	T	1000 Genome	A
BIN1	2	127050500	rs112318500	G	A	A 0.0339	D	T	1000 Genome	A
BIRC5	17	78223530	rs17880183	C	T	CT 0.0124	D	T	1000 Genome	A
BIRC5	17	78223604	rs17885521	G	C	GC 0.0108	D	T	1000 Genome	A
BRDT	1	92002069	rs78267346	A	G	G 0.0112	D	T	1000 Genome	A
BRDT	1	91977138	rs1156281	A	C	CC 0.0487	D	T	1000 Genome	A
BRDT	1	92002069	rs78267346	A	G	AG 0.0216	D	T	1000 Genome	A
C1orf210	1	43283086	rs115885647	A	T	AT 0.0172	D	T	1000 Genome	A
C1orf210	1	43283092	rs35465732	G	A	GA 0.0116	D	T	1000 Genome	A
C1QBP	17	5434961	rs56014026	G	A	GA 0.0136	D	.	1000 Genome	A
C2	6	31936027	rs9332739	G	C	C 0.0298	T	D	1000 Genome	A
C6orf226	6	42890505	rs145346317	G	A	GA 0.0108	D	.	1000 Genome	A
C7	5	40936439	rs2271708	T	C	C 0.0262	D	T	1000 Genome	A
C7	5	40936439	rs2271708	T	C	TC 0.0499	D	T	1000 Genome	A
C8orf33	8	145054093	rs7812316	C	G	CG 0.0108	D	.	1000 Genome	A
CA1	8	85333547	rs7821248	G	A	A 0.0238	D	T	1000 Genome	A
CA1	8	85328622	rs78898210	T	C	TC 0.0132	D	T	1000 Genome	A
CA1	8	85332503	rs61734485	G	A	GA 0.0148	D	T	1000 Genome	A
CA1	8	85333547	rs7821248	G	A	GA 0.0443	D	T	1000 Genome	A
CADM1	11	115504382	rs112835318	C	G	G 0.0172	D	T	1000 Genome	A
CADM1	11	115504382	rs112835318	C	G	CG 0.0327	D	T	1000 Genome	A
CASS4	20	56445943	rs77627768	C	T	CT 0.0140	D	T	1000 Genome	A
CBR3	21	36135442	rs9282628	C	G	G 0.0367	T	D	1000 Genome	A
CCDC80	3	112639811	rs75074453	C	T	T 0.0363	D	T	1000 Genome	A
CCL25	19	8053054	rs571194324	A	C	C 0.0172	D	T	1000 Genome	A
CCL25	19	8056208	rs143413416	C	T	T 0.0148	D	T	1000 Genome	A
CCL25	19	8053054	rs571194324	A	C	AC 0.0343	D	T	1000 Genome	A
CCL25	19	8056208	rs143413416	C	T	CT 0.0296	D	T	1000 Genome	A
CD109	6	73787379	rs35466124	G	A	A 0.0168	D	T	1000 Genome	A
CD109	6	73811140	rs61754903	C	T	T 0.0264	D	T	1000 Genome	A
CD109	6	73730549	rs61730425	A	C	AC 0.0136	D	T	1000 Genome	A
CD109	6	73736491	rs148575660	A	G	AG 0.0104	D	T	1000 Genome	A
CD109	6	73787271	rs79433097	T	G	TG 0.0156	D	T	1000 Genome	A
CD109	6	73787379	rs35466124	G	A	GA 0.0335	D	T	1000 Genome	A
CD109	6	73806908	rs35630075	G	A	GA 0.0148	D	T	1000 Genome	A
CD109	6	73811140	rs61754903	C	T	CT 0.0463	D	T	1000 Genome	A
CD226	18	69895704	rs75602338	C	T	CT 0.0120	D	T	1000 Genome	A
CD27	12	6445462	rs25680	G	A	AA 0.0300	T	D	1000 Genome	A
CD300C	17	74542888	rs147686810	T	C	TC 0.0132	D	T	1000 Genome	A
CD300C	17	74544797	rs11870245	G	A	AA 0.0272	D	T	1000 Genome	A
CD48	1	160679062	rs16832307	A	G	AG 0.0156	D	T	1000 Genome	A
CDH15	16	89187483	rs142647750	C	T	CT 0.0152	D	T	1000 Genome	A
CDHR1	10	84203068	rs7086200	C	T	T 0.0308	D	T	1000 Genome	A
CDNF	10	14820083	rs61738953	C	G	G 0.0136	D	.	1000 Genome	A
CDNF	10	14820083	rs61738953	C	G	CG 0.0264	D	.	1000 Genome	A
CDON	11	126015388	rs35665264	G	C	C 0.0150	D	T	1000 Genome	A
CDON	11	126015388	rs35665264	G	C	GC 0.0276	D	T	1000 Genome	A
CFB	6	31946247	rs4151667	T	A	A 0.0300	D	T	1000 Genome	A
CFB	6	31950377	rs149101394	A	G	G 0.0192	T	D	1000 Genome	A
CFB	6	31951241	rs4151660	T	G	G 0.0104	T	D	1000 Genome	A
CFB	6	31946403	rs641153	G	A	AA 0.0212	T	D	1000 Genome	A
CFB	6	31950377	rs149101394	A	G	AG 0.0335	T	D	1000 Genome	A
CFB	6	31951241	rs4151660	T	G	TG 0.0208	T	D	1000 Genome	A
CHI3L2	1	111235708	rs34049547	G	A	GA 0.0180	D	T	1000 Genome	A
CHIT1	1	203217835	rs9943208	C	T	T 0.0254	D	D	1000 Genome	A
CHIT1	1	203219815	rs61745299	G	C	C 0.0216	D	T	1000 Genome	A
CHIT1	1	203217835	rs9943208	C	T	CT 0.0491	D	D	1000 Genome	A
CHIT1	1	203219815	rs61745299	G	C	GC 0.0383	D	T	1000 Genome	A
CHST15	10	124044776	rs34389704	G	C	GC 0.0144	D	.	1000 Genome	A
CHST3	10	72008191	rs145384892	G	A	GA 0.0132	T	D	1000 Genome	A
CLC	19	39734391	rs146776010	G	C	C 0.0176	D	T	1000 Genome	A
CLC	19	39734391	rs146776010	G	C	GC 0.0264	D	T	1000 Genome	A
CLU	8	27599995	rs9331936	T	G	GG 0.0152	D	T	1000 Genome	A
CNEP1R1	16	50025669	rs76218980	T	C	TC 0.0132	D	.	1000 Genome	A
CNTNAP1	17	42688983	rs35437096	G	C	C 0.0403	D	T	1000 Genome	A
COG8	16	69331089	rs114861924	G	A	GA 0.0172	D	T	1000 Genome	A
COL6A5	3	130376336	rs113396273	T	C	C 0.0104	D	T	1000 Genome	A
COL6A5	3	130403649	rs114408026	A	G	G 0.0126	D	D	1000 Genome	A
COL6A5	3	130405625	rs77730506	G	A	A 0.0110	D	D	1000 Genome	A
COL6A5	3	130416800	rs76864445	C	A	A 0.0391	T	D	1000 Genome	A
COL6A5	3	130469371	rs115907998	A	T	T 0.0104	D	D	1000 Genome	A
COL6A5	3	130471687	rs79145375	T	C	C 0.0264	D	T	1000 Genome	A
COL6A5	3	130376336	rs113396273	T	C	TC 0.0208	D	T	1000 Genome	A
COL6A5	3	130388639	rs9882852	A	C	AC 0.0148	T	D	1000 Genome	A
COL6A5	3	130403649	rs114408026	A	G	AG 0.0236	D	D	1000 Genome	A
COL6A5	3	130405625	rs77730506	G	A	GA 0.0212	D	D	1000 Genome	A
COL6A5	3	130410478	rs35886424	G	C	CC 0.0100	T	D	1000 Genome	A
COL6A5	3	130469371	rs115907998	A	T	AT 0.0200	D	D	1000 Genome	A
COL6A5	3	130471687	rs79145375	T	C	TC 0.0495	D	T	1000 Genome	A
COLGALT1	19	17579483	rs544877640	T	G	G 0.0232	D	T	1000 Genome	A
COLGALT1	19	17579483	rs544877640	T	G	TG 0.0463	D	T	1000 Genome	A
COMMD1	2	62000878	rs55677935	C	T	CT 0.0116	D	T	1000 Genome	A
CRELD1	3	9938029	rs2302787	C	G	G 0.0122	D	T	1000 Genome	A
CRELD1	3	9938029	rs2302787	C	G	CG 0.0244	D	T	1000 Genome	A
CRTAM	11	122855722	rs35136295	A	G	G 0.0170	D	T	1000 Genome	A
CRTAM	11	122855722	rs35136295	A	G	AG 0.0323	D	T	1000 Genome	A
CSF2RB	22	36937615	rs1801122	C	A	A 0.0108	D	D	1000 Genome	A
CSF2RB	22	36937894	rs16997517	C	T	T 0.0485	T	D	1000 Genome	A
CSF2RB	22	36935634	rs200069235	C	T	CT 0.0104	D	D	1000 Genome	A
CSF2RB	22	36937615	rs1801122	C	A	CA 0.0208	D	D	1000 Genome	A
CSF3R	1	36468114	rs3917996	A	G	AG 0.0120	D	T	1000 Genome	A
CSH1	17	63896230	rs200765645	G	A	A 0.0206	T	D	1000 Genome	A
CSH1	17	63895805	rs572913084	C	T	CT 0.0164	T	D	1000 Genome	A
CSH1	17	63896230	rs200765645	G	A	GA 0.0355	T	D	1000 Genome	A
CST5	20	23877579	rs149503666	C	T	CT 0.0120	D	T	1000 Genome	A
CST8	20	23491822	rs35190670	C	T	T 0.0210	D	T	1000 Genome	A
CST8	20	23491822	rs35190670	C	T	CT 0.0371	D	T	1000 Genome	A
CTRL	16	67930458	rs11552953	G	A	AA 0.0108	.	D	1000 Genome	A
CTRL	16	67931196	rs140026167	C	T	CT 0.0168	.	D	1000 Genome	A
CTSB	8	11847141	rs17573	C	T	T 0.0447	T	D	1000 Genome	A
CTSB	8	11845144	rs117613666	T	G	TG 0.0120	D	T	1000 Genome	A
CTSB	8	11850970	rs74996838	T	C	TC 0.0108	T	D	1000 Genome	A
CTSV	9	97036645	rs77372598	C	G	CG 0.0100	T	D	1000 Genome	A
CUBN	10	16890491	rs1801238	G	T	T 0.0140	D	T	1000 Genome	A
CUBN	10	16919996	rs2271460	A	C	C 0.0337	D	T	1000 Genome	A
CUBN	10	17129177	rs12259370	C	T	T 0.0216	D	T	1000 Genome	A
CUBN	10	16851407	rs57163243	G	C	GC 0.0148	D	T	1000 Genome	A
CUBN	10	16888420	rs45569534	C	G	CG 0.0120	D	T	1000 Genome	A
CUBN	10	16890385	rs45551835	G	A	GA 0.0120	D	T	1000 Genome	A
CUBN	10	16890491	rs1801238	G	T	GT 0.0264	D	T	1000 Genome	A
CUBN	10	16918684	rs140806389	T	A	TA 0.0164	D	T	1000 Genome	A
CUBN	10	16925587	rs62619939	C	G	GG 0.0168	D	T	1000 Genome	A
CUBN	10	16937607	rs2356590	G	T	TT 0.0140	D	T	1000 Genome	A
CUBN	10	17110931	rs57335729	C	T	CT 0.0100	T	D	1000 Genome	A
CUBN	10	17111024	rs78201384	C	T	CT 0.0184	T	D	1000 Genome	A
CUBN	10	17114152	rs1801222	A	G	AA 0.0459	T	D	1000 Genome	A
CUBN	10	17129177	rs12259370	C	T	CT 0.0423	D	T	1000 Genome	A
CUL4B	X	120559782	rs113213082	C	T	TT 0.0181	D	T	1000 Genome	A
CUL9	6	43220862	rs11962520	C	T	CT 0.0184	D	D	1000 Genome	A
CXCL16	17	4739332	rs151229852	C	G	CG 0.0144	D	T	1000 Genome	A
DAG1	3	49510793	rs116717961	A	G	AG 0.0112	T	D	1000 Genome	A
DDC	7	50528222	rs6262	G	A	A 0.0128	D	T	1000 Genome	A
DDC	7	50528222	rs6262	G	A	GA 0.0248	D	T	1000 Genome	A
DEFB135	8	11984510	rs73663074	G	A	A 0.0439	D	T	1000 Genome	A
DKK3	11	11964597	rs114873269	T	C	C 0.0218	D	T	1000 Genome	A
DKK3	11	11964536	rs77775330	G	C	GC 0.0104	D	T	1000 Genome	A
DKK3	11	11964597	rs114873269	T	C	TC 0.0403	D	T	1000 Genome	A
DKKL1	19	49365635	rs35693137	C	A	A 0.0427	D	T	1000 Genome	A
DKKL1	19	49374796	rs111233735	G	A	A 0.0146	D	T	1000 Genome	A
DKKL1	19	49374796	rs111233735	G	A	GA 0.0292	D	T	1000 Genome	A
DKKL1	19	49374825	rs141628956	C	T	CT 0.0120	D	T	1000 Genome	A
DLL1	6	170283949	rs16901311	C	T	T 0.0132	D	D	1000 Genome	A
DLL1	6	170283949	rs16901311	C	T	CT 0.0256	D	D	1000 Genome	A
DNASE2B	1	84402058	rs72943980	T	C	C 0.0130	D	T	1000 Genome	A
DNASE2B	1	84414744	rs76042396	G	A	A 0.0351	D	T	1000 Genome	A
DNASE2B	1	84402058	rs72943980	T	C	TC 0.0244	D	T	1000 Genome	A
DOCK9	13	98848625	rs147025665	T	C	TC 0.0112	D	T	1000 Genome	A
DOK2	8	21911921	rs56094005	A	G	G 0.0118	D	T	1000 Genome	A
DOK2	8	21909729	rs34215892	G	A	GA 0.0192	D	T	1000 Genome	A
DOK2	8	21909754	rs74909419	G	A	GA 0.0108	D	D	1000 Genome	A
DOK2	8	21911921	rs56094005	A	G	AG 0.0228	D	T	1000 Genome	A
DOK2	8	21912500	rs201025320	C	T	CT 0.0104	D	T	1000 Genome	A
DPT	1	168729060	rs998688	C	T	T 0.0148	D	T	1000 Genome	A
DPT	1	168729060	rs998688	C	T	CT 0.0248	D	T	1000 Genome	A
DPYSL3	5	147509602	rs190349455	G	A	GA 0.0128	D	D	1000 Genome	A
DPYSL5	2	26944749	rs41288789	G	A	A 0.0148	T	D	1000 Genome	A
DPYSL5	2	26944749	rs41288789	G	A	GA 0.0296	T	D	1000 Genome	A
DSC3	18	31024408	rs35630063	T	C	C 0.0110	D	T	1000 Genome	A
DSC3	18	31032263	rs2852003	G	T	T 0.0343	D	T	1000 Genome	A
DSC3	18	31024408	rs35630063	T	C	TC 0.0188	D	T	1000 Genome	A
EDA2R	X	66602765	rs1385698	T	C	TT 0.0220	T	D	1000 Genome	A
EDAR	2	108929235	rs61761321	T	C	C 0.0188	T	D	1000 Genome	A
EDAR	2	108897116	rs146567337	T	G	TG 0.0120	D	D	1000 Genome	A
EDAR	2	108910527	rs79798733	C	T	CT 0.0136	D	D	1000 Genome	A
EDAR	2	108929235	rs61761321	T	C	TC 0.0319	T	D	1000 Genome	A
EFCAB14	1	46683335	rs75241822	C	G	G 0.0160	D	T	1000 Genome	A
EFCAB14	1	46683335	rs75241822	C	G	CG 0.0312	D	T	1000 Genome	A
EFCAB14	1	46686848	rs6665021	A	G	AG 0.0152	T	D	1000 Genome	A
EFNB1	X	68840026	rs16989105	T	C	C 0.0199	T	D	1000 Genome	A
EFNB1	X	68839969	rs147599832	C	T	CT 0.0134	T	D	1000 Genome	A
EFNB1	X	68840026	rs16989105	T	C	TC 0.0354	T	D	1000 Genome	A
EGFR	7	55170534	rs10258568	C	T	T 0.0371	D	T	1000 Genome	A
EHD4	15	41943118	rs11549015	C	T	TT 0.0136	T	D	1000 Genome	A
EMILIN3	20	41366471	rs192531993	T	G	G 0.0128	D	T	1000 Genome	A
EMILIN3	20	41362071	rs61739310	G	A	AA 0.0124	D	T	1000 Genome	A
EMILIN3	20	41366471	rs192531993	T	G	TG 0.0256	D	T	1000 Genome	A
ENPP7	17	79735220	rs80066859	C	G	CG 0.0188	D	D	1000 Genome	A
EPHA1	7	143395176	rs34372369	G	A	A 0.0313	D	D	1000 Genome	A
EPHA1	7	143398793	rs57652656	G	C	GC 0.0108	T	D	1000 Genome	A
EPHA2	1	16137994	rs34192549	C	T	T 0.0186	D	T	1000 Genome	A
EPHA2	1	16130268	rs35903225	C	T	CT 0.0156	D	T	1000 Genome	A
EPHA2	1	16135086	rs55747232	G	A	GA 0.0108	D	T	1000 Genome	A
EPHA2	1	16137994	rs34192549	C	T	CT 0.0355	D	T	1000 Genome	A
EPHB4	7	100819742	rs55720981	G	A	GA 0.0112	T	D	1000 Genome	A
ETHE1	19	43527117	rs116440799	C	A	A 0.0234	T	D	1000 Genome	A
ETHE1	19	43527117	rs116440799	C	A	CA 0.0435	T	D	1000 Genome	A
EVL	14	100135929	rs34073270	C	G	G 0.0325	D	T	1000 Genome	A
EVPL	17	76007209	rs577682130	C	G	G 0.0166	D	T	1000 Genome	A
EVPL	17	76023599	rs78044548	C	T	T 0.0473	D	T	1000 Genome	A
EVPL	17	76007209	rs577682130	C	G	CG 0.0331	D	T	1000 Genome	A
EVPL	17	76018553	rs7218767	G	T	TT 0.0148	D	T	1000 Genome	A
EVPL	17	76022516	rs10445216	T	C	TC 0.0156	D	T	1000 Genome	A
EVPL	17	76023372	rs150149800	G	A	GA 0.0156	D	T	1000 Genome	A
F3	1	94530506	rs3789683	C	T	T 0.0148	D	T	1000 Genome	A
F3	1	94530506	rs3789683	C	T	CT 0.0280	D	T	1000 Genome	A
F3	1	94536099	rs143237190	T	C	TC 0.0128	D	T	1000 Genome	A
FAM171B	2	186751157	rs79964543	C	T	T 0.0110	D	T	1000 Genome	A
FAM171B	2	186751157	rs79964543	C	T	CT 0.0204	D	T	1000 Genome	A
FARS2	6	5368740	rs34382405	C	G	CG 0.0164	D	T	1000 Genome	A
FBLN1	22	45550608	rs142867241	G	A	GA 0.0108	T	D	1000 Genome	A
FBLN1	22	45600418	rs13268	A	G	AG 0.0148	T	D	1000 Genome	A
FCGR1A	1	149784065	rs7531523	G	A	GA 0.0100	D	T	1000 Genome	A
FCN2	9	134887245	rs7851696	G	T	TT 0.0272	D	T	1000 Genome	A
FCRL6	1	159809675	rs116277008	C	T	TT 0.0120	D	T	1000 Genome	A
FEN1	11	61795891	rs552145732	C	A	A 0.0110	D	T	1000 Genome	A
FEN1	11	61795891	rs552145732	C	A	CA 0.0220	D	T	1000 Genome	A
FGA	4	154586525	rs200203992	G	C	GC 0.0148	D	T	1000 Genome	A
FGG	4	154610181	rs2066870	A	G	G 0.0232	T	D	1000 Genome	A
FGG	4	154610181	rs2066870	A	G	AG 0.0423	T	D	1000 Genome	A
FLNA	X	154354639	rs57108893	C	T	T 0.0426	T	D	1000 Genome	A
FLNA	X	154361480	rs17091204	G	A	A 0.0437	D	D	1000 Genome	A
FLNA	X	154365245	rs143873938	C	T	CT 0.0173	D	D	1000 Genome	A
FLNA	X	154366167	rs36051194	G	A	GA 0.0102	D	D	1000 Genome	A
FLRT3	20	14326373	rs36034779	T	G	TG 0.0148	D	T	1000 Genome	A
FN1	2	215409733	rs79328281	G	A	GA 0.0120	D	T	1000 Genome	A
FN1	2	215435747	rs143438305	G	A	GA 0.0164	D	T	1000 Genome	A
FRZB	2	182838608	rs288326	G	A	A 0.0439	D	T	1000 Genome	A
FRZB	2	182834857	rs7775	G	C	CC 0.0284	D	T	1000 Genome	A
FURIN	15	90876510	rs116359616	G	A	GA 0.0148	D	T	1000 Genome	A
FUT10	8	33453417	rs16880994	G	A	A 0.0379	D	T	1000 Genome	A
GAL	11	68690979	rs36058701	C	T	CT 0.0156	D	T	1000 Genome	A
GAPDHS	19	35538338	rs61745734	G	T	T 0.0114	D	T	1000 Genome	A
GAPDHS	19	35538338	rs61745734	G	T	GT 0.0220	D	T	1000 Genome	A
GDF5	20	35437432	rs61754581	G	T	T 0.0315	D	T	1000 Genome	A
GHR	5	42718826	rs6182	G	T	TT 0.0120	D	T	1000 Genome	A
GHR	5	42718990	rs6183	C	A	CA 0.0164	D	T	1000 Genome	A
GNGT2	17	49207373	rs35638197	T	C	C 0.0178	D	T	1000 Genome	A
GNGT2	17	49207390	rs9895097	C	A	A 0.0138	D	T	1000 Genome	A
GNGT2	17	49207373	rs35638197	T	C	TC 0.0315	D	T	1000 Genome	A
GNGT2	17	49207390	rs9895097	C	A	CA 0.0276	D	T	1000 Genome	A
GOLM1	9	86035417	rs61741197	C	G	G 0.0497	D	T	1000 Genome	A
GOLM1	9	86035417	rs61741197	C	G	GG 0.0104	D	T	1000 Genome	A
GYPA	4	144140604	rs147343123	A	G	AG 0.0180	D	T	1000 Genome	A
GZMA	5	55108129	rs3104233	T	C	T 0.0188	T	D	1000 Genome	A
GZMA	5	55108225	rs2270627	G	T	T 0.0102	D	T	1000 Genome	A
GZMA	5	55108350	rs61730831	A	G	G 0.0146	D	D	1000 Genome	A
GZMA	5	55108129	rs3104233	T	C	TC 0.0359	T	D	1000 Genome	A
GZMA	5	55108225	rs2270627	G	T	GT 0.0204	D	T	1000 Genome	A
GZMA	5	55108350	rs61730831	A	G	AG 0.0284	D	D	1000 Genome	A
HCK	20	32093878	rs114505022	G	A	A 0.0104	D	D	1000 Genome	A
HCK	20	32093878	rs114505022	G	A	GA 0.0192	D	D	1000 Genome	A
HGD	3	120674935	rs138846036	C	A	A 0.0134	T	D	1000 Genome	A
HGD	3	120674935	rs138846036	C	A	CA 0.0260	T	D	1000 Genome	A
HHLA2	3	108353482	rs58233893	T	G	G 0.0100	D	T	1000 Genome	A
HHLA2	3	108353482	rs58233893	T	G	TG 0.0192	D	T	1000 Genome	A
HHLA2	3	108362370	rs3792332	C	A	AA 0.0132	D	T	1000 Genome	A
HHLA2	3	108376508	rs77035676	C	T	CT 0.0124	D	T	1000 Genome	A
HLA-DQA2	6	32745267	rs79517313	C	T	T 0.0329	D	T	1000 Genome	A
HLA-DQA2	6	32746290	rs17213351	G	A	A 0.0315	D	T	1000 Genome	A
HNF4A	20	44413724	rs1800961	C	T	T 0.0240	T	D	1000 Genome	A
HNF4A	20	44413724	rs1800961	C	T	CT 0.0447	T	D	1000 Genome	A
HNF4A	20	44414519	rs142204928	G	A	GA 0.0120	T	D	1000 Genome	A
HPGDS	4	94302198	rs34124298	A	G	AG 0.0124	D	T	1000 Genome	A
HS3ST3B1	17	14345560	rs9906590	G	A	A 0.0142	T	D	1000 Genome	A
HS3ST3B1	17	14301571	rs200257944	T	A	TA 0.0100	D	T	1000 Genome	A
HS3ST3B1	17	14345560	rs9906590	G	A	GA 0.0284	T	D	1000 Genome	A
HS3ST4	16	26136133	rs9930821	G	T	T 0.0343	T	D	1000 Genome	A
HSD17B14	19	48815123	rs35299026	G	A	A 0.0158	D	T	1000 Genome	A
HSD17B14	19	48815123	rs35299026	G	A	GA 0.0284	D	T	1000 Genome	A
HSP90B1	12	103938446	rs116891695	C	T	CT 0.0120	D	T	1000 Genome	A
HTN1	4	70055510	rs61744465	T	C	C 0.0200	D	T	1000 Genome	A
HTN1	4	70055510	rs61744465	T	C	TC 0.0359	D	T	1000 Genome	A
ICOS	2	203936854	rs77411896	C	T	CT 0.0144	D	.	1000 Genome	A
IFIT2	10	89306849	rs61729485	T	C	TC 0.0180	D	T	1000 Genome	A
IFNA10	9	21206744	rs112963053	G	T	T 0.0154	D	T	1000 Genome	A
IFNA10	9	21206744	rs112963053	G	T	GT 0.0284	D	T	1000 Genome	A
IFNGR1	6	137215318	rs1327475	G	A	AA 0.0104	D	D	1000 Genome	A
IL10RA	11	117995597	rs41354146	G	A	GA 0.0144	D	T	1000 Genome	A
IL12B	5	159316780	rs3213119	C	A	A 0.0120	D	T	1000 Genome	A
IL12B	5	159316780	rs3213119	C	A	CA 0.0232	D	T	1000 Genome	A
IL12RB2	1	67351018	rs61731150	C	T	CT 0.0160	D	T	1000 Genome	A
IL16	15	81290495	rs200730945	G	A	A 0.0136	D	T	1000 Genome	A
IL16	15	81299475	rs34460207	A	G	G 0.0118	D	T	1000 Genome	A
IL16	15	81290495	rs200730945	G	A	GA 0.0272	D	T	1000 Genome	A
IL16	15	81299475	rs34460207	A	G	AG 0.0236	D	T	1000 Genome	A
IL1A	2	112779574	rs3783581	C	T	CT 0.0112	D	T	1000 Genome	A
IL1RL1	2	102339014	rs34210856	C	T	CT 0.0164	D	T	1000 Genome	A
IL27RA	19	14050824	rs76543168	C	T	T 0.0292	D	T	1000 Genome	A
IL27RA	19	14046453	rs61355201	G	C	GC 0.0152	D	T	1000 Genome	A
IL3	5	132060713	rs35415145	C	T	CT 0.0168	D	T	1000 Genome	A
IL37	2	112918606	rs28947200	C	T	CT 0.0152	D	T	1000 Genome	A
IL7R	5	35876347	rs2229232	C	T	T 0.0138	D	T	1000 Genome	A
IL7R	5	35874473	rs6897932	C	T	TT 0.0359	T	D	1000 Genome	A
IL7R	5	35876347	rs2229232	C	T	CT 0.0252	D	T	1000 Genome	A
INSL5	1	66801073	rs549148	T	A	TT 0.0240	T	D	1000 Genome	A
INSL6	9	5185460	rs62620190	G	A	A 0.0228	T	D	1000 Genome	A
INSL6	9	5185460	rs62620190	G	A	GA 0.0415	T	D	1000 Genome	A
INSR	19	7125507	rs1799816	C	T	CT 0.0100	D	D	1000 Genome	A
IRF6	1	209790735	rs2235371	C	T	TT 0.0495	D	D	1000 Genome	A
ITGAL	16	30481502	rs1064524	C	T	T 0.0120	D	D	1000 Genome	A
ITGAL	16	30481502	rs1064524	C	T	CT 0.0232	D	D	1000 Genome	A
KCNA10	1	110518027	rs11806812	T	C	C 0.0300	T	D	1000 Genome	A
KCNA10	1	110517286	rs56171965	T	C	TC 0.0172	T	D	1000 Genome	A
KCNA10	1	110517670	rs146624318	C	T	CT 0.0108	D	D	1000 Genome	A
KCNA10	1	110518444	rs150926393	C	T	CT 0.0112	D	T	1000 Genome	A
KCNA10	1	110518708	rs115598075	C	T	CT 0.0168	D	D	1000 Genome	A
KDR	4	55106779	rs34231037	A	G	AG 0.0180	D	T	1000 Genome	A
KIAA1324L	7	86909913	rs34321015	A	G	G 0.0152	D	T	1000 Genome	A
KIAA1324L	7	87059504	rs186388170	G	A	A 0.0192	D	T	1000 Genome	A
KIAA1324L	7	86909913	rs34321015	A	G	AG 0.0296	D	T	1000 Genome	A
KIAA1324L	7	87059504	rs186388170	G	A	GA 0.0359	D	T	1000 Genome	A
KLK14	19	51078155	rs201296079	T	C	TC 0.0100	D	D	1000 Genome	A
KLK14	19	51079628	rs61998181	C	T	CT 0.0124	D	D	1000 Genome	A
KLK14	19	51079638	rs112145183	G	A	GA 0.0168	D	D	1000 Genome	A
KLK14	19	51081601	rs2569490	C	T	TT 0.0108	T	D	1000 Genome	A
KLK14	19	51081646	rs61750941	C	T	CT 0.0124	T	D	1000 Genome	A
KLRC3	12	10415651	rs149679250	T	A	A 0.0132	D	T	1000 Genome	A
KLRC3	12	10415654	rs115905385	A	T	T 0.0132	D	T	1000 Genome	A
KLRC3	12	10415651	rs149679250	T	A	TA 0.0264	D	T	1000 Genome	A
KLRC3	12	10415654	rs115905385	A	T	AT 0.0264	D	T	1000 Genome	A
KMT2C	7	152252650	rs77652527	T	C	C 0.0128	T	D	1000 Genome	A
KMT2C	7	152358656	rs111826855	T	C	C 0.0100	D	D	1000 Genome	A
KMT2C	7	152162203	rs75191113	G	T	GT 0.0128	T	D	1000 Genome	A
KMT2C	7	152176208	rs61730545	G	A	GA 0.0144	D	D	1000 Genome	A
KMT2C	7	152177495	rs61730547	A	G	AG 0.0140	T	D	1000 Genome	A
KMT2C	7	152180042	rs13231116	G	T	GT 0.0156	T	D	1000 Genome	A
KMT2C	7	152252650	rs77652527	T	C	TC 0.0232	T	D	1000 Genome	A
KMT2C	7	152358656	rs111826855	T	C	TC 0.0200	D	D	1000 Genome	A
KPNA2	17	68042131	rs144637470	C	T	CT 0.0152	D	T	1000 Genome	A
KPNA2	17	68046523	rs13105	T	A	TA 0.0180	D	T	1000 Genome	A
KRT17	17	41622360	rs140804147	C	T	T 0.0240	D	D	1000 Genome	A
KRT17	17	41622360	rs140804147	C	T	CT 0.0407	D	D	1000 Genome	A
KRT17	17	41622957	rs115084509	G	A	GA 0.0116	D	D	1000 Genome	A
KRT17	17	41624500	rs11553458	A	T	TT 0.0140	T	D	1000 Genome	A
KRT5	12	52519884	rs11170164	C	T	T 0.0266	D	D	1000 Genome	A
KRT5	12	52515079	rs114734812	G	T	GT 0.0116	T	D	1000 Genome	A
KRT5	12	52515088	rs11549949	C	T	TT 0.0204	T	D	1000 Genome	A
KRT5	12	52515133	rs11549950	T	C	CC 0.0296	T	D	1000 Genome	A
KRT5	12	52519884	rs11170164	C	T	CT 0.0499	D	D	1000 Genome	A
KRT5	12	52520187	rs61747181	C	T	CT 0.0188	T	D	1000 Genome	A
KRT7	12	52241562	rs116303953	G	A	A 0.0186	D	T	1000 Genome	A
KRT7	12	52243090	rs7963792	C	T	T 0.0112	D	D	1000 Genome	A
KRT7	12	52248734	rs74761279	G	A	A 0.0278	T	D	1000 Genome	A
KRT7	12	52248741	rs111432010	G	A	A 0.0232	T	D	1000 Genome	A
KRT7	12	52233347	rs145797078	C	A	CA 0.0112	T	D	1000 Genome	A
KRT7	12	52241562	rs116303953	G	A	GA 0.0323	D	T	1000 Genome	A
KRT7	12	52243090	rs7963792	C	T	CT 0.0224	D	D	1000 Genome	A
KRT7	12	52248741	rs111432010	G	A	GA 0.0431	T	D	1000 Genome	A
KRTAP2-4	17	41065799	rs62619184	C	G	CG 0.0100	D	T	1000 Genome	A
LAIR1	19	54356963	rs114655022	G	A	GA 0.0128	D	T	1000 Genome	A
LAMC2	1	183215555	rs11586699	C	T	T 0.0409	D	T	1000 Genome	A
LAYN	11	111544009	rs11827718	G	A	A 0.0112	D	T	1000 Genome	A
LAYN	11	111544009	rs11827718	G	A	GA 0.0200	D	T	1000 Genome	A
LAYN	11	111549674	rs150184126	A	G	AG 0.0104	D	T	1000 Genome	A
LAYN	11	111560325	rs114394665	C	T	CT 0.0132	D	T	1000 Genome	A
LCN8	9	136756542	rs78263063	G	A	A 0.0138	D	T	1000 Genome	A
LCN8	9	136756542	rs78263063	G	A	GA 0.0276	D	T	1000 Genome	A
LDLR	19	11111624	rs11669576	G	A	AA 0.0120	T	D	1000 Genome	A
LGALS3	14	55145121	rs11125	A	T	T 0.0461	D	T	1000 Genome	A
LGALS3	14	55138184	rs201924703	C	A	CA 0.0152	D	T	1000 Genome	A
LGALS9	17	27640636	rs61736866	T	C	TC 0.0148	D	T	1000 Genome	A
LGALS9	17	27647416	rs142653327	G	A	GA 0.0116	D	T	1000 Genome	A
LILRB4	19	54667873	rs112611821	G	C	C 0.0244	D	T	1000 Genome	A
LILRB4	19	54663067	rs147307497	G	C	GC 0.0120	D	T	1000 Genome	A
LILRB4	19	54665922	rs76445142	A	G	AG 0.0156	D	T	1000 Genome	A
LILRB4	19	54667873	rs112611821	G	C	GC 0.0455	D	T	1000 Genome	A
LIPN	10	88764578	rs41284088	C	T	CT 0.0176	D	T	1000 Genome	A
LMAN2	5	177351532	rs11541336	A	G	AG 0.0108	D	T	1000 Genome	A
LMCD1	3	8549889	rs73135678	G	A	A 0.0325	D	T	1000 Genome	A
LMCD1	3	8565621	rs8363	C	T	CT 0.0136	T	D	1000 Genome	A
LMNB1	5	126825998	rs36105360	C	T	T 0.0100	D	D	1000 Genome	A
LMNB1	5	126825998	rs36105360	C	T	CT 0.0192	D	D	1000 Genome	A
LRP1	12	57184890	rs34577247	G	A	A 0.0122	T	D	1000 Genome	A
LRP1	12	57196001	rs7397167	A	C	A 0.0102	T	D	1000 Genome	A
LRP1	12	57145299	rs1800127	C	T	CT 0.0132	D	D	1000 Genome	A
LRP1	12	57184890	rs34577247	G	A	GA 0.0236	T	D	1000 Genome	A
LRP1	12	57196001	rs7397167	A	C	AC 0.0196	T	D	1000 Genome	A
LRP1	12	57209761	rs150065523	G	A	GA 0.0124	T	D	1000 Genome	A
LRP8	1	53247055	rs5174	C	T	TT 0.0407	D	D	1000 Genome	A
LRP8	1	53258321	rs5172	C	T	CT 0.0104	T	D	1000 Genome	A
LRRK2	12	40263898	rs7308720	C	G	GG 0.0132	D	T	1000 Genome	A
LRRK2	12	40305791	rs4640000	C	G	CG 0.0176	D	T	1000 Genome	A
LRRK2	12	40309145	rs72546327	C	T	CT 0.0128	D	T	1000 Genome	A
LRRK2	12	40320043	rs33949390	G	C	GC 0.0128	D	T	1000 Genome	A
LRTM1	3	54918617	rs61735203	C	T	T 0.0210	D	T	1000 Genome	A
LRTM1	3	54918617	rs61735203	C	T	CT 0.0387	D	T	1000 Genome	A
LTBR	12	6385344	rs41393248	C	T	T 0.0146	D	T	1000 Genome	A
LTBR	12	6390130	rs35681405	G	A	A 0.0256	T	D	1000 Genome	A
LTBR	12	6385344	rs41393248	C	T	CT 0.0292	D	T	1000 Genome	A
LTBR	12	6390130	rs35681405	G	A	GA 0.0479	T	D	1000 Genome	A
LYPLAL1	1	219211603	rs34201999	C	G	G 0.0184	D	T	1000 Genome	A
LYPLAL1	1	219211603	rs34201999	C	G	CG 0.0343	D	T	1000 Genome	A
LYSMD3	5	90519291	rs62375061	G	T	GT 0.0116	D	T	1000 Genome	A
MANEA	6	95606046	rs35772543	T	A	A 0.0451	D	D	1000 Genome	A
MCEE	2	71110073	rs115175255	C	T	T 0.0306	D	D	1000 Genome	A
MCEE	2	71124273	rs6748672	C	A	AA 0.0447	D	T	1000 Genome	A
MEPE	4	87846108	rs74593863	T	G	G 0.0118	D	T	1000 Genome	A
MEPE	4	87846108	rs74593863	T	G	TG 0.0228	D	T	1000 Genome	A
MGA	15	41729314	rs17677811	T	C	C 0.0130	D	T	1000 Genome	A
MGA	15	41749525	rs61757234	A	G	G 0.0373	D	T	1000 Genome	A
MGA	15	41696893	rs61736074	C	A	CA 0.0120	D	T	1000 Genome	A
MGA	15	41729314	rs17677811	T	C	TC 0.0252	D	T	1000 Genome	A
MGA	15	41736622	rs2695167	A	G	AG 0.0100	D	D	1000 Genome	A
MGAT1	5	180792838	rs61743256	C	T	T 0.0162	T	D	1000 Genome	A
MGAT1	5	180792838	rs61743256	C	T	CT 0.0300	T	D	1000 Genome	A
MICA	6	31411087	rs41558312	A	G	G 0.0317	D	T	1000 Genome	A
MICA	6	31411155	rs41556715	G	A	A 0.0142	D	T	1000 Genome	A
MICA	6	31412153	rs41554616	C	G	G 0.0158	D	T	1000 Genome	A
MICA	6	31410558	rs9380254	G	C	CC 0.0136	D	T	1000 Genome	A
MICA	6	31411155	rs41556715	G	A	GA 0.0268	D	T	1000 Genome	A
MICA	6	31411357	rs1131897	C	G	GG 0.0276	D	T	1000 Genome	A
MICA	6	31412153	rs41554616	C	G	CG 0.0284	D	T	1000 Genome	A
MICB	6	31507043	rs41293883	C	T	T 0.0487	D	T	1000 Genome	A
MICB	6	31509904	rs1065076	A	G	AA 0.0427	D	T	1000 Genome	A
MMP10	11	102780582	rs17435959	G	C	CC 0.0136	D	T	1000 Genome	A
MMP17	12	131851047	rs11835665	G	A	AA 0.0264	D	T	1000 Genome	A
MMP7	11	102527598	rs17884789	C	T	T 0.0218	D	T	1000 Genome	A
MMP7	11	102527598	rs17884789	C	T	CT 0.0411	D	T	1000 Genome	A
MMRN2	10	86943015	rs200124789	C	T	T 0.0152	D	T	1000 Genome	A
MMRN2	10	86943015	rs200124789	C	T	CT 0.0272	D	T	1000 Genome	A
MNX1	7	157009006	rs78596384	G	T	T 0.0481	T	D	1000 Genome	A
MPDZ	9	13190163	rs4740548	T	A	A 0.0312	D	T	1000 Genome	A
MPDZ	9	13190164	rs4741289	C	T	T 0.0310	D	T	1000 Genome	A
MPDZ	9	13186293	rs73647114	G	C	GC 0.0116	D	T	1000 Genome	A
MPP7	10	28120369	rs145570841	C	T	T 0.0170	D	T	1000 Genome	A
MPP7	10	28120369	rs145570841	C	T	CT 0.0260	D	T	1000 Genome	A
MRAP	21	32311711	rs79126334	C	G	G 0.0158	D	D	1000 Genome	A
MRAP	21	32311866	rs114530014	C	T	T 0.0156	D	D	1000 Genome	A
MRAP	21	32306681	rs75858661	G	A	GA 0.0156	D	D	1000 Genome	A
MRAP	21	32311711	rs79126334	C	G	CG 0.0308	D	D	1000 Genome	A
MRAP	21	32311866	rs114530014	C	T	CT 0.0272	D	D	1000 Genome	A
MRAP	21	32314601	rs115917390	G	T	GT 0.0140	T	D	1000 Genome	A
MRVI1	11	10626448	rs35468145	G	A	A 0.0250	D	T	1000 Genome	A
MRVI1	11	10609762	rs116772600	G	T	GT 0.0120	D	T	1000 Genome	A
MRVI1	11	10626448	rs35468145	G	A	GA 0.0483	D	T	1000 Genome	A
MSR1	8	16120603	rs138987923	G	A	A 0.0110	T	D	1000 Genome	A
MSR1	8	16120603	rs138987923	G	A	GA 0.0220	T	D	1000 Genome	A
MSR1	8	16155139	rs2229388	G	C	CC 0.0407	D	D	1000 Genome	A
MSR1	8	16168568	rs72552387	C	A	CA 0.0152	D	D	1000 Genome	A
MSR1	8	16186177	rs76917531	G	C	CC 0.0359	D	D	1000 Genome	A
MST1R	3	49899175	rs2230592	T	C	C 0.0327	D	T	1000 Genome	A
MTPAP	10	30349161	rs114438816	C	A	A 0.0288	D	T	1000 Genome	A
MYO6	6	75855180	rs61732664	T	C	C 0.0138	T	D	1000 Genome	A
MYO6	6	75894825	rs9447572	A	G	G 0.0212	T	D	1000 Genome	A
MYO6	6	75855180	rs61732664	T	C	TC 0.0260	T	D	1000 Genome	A
MYO6	6	75894825	rs9447572	A	G	AG 0.0391	T	D	1000 Genome	A
MYO6	6	75914821	rs41269323	G	A	GA 0.0112	D	D	1000 Genome	A
MYOM2	8	2069280	rs34823600	C	T	T 0.0132	D	T	1000 Genome	A
MYOM2	8	2050864	rs35578989	C	A	CA 0.0164	D	T	1000 Genome	A
MYOM2	8	2057695	rs77888349	C	T	CT 0.0120	D	T	1000 Genome	A
MYOM2	8	2069280	rs34823600	C	T	CT 0.0264	D	T	1000 Genome	A
MYOM2	8	2072462	rs34842328	C	T	CT 0.0100	D	T	1000 Genome	A
MYOM2	8	2098870	rs2294066	C	T	TT 0.0319	D	T	1000 Genome	A
MZF1	19	58562955	rs2229255	C	G	CG 0.0172	D	T	1000 Genome	A
NBR1	17	43191443	rs115552058	G	A	A 0.0158	D	T	1000 Genome	A
NBR1	17	43191443	rs115552058	G	A	GA 0.0300	D	T	1000 Genome	A
NCR2	6	41350686	rs2273961	T	A	AA 0.0288	D	T	1000 Genome	A
NEFH	22	29489027	rs59371099	G	A	A 0.0294	D	D	1000 Genome	A
NEFH	22	29489363	rs6006164	C	T	T 0.0100	D	D	1000 Genome	A
NEFH	22	29489423	rs6006165	C	T	T 0.0100	T	D	1000 Genome	A
NEFH	22	29489363	rs6006164	C	T	CT 0.0192	D	D	1000 Genome	A
NEFH	22	29489423	rs6006165	C	T	CT 0.0192	T	D	1000 Genome	A
NEFH	22	29489484	rs5763269	C	T	TT 0.0268	D	D	1000 Genome	A
NEFH	22	29490054	rs165602	A	C	CC 0.0184	D	D	1000 Genome	A
NELL1	11	21229352	rs114638511	G	A	GA 0.0100	T	D	1000 Genome	A
NEO1	15	73283089	rs118087147	C	T	T 0.0118	D	T	1000 Genome	A
NEO1	15	73283089	rs118087147	C	T	CT 0.0228	D	T	1000 Genome	A
NEURL4	17	7321200	rs145900596	T	A	TA 0.0128	D	T	1000 Genome	A
NEURL4	17	7327526	rs11655578	G	T	TT 0.0280	D	T	1000 Genome	A
NHEJ1	2	219077304	rs35270667	T	A	TA 0.0148	D	T	1000 Genome	A
NID1	1	236013545	rs35714220	C	T	T 0.0130	T	D	1000 Genome	A
NID1	1	236042041	rs34406281	C	T	T 0.0216	T	D	1000 Genome	A
NID1	1	236042140	rs16833183	C	T	T 0.0232	T	D	1000 Genome	A
NID1	1	236064988	rs2071529	C	A	A 0.0196	D	T	1000 Genome	A
NID1	1	235977934	rs6662744	G	A	GA 0.0116	D	D	1000 Genome	A
NID1	1	236013545	rs35714220	C	T	CT 0.0252	T	D	1000 Genome	A
NID1	1	236017198	rs140374909	C	T	CT 0.0144	T	D	1000 Genome	A
NID1	1	236042041	rs34406281	C	T	CT 0.0399	T	D	1000 Genome	A
NID1	1	236042140	rs16833183	C	T	CT 0.0439	T	D	1000 Genome	A
NID1	1	236064988	rs2071529	C	A	CA 0.0319	D	T	1000 Genome	A
NPC2	14	74480634	rs61738594	G	A	A 0.0110	D	D	1000 Genome	A
NPC2	14	74480634	rs61738594	G	A	GA 0.0220	D	D	1000 Genome	A
NQO1	16	69714966	rs1131341	G	A	A 0.0214	D	T	1000 Genome	A
NQO1	16	69715025	rs11555215	C	G	G 0.0136	D	T	1000 Genome	A
NQO1	16	69714966	rs1131341	G	A	GA 0.0387	D	T	1000 Genome	A
NQO1	16	69715025	rs11555215	C	G	CG 0.0256	D	T	1000 Genome	A
NRP1	10	33213429	rs117525057	G	A	GA 0.0152	D	D	1000 Genome	A
NRP1	10	33256330	rs113722704	C	T	CT 0.0148	T	D	1000 Genome	A
NT5C	17	75131253	rs11541956	G	A	GA 0.0152	D	T	1000 Genome	A
NTRK1	1	156879126	rs6336	C	T	T 0.0244	D	D	1000 Genome	A
NTRK1	1	156879154	rs6339	G	T	T 0.0230	D	D	1000 Genome	A
NTRK1	1	156879126	rs6336	C	T	CT 0.0431	D	D	1000 Genome	A
NTRK1	1	156879154	rs6339	G	T	GT 0.0435	D	D	1000 Genome	A
OMD	9	92417307	rs115116400	C	G	CG 0.0164	D	D	1000 Genome	A
OPALIN	10	96355262	rs41306852	G	A	GA 0.0108	D	.	1000 Genome	A
OSM	22	30266774	rs5763919	G	A	A 0.0102	D	T	1000 Genome	A
OSM	22	30266774	rs5763919	G	A	GA 0.0196	D	T	1000 Genome	A
PAFAH1B2	11	117171739	rs78428934	A	T	T 0.0188	D	.	1000 Genome	A
PAFAH1B2	11	117171739	rs78428934	A	T	AT 0.0359	D	.	1000 Genome	A
PAM	5	103003107	rs35658696	A	G	G 0.0134	D	D	1000 Genome	A
PAM	5	103003107	rs35658696	A	G	AG 0.0268	D	D	1000 Genome	A
PAPPA2	1	176791432	rs34602579	C	G	G 0.0102	D	T	1000 Genome	A
PAPPA2	1	176791432	rs34602579	C	G	CG 0.0188	D	T	1000 Genome	A
PC	11	66850898	rs145400751	G	A	GA 0.0108	T	D	1000 Genome	A
PCDHA7	5	140834646	rs17844305	C	G	G 0.0300	D	T	1000 Genome	A
PCDHA7	5	140836371	rs6880234	C	G	G 0.0172	D	T	1000 Genome	A
PCDHA7	5	140836371	rs6880234	C	G	CG 0.0327	D	T	1000 Genome	A
PDILT	16	20362484	rs11648131	C	T	T 0.0260	D	T	1000 Genome	A
PDILT	16	20362484	rs11648131	C	T	CT 0.0463	D	T	1000 Genome	A
PEAR1	1	156905362	rs192672356	C	T	CT 0.0168	T	D	1000 Genome	A
PEAR1	1	156907990	rs145275734	G	T	GT 0.0108	D	T	1000 Genome	A
PEAR1	1	156908681	rs77795865	C	T	CT 0.0128	D	T	1000 Genome	A
PEAR1	1	156913423	rs822442	C	A	AA 0.0459	T	D	1000 Genome	A
PEAR1	1	156913755	rs78770410	A	G	AG 0.0176	T	D	1000 Genome	A
PIGR	1	206934461	rs7542760	G	A	AA 0.0172	D	T	1000 Genome	A
PLAU	10	73911598	rs2227580	G	T	GT 0.0148	T	D	1000 Genome	A
PLAUR	19	43648948	rs4760	A	G	GG 0.0120	D	T	1000 Genome	A
PLG	6	160706526	rs4252070	G	A	A 0.0124	T	D	1000 Genome	A
PLG	6	160706526	rs4252070	G	A	GA 0.0240	T	D	1000 Genome	A
PLG	6	160731787	rs4252128	C	T	CT 0.0172	D	T	1000 Genome	A
PLOD3	7	101210630	rs75592752	G	C	C 0.0236	D	D	1000 Genome	A
PLOD3	7	101210630	rs75592752	G	C	GC 0.0391	D	D	1000 Genome	A
PNKP	19	49861464	rs3739206	A	C	C 0.0120	D	T	1000 Genome	A
PNKP	19	49864229	rs3739186	A	T	T 0.0122	D	T	1000 Genome	A
PNKP	19	49861464	rs3739206	A	C	AC 0.0232	D	T	1000 Genome	A
PNKP	19	49864229	rs3739186	A	T	AT 0.0220	D	T	1000 Genome	A
POLI	18	54293839	rs3218786	T	C	C 0.0108	D	T	1000 Genome	A
POLI	18	54293839	rs3218786	T	C	TC 0.0208	D	T	1000 Genome	A
POLI	18	54294201	rs142279753	G	C	GC 0.0184	D	T	1000 Genome	A
POMGNT2	3	43080047	rs34083889	C	A	A 0.0162	D	T	1000 Genome	A
POMGNT2	3	43080047	rs34083889	C	A	CA 0.0315	D	T	1000 Genome	A
POMGNT2	3	43080048	rs147175064	G	A	GA 0.0148	D	T	1000 Genome	A
PPM1A	14	60245872	rs201908822	G	C	GC 0.0100	D	T	1000 Genome	A
PRDX4	X	23671600	rs144393327	G	A	GA 0.0173	D	T	1000 Genome	A
PRIM1	12	56752285	rs2277339	T	G	GG 0.0268	D	T	1000 Genome	A
PRKAG1	12	49005349	rs1126930	G	C	GC 0.0144	T	D	1000 Genome	A
PRKG1	10	52062541	rs34997494	A	G	G 0.0321	T	D	1000 Genome	A
PRNP	20	4699732	rs16990018	A	G	G 0.0182	T	D	1000 Genome	A
PRNP	20	4699875	rs1800014	G	A	A 0.0162	D	D	1000 Genome	A
PRNP	20	4699732	rs16990018	A	G	AG 0.0308	T	D	1000 Genome	A
PRNP	20	4699875	rs1800014	G	A	GA 0.0300	D	D	1000 Genome	A
PROK1	1	110454030	rs62623571	C	T	T 0.0236	D	D	1000 Genome	A
PROK1	1	110454030	rs62623571	C	T	CT 0.0415	D	D	1000 Genome	A
PRSS27	16	2712636	rs61734617	A	G	G 0.0479	T	D	1000 Genome	A
PRSS27	16	2712631	rs143346488	C	T	CT 0.0124	T	D	1000 Genome	A
PRSS27	16	2714112	rs79753897	G	A	GA 0.0156	T	D	1000 Genome	A
PRSS27	16	2714256	rs149148435	C	T	CT 0.0160	T	D	1000 Genome	A
PRSS27	16	2720156	rs111761656	C	A	CA 0.0192	T	D	1000 Genome	A
PSG4	19	43195126	rs2355442	A	G	AG 0.0168	D	T	1000 Genome	A
PSG6	19	42910844	rs143485228	G	A	GA 0.0112	D	T	1000 Genome	A
PSG9	19	43258277	rs188210101	C	T	CT 0.0104	D	T	1000 Genome	A
PSPN	19	6375774	rs115367297	C	T	CT 0.0116	T	D	1000 Genome	A
PTPRS	19	5223007	rs61729778	G	A	A 0.0168	D	T	1000 Genome	A
PTPRS	19	5223007	rs61729778	G	A	GA 0.0319	D	T	1000 Genome	A
PTX3	3	157437858	rs112277608	C	T	CT 0.0144	D	T	1000 Genome	A
PTX3	3	157442912	rs138818541	G	A	GA 0.0104	D	T	1000 Genome	A
QPCT	2	37352828	rs2255991	C	T	TT 0.0367	D	T	1000 Genome	A
QRFP	9	130893636	rs12340616	A	T	T 0.0114	D	T	1000 Genome	A
QRFP	9	130893636	rs12340616	A	T	AT 0.0220	D	T	1000 Genome	A
RAD1	5	34908772	rs1805327	T	C	C 0.0453	D	T	1000 Genome	A
RBM19	12	113920616	rs79199911	G	A	A 0.0170	D	T	1000 Genome	A
RBM19	12	113844691	rs2075387	C	T	TT 0.0499	D	T	1000 Genome	A
RBM19	12	113920616	rs79199911	G	A	GA 0.0339	D	T	1000 Genome	A
RBM19	12	113940030	rs2290788	A	G	GG 0.0467	D	T	1000 Genome	A
RELL1	4	37686239	rs7696137	A	G	G 0.0180	D	T	1000 Genome	A
RELL1	4	37686239	rs7696137	A	G	AG 0.0351	D	T	1000 Genome	A
REPIN1	7	150371917	rs200191877	C	G	CG 0.0156	D	T	1000 Genome	A
RNASE4	14	20699417	rs3748338	A	T	TT 0.0216	D	T	1000 Genome	A
ROBO1	3	78635874	rs35456279	C	T	T 0.0292	D	T	1000 Genome	A
ROBO3	11	124873388	rs139930558	C	T	CT 0.0120	D	T	1000 Genome	A
RPN1	3	128637823	rs115466774	G	C	GC 0.0148	D	.	1000 Genome	A
S100A6	1	153534700	rs2228293	C	T	CT 0.0148	D	T	1000 Genome	A
SARS2	19	38926258	rs144760517	G	A	GA 0.0104	D	T	1000 Genome	A
SCIN	7	12652625	rs34535978	C	G	CG 0.0144	D	T	1000 Genome	A
SDF2L1	22	21643930	rs61739341	G	A	GA 0.0132	T	D	1000 Genome	A
SECTM1	17	82322180	rs145723287	G	A	A 0.0138	D	.	1000 Genome	A
SECTM1	17	82322180	rs145723287	G	A	GA 0.0268	D	.	1000 Genome	A
SEMA3A	7	84005396	rs147436181	C	T	CT 0.0148	D	T	1000 Genome	A
SEMG1	20	45207596	rs61729393	T	A	A 0.0126	D	T	1000 Genome	A
SEMG1	20	45207596	rs61729393	T	A	TA 0.0236	D	T	1000 Genome	A
SEMG1	20	45207620	rs2233884	A	G	AG 0.0152	D	T	1000 Genome	A
SERPINA7	X	106035377	rs2234036	C	T	T 0.0109	T	D	1000 Genome	A
SERPINA7	X	106036488	rs1050086	C	T	T 0.0360	T	D	1000 Genome	A
SERPINA7	X	106033693	rs149192322	T	A	TA 0.0134	D	D	1000 Genome	A
SERPINA7	X	106034370	rs1804495	C	A	AA 0.0433	D	D	1000 Genome	A
SERPINA7	X	106035377	rs2234036	C	T	CT 0.0189	T	D	1000 Genome	A
SERPINA7	X	106037037	rs61737031	C	A	CA 0.0110	T	D	1000 Genome	A
SERPIND1	22	20779331	rs5905	G	A	A 0.0140	T	D	1000 Genome	A
SERPIND1	22	20779331	rs5905	G	A	GA 0.0272	T	D	1000 Genome	A
SERPIND1	22	20779572	rs34324685	G	A	GA 0.0148	D	D	1000 Genome	A
SERPIND1	22	20779779	rs116401176	T	C	TC 0.0184	T	D	1000 Genome	A
SERPINE1	7	101128442	rs6090	G	A	A 0.0451	T	D	1000 Genome	A
SERPINF1	17	1771880	rs62640873	A	G	AG 0.0116	T	D	1000 Genome	A
SHH	7	155803420	rs104894047	C	T	CT 0.0112	T	D	1000 Genome	A
SIGIRR	11	408174	rs117739035	G	T	T 0.0162	D	T	1000 Genome	A
SIGIRR	11	408174	rs117739035	G	T	GT 0.0323	D	T	1000 Genome	A
SIGLEC1	20	3701479	rs34924243	C	T	T 0.0274	D	T	1000 Genome	A
SIGLEC1	20	3706029	rs35953127	C	G	G 0.0423	T	D	1000 Genome	A
SIGLEC1	20	3698102	rs73583079	C	A	CA 0.0128	D	T	1000 Genome	A
SIGLEC1	20	3706029	rs35953127	C	G	GG 0.0100	T	D	1000 Genome	A
SIGLEC14	19	51643616	rs138832022	C	T	CT 0.0144	D	T	1000 Genome	A
SIRPB1	20	1570918	rs41297640	T	C	TC 0.0124	D	T	1000 Genome	A
SIRPB1	20	1571784	rs2253427	T	C	TT 0.0379	D	T	1000 Genome	A
SIRPB1	20	1571945	rs61733947	G	A	GA 0.0168	D	T	1000 Genome	A
SMPDL3A	6	122806341	rs61745223	G	A	A 0.0180	T	D	1000 Genome	A
SMPDL3A	6	122801319	rs28385609	C	T	TT 0.0148	D	D	1000 Genome	A
SMPDL3A	6	122803797	rs62623431	A	C	AC 0.0112	T	D	1000 Genome	A
SMPDL3A	6	122806341	rs61745223	G	A	GA 0.0327	T	D	1000 Genome	A
SMYD2	1	214318946	rs61755311	T	G	TG 0.0168	D	T	1000 Genome	A
SORBS3	8	22564314	rs75023966	T	C	C 0.0122	D	T	1000 Genome	A
SORBS3	8	22564469	rs3758036	C	T	T 0.0124	D	T	1000 Genome	A
SORBS3	8	22564314	rs75023966	T	C	TC 0.0244	D	T	1000 Genome	A
SORBS3	8	22564469	rs3758036	C	T	CT 0.0240	D	T	1000 Genome	A
SPATA9	5	95675485	rs55796768	A	G	AG 0.0184	D	T	1000 Genome	A
SPINT2	19	38291845	rs11548457	G	C	C 0.0178	D	T	1000 Genome	A
SPINT2	19	38291845	rs11548457	G	C	GC 0.0355	D	T	1000 Genome	A
SPOCK2	10	72063097	rs2306322	C	T	CT 0.0124	D	T	1000 Genome	A
SPOCK2	10	72088294	rs150218613	G	A	GA 0.0108	D	T	1000 Genome	A
SPP1	4	87982660	rs575565830	A	C	C 0.0116	D	T	1000 Genome	A
SPP1	4	87982664	rs78051010	A	C	C 0.0116	D	T	1000 Genome	A
SPP1	4	87982622	rs7435825	G	A	AA 0.0104	D	T	1000 Genome	A
SPP1	4	87982660	rs575565830	A	C	AC 0.0224	D	T	1000 Genome	A
SPP1	4	87982664	rs78051010	A	C	AC 0.0224	D	T	1000 Genome	A
SPTLC2	14	77576892	rs75565823	C	G	CG 0.0100	T	D	1000 Genome	A
STAB1	3	52517957	rs77803411	C	T	T 0.0214	T	D	1000 Genome	A
STAB1	3	52520288	rs7630214	G	C	G 0.0168	T	D	1000 Genome	A
STAB1	3	52501750	rs138055453	C	T	CT 0.0156	T	D	1000 Genome	A
STAB1	3	52510454	rs9835659	A	G	AG 0.0172	T	D	1000 Genome	A
STAB1	3	52512856	rs150311081	G	A	GA 0.0156	D	D	1000 Genome	A
STAB1	3	52517957	rs77803411	C	T	CT 0.0371	T	D	1000 Genome	A
STAB1	3	52519524	rs79269239	C	G	CG 0.0112	D	D	1000 Genome	A
STAB1	3	52520288	rs7630214	G	C	GC 0.0327	T	D	1000 Genome	A
STX2	12	130808702	rs76596600	T	C	C 0.0104	D	T	1000 Genome	A
STX2	12	130808702	rs76596600	T	C	TC 0.0200	D	T	1000 Genome	A
STX2	12	130821733	rs7301926	T	C	CC 0.0104	D	T	1000 Genome	A
STX2	12	130827204	rs137928907	A	C	AC 0.0100	D	T	1000 Genome	A
SULT2A1	19	47883735	rs11569681	C	G	G 0.0240	T	D	1000 Genome	A
SULT2A1	19	47883735	rs11569681	C	G	CG 0.0431	T	D	1000 Genome	A
TACSTD2	1	58576716	rs1062964	C	G	G 0.0377	D	T	1000 Genome	A
TBX22	X	80025703	rs34244923	G	A	A 0.0209	D	D	1000 Genome	A
TBX22	X	80025703	rs34244923	G	A	GA 0.0409	D	D	1000 Genome	A
TENM4	11	78658435	rs76975254	C	T	T 0.0122	T	D	1000 Genome	A
TENM4	11	78854269	rs17137261	C	G	G 0.0310	D	T	1000 Genome	A
TENM4	11	78658368	rs78572681	T	C	TC 0.0108	T	D	1000 Genome	A
TENM4	11	78658435	rs76975254	C	T	CT 0.0220	T	D	1000 Genome	A
TENM4	11	78658455	rs114100394	C	T	CT 0.0152	T	D	1000 Genome	A
TENM4	11	78658639	rs61745704	C	A	CA 0.0184	D	D	1000 Genome	A
TENM4	11	78863083	rs111280970	C	G	CG 0.0168	T	D	1000 Genome	A
TENM4	11	78903332	rs182302962	C	T	CT 0.0136	T	D	1000 Genome	A
TENM4	11	79069904	rs58537389	C	T	CT 0.0100	D	T	1000 Genome	A
TG	8	132901413	rs61746583	A	G	G 0.0172	D	T	1000 Genome	A
TG	8	132941495	rs61744749	A	C	C 0.0280	D	T	1000 Genome	A
TG	8	132948912	rs73710715	A	G	G 0.0110	D	T	1000 Genome	A
TG	8	133096215	rs61730222	G	C	C 0.0180	D	T	1000 Genome	A
TG	8	133113427	rs12114109	T	A	A 0.0343	D	T	1000 Genome	A
TG	8	132871426	rs114322847	C	T	CT 0.0116	T	D	1000 Genome	A
TG	8	132898216	rs11992497	C	A	CA 0.0164	D	T	1000 Genome	A
TG	8	132901413	rs61746583	A	G	AG 0.0319	D	T	1000 Genome	A
TG	8	132941528	rs16904791	C	A	CA 0.0144	D	T	1000 Genome	A
TG	8	132948912	rs73710715	A	G	AG 0.0196	D	T	1000 Genome	A
TG	8	133096215	rs61730222	G	C	GC 0.0343	D	T	1000 Genome	A
TG	8	133113489	rs2979042	T	A	TA 0.0144	D	T	1000 Genome	A
THBS4	5	80076898	rs2229396	G	A	A 0.0178	T	D	1000 Genome	A
THBS4	5	80078171	rs2229398	G	A	A 0.0158	T	D	1000 Genome	A
THBS4	5	80059736	rs114966377	C	T	CT 0.0100	T	D	1000 Genome	A
THBS4	5	80065442	rs1866389	G	C	CC 0.0232	D	D	1000 Genome	A
THBS4	5	80076898	rs2229396	G	A	GA 0.0339	T	D	1000 Genome	A
THBS4	5	80078171	rs2229398	G	A	GA 0.0236	T	D	1000 Genome	A
TJP1	15	29716773	rs2291166	T	G	G 0.0365	D	T	1000 Genome	A
TLR2	4	153704799	rs5743704	C	A	CA 0.0184	D	T	1000 Genome	A
TLR2	4	153705165	rs5743708	G	A	GA 0.0128	D	T	1000 Genome	A
TMEM119	12	108592241	rs73404789	G	A	A 0.0262	D	T	1000 Genome	A
TMEM119	12	108592241	rs73404789	G	A	GA 0.0459	D	T	1000 Genome	A
TMUB2	17	44190581	rs9895154	G	A	A 0.0459	D	T	1000 Genome	A
TNFAIP3	6	137874854	rs146534657	A	G	G 0.0130	D	T	1000 Genome	A
TNFAIP3	6	137874854	rs146534657	A	G	AG 0.0252	D	T	1000 Genome	A
TNFAIP3	6	137874923	rs5029941	C	T	CT 0.0120	D	T	1000 Genome	A
TNFRSF10D	8	23137974	rs112449156	G	T	T 0.0122	T	D	1000 Genome	A
TNFRSF10D	8	23137998	rs34622674	T	G	G 0.0238	T	D	1000 Genome	A
TNFRSF10D	8	23138194	rs61752042	C	T	T 0.0114	T	D	1000 Genome	A
TNFRSF10D	8	23144496	rs61756241	A	G	G 0.0174	T	D	1000 Genome	A
TNFRSF10D	8	23144517	rs61755337	T	C	C 0.0174	T	D	1000 Genome	A
TNFRSF10D	8	23144518	rs61755336	G	T	T 0.0174	T	D	1000 Genome	A
TNFRSF10D	8	23144577	rs55636833	C	T	T 0.0148	T	D	1000 Genome	A
TNFRSF10D	8	23144611	rs78332874	G	A	A 0.0126	T	D	1000 Genome	A
TNFRSF10D	8	23145716	rs150861587	A	T	T 0.0120	T	D	1000 Genome	A
TNFRSF10D	8	23145719	rs139303833	C	A	A 0.0120	T	D	1000 Genome	A
TNFRSF10D	8	23145779	rs35213435	G	T	T 0.0128	T	D	1000 Genome	A
TNFRSF10D	8	23145881	rs111569580	G	A	A 0.0154	T	D	1000 Genome	A
TNFRSF10D	8	23137974	rs112449156	G	T	GT 0.0244	T	D	1000 Genome	A
TNFRSF10D	8	23137998	rs34622674	T	G	TG 0.0427	T	D	1000 Genome	A
TNFRSF10D	8	23138194	rs61752042	C	T	CT 0.0228	T	D	1000 Genome	A
TNFRSF10D	8	23144496	rs61756241	A	G	AG 0.0339	T	D	1000 Genome	A
TNFRSF10D	8	23144517	rs61755337	T	C	TC 0.0339	T	D	1000 Genome	A
TNFRSF10D	8	23144518	rs61755336	G	T	GT 0.0339	T	D	1000 Genome	A
TNFRSF10D	8	23144532	rs116710124	G	C	GC 0.0136	D	D	1000 Genome	A
TNFRSF10D	8	23144577	rs55636833	C	T	CT 0.0288	T	D	1000 Genome	A
TNFRSF10D	8	23144611	rs78332874	G	A	GA 0.0244	T	D	1000 Genome	A
TNFRSF10D	8	23144622	rs61755335	C	T	CT 0.0108	T	D	1000 Genome	A
TNFRSF10D	8	23145716	rs150861587	A	T	AT 0.0240	T	D	1000 Genome	A
TNFRSF10D	8	23145719	rs139303833	C	A	CA 0.0240	T	D	1000 Genome	A
TNFRSF10D	8	23145779	rs35213435	G	T	GT 0.0248	T	D	1000 Genome	A
TNFRSF10D	8	23145881	rs111569580	G	A	GA 0.0276	T	D	1000 Genome	A
TNFRSF11B	8	118924739	rs140782326	C	T	CT 0.0104	D	D	1000 Genome	A
TNFRSF14	1	2559867	rs2234163	G	A	A 0.0212	T	D	1000 Genome	A
TNFRSF14	1	2559867	rs2234163	G	A	GA 0.0407	T	D	1000 Genome	A
TNFRSF14	1	2562891	rs2234167	G	A	AA 0.0172	T	D	1000 Genome	A
TNFRSF1A	12	6333835	rs4149637	G	A	A 0.0282	D	D	1000 Genome	A
TNFRSF1A	12	6333477	rs4149584	C	T	CT 0.0120	T	D	1000 Genome	A
TNFRSF4	1	1214100	rs35304565	G	A	GA 0.0104	D	T	1000 Genome	A
TNFRSF8	1	12138305	rs144498730	C	A	A 0.0128	D	T	1000 Genome	A
TNFRSF8	1	12138305	rs144498730	C	A	CA 0.0248	D	T	1000 Genome	A
TNFSF9	19	6534830	rs34989544	G	A	GA 0.0176	T	D	1000 Genome	A
TNS2	12	53059649	rs11558984	G	A	A 0.0274	T	D	1000 Genome	A
TNS2	12	53059932	rs145888788	G	A	GA 0.0100	D	D	1000 Genome	A
TNS4	17	40487344	rs33923045	G	T	T 0.0220	D	T	1000 Genome	A
TNS4	17	40487132	rs140876567	C	A	CA 0.0164	D	T	1000 Genome	A
TNS4	17	40487344	rs33923045	G	T	GT 0.0407	D	T	1000 Genome	A
TP53	17	7676230	rs1800371	G	A	GA 0.0104	T	D	1000 Genome	A
TRAT1	3	108853726	rs57744779	A	G	G 0.0210	D	T	1000 Genome	A
TRAT1	3	108853726	rs57744779	A	G	AG 0.0371	D	T	1000 Genome	A
TREML2	6	41192834	rs35521209	C	T	T 0.0174	D	T	1000 Genome	A
TREML2	6	41192834	rs35521209	C	T	CT 0.0339	D	T	1000 Genome	A
TYK2	19	10352442	rs34536443	G	C	C 0.0102	D	T	1000 Genome	A
TYK2	19	10359299	rs12720356	A	C	C 0.0282	D	T	1000 Genome	A
TYK2	19	10350910	rs55886939	T	C	TC 0.0124	D	D	1000 Genome	A
TYK2	19	10352442	rs34536443	G	C	GC 0.0204	D	T	1000 Genome	A
TYK2	19	10357771	rs34046749	G	T	GT 0.0164	D	D	1000 Genome	A
TYK2	19	10359243	rs55882956	G	A	GA 0.0160	D	T	1000 Genome	A
UPK3B	7	76515139	rs137995680	G	A	GA 0.0144	D	T	1000 Genome	A
USP8	15	50481590	rs3743044	A	G	G 0.0499	D	T	1000 Genome	A
VIT	2	36808791	rs2072526	A	G	GG 0.0479	T	D	1000 Genome	A
VWC2L	2	214575691	rs16852050	A	T	T 0.0200	D	.	1000 Genome	A
VWC2L	2	214575691	rs16852050	A	T	AT 0.0383	D	.	1000 Genome	A
WFDC10A	20	45629902	rs58353703	A	T	AT 0.0172	D	T	1000 Genome	A
WFIKKN2	17	50835960	rs140211672	G	C	GC 0.0140	T	D	1000 Genome	A
WFIKKN2	17	50839574	rs35300894	G	A	AA 0.0164	D	D	1000 Genome	A
WFIKKN2	17	50839994	rs191998613	C	T	CT 0.0100	D	T	1000 Genome	A
XRCC1	19	43553422	rs1799782	G	A	AA 0.0216	D	T	1000 Genome	A
XRCC1	19	43553616	rs2307191	G	A	GA 0.0108	D	T	1000 Genome	A
XRCC4	5	83104954	rs28383138	C	G	CG 0.0156	D	T	1000 Genome	A
YES1	18	745840	rs34580680	T	C	TC 0.0116	T	D	1000 Genome	A
ZNF18	17	11978039	rs117755721	G	A	GA 0.0120	D	T	1000 Genome	A
ZNF18	17	11991111	rs139692409	G	A	GA 0.0128	D	T	1000 Genome	A
ZNF415	19	53108549	rs61733666	T	G	G 0.0198	D	T	1000 Genome	A
ZNF415	19	53108549	rs61733666	T	G	TG 0.0371	D	T	1000 Genome	A
ZNF415	19	53109606	rs116534642	G	C	GC 0.0124	D	T	1000 Genome	A
ZNF843	16	31436564	rs116147135	G	T	T 0.0118	D	T	1000 Genome	A
ZNF843	16	31436377	rs80346735	G	T	GT 0.0104	D	T	1000 Genome	A
ZNF843	16	31436467	rs74015530	G	A	AA 0.0168	D	T	1000 Genome	A
ZNF843	16	31436564	rs116147135	G	T	GT 0.0220	D	T	1000 Genome	A
ZP4	1	237885843	rs34811980	G	A	A 0.0313	D	T	1000 Genome	A
ABCC6	16	16251599	rs2238472	C	T	TT 0.0143	T	D	CONVERGE	A
ABCC6	16	16278863	rs8058694	G	T	TT 0.0272	T	D	CONVERGE	A
ABCC6	16	16281007	rs12931472	A	G	GG 0.0255	T	D	CONVERGE	A
ABL2	1	179077415	rs28913890	G	C	GC 0.0188	D	T	CONVERGE	A
ADAMTS15	11	130319265	rs185269810	G	C	C 0.0134	D	T	CONVERGE	A
ADAMTS15	11	130319265	rs185269810	G	C	GC 0.0269	D	T	CONVERGE	A
ADAMTS15	11	130340817	rs79839754	T	G	TG 0.0116	D	T	CONVERGE	A
ADAMTS6	5	64468684	rs74464814	C	T	CT 0.0184	D	T	CONVERGE	A
ADH4	4	100064368	rs13125262	G	C	C 0.0312	D	T	CONVERGE	A
AGT	1	230845794	rs699	A	G	AA 0.0378	T	D	CONVERGE	A
ALCAM	3	105260520	rs1044243	C	T	T 0.0345	D	T	CONVERGE	A
ARHGEF1	19	42402593	rs2303797	C	T	T 0.0216	D	T	CONVERGE	A
ARHGEF1	19	42402593	rs2303797	C	T	CT 0.0400	D	T	CONVERGE	A
ARHGEF25	12	58005682	rs60586224	G	A	AA 0.0382	D	T	CONVERGE	A
ARSK	5	94939193	rs17084927	A	G	GG 0.0160	T	D	CONVERGE	A
AXIN2	17	63531768	rs139209450	G	A	A 0.0172	D	T	CONVERGE	A
AXIN2	17	63533904	rs201460658	G	A	A 0.0114	T	D	CONVERGE	A
AXIN2	17	63531768	rs139209450	G	A	GA 0.0328	D	T	CONVERGE	A
AXIN2	17	63533904	rs201460658	G	A	GA 0.0227	T	D	CONVERGE	A
BARD1	2	215595164	rs3738888	G	A	GA 0.0101	D	T	CONVERGE	A
BTC	4	75675841	rs11938093	A	T	T 0.0338	D	T	CONVERGE	A
C2	6	31903804	rs9332739	G	C	C 0.0232	T	D	CONVERGE	A
C2	6	31903804	rs9332739	G	C	GC 0.0454	T	D	CONVERGE	A
C7	5	40936541	rs2271708	T	C	C 0.0251	D	T	CONVERGE	A
C7	5	40955653	rs3792646	A	C	C 0.0176	D	D	CONVERGE	A
C7	5	40936541	rs2271708	T	C	TC 0.0471	D	T	CONVERGE	A
C7	5	40955653	rs3792646	A	C	AC 0.0336	D	D	CONVERGE	A
CASS4	20	55020999	rs77627768	C	T	T 0.0204	D	T	CONVERGE	A
CASS4	20	55020999	rs77627768	C	T	CT 0.0398	D	T	CONVERGE	A
CD27	12	6554628	rs25680	G	A	A 0.0379	T	D	CONVERGE	A
CD33	19	51728477	rs12459419	C	T	TT 0.0404	D	T	CONVERGE	A
CD4	12	6925407	rs28919570	C	T	T 0.0386	D	T	CONVERGE	A
CD48	1	160654857	rs143226582	A	G	AG 0.0146	D	T	CONVERGE	A
CDH15	16	89261471	rs149307887	G	A	A 0.0260	D	T	CONVERGE	A
CDH15	16	89261471	rs149307887	G	A	GA 0.0486	D	T	CONVERGE	A
CDHR1	10	85961608	rs151204356	C	T	T 0.0140	D	T	CONVERGE	A
CDHR1	10	85961608	rs151204356	C	T	CT 0.0268	D	T	CONVERGE	A
CEBPB	20	48807605	20:48807605	T	C	C 0.0250	D	T	CONVERGE	A
CEBPB	20	48807605	20:48807605	T	C	TC 0.0488	D	T	CONVERGE	A
CFB	6	31914024	rs4151667	T	A	A 0.0240	D	T	CONVERGE	A
CFB	6	31914024	rs4151667	T	A	TA 0.0470	D	T	CONVERGE	A
CFB	6	31914306	rs117314762	G	A	GA 0.0155	D	T	CONVERGE	A
CFB	6	31918154	rs149101394	A	G	AG 0.0159	T	D	CONVERGE	A
CHST3	10	73767859	rs3740129	G	A	AA 0.0137	T	D	CONVERGE	A
COL6A5	3	130114032	rs78983126	C	T	CT 0.0111	T	D	CONVERGE	A
COL6A5	3	130116696	rs12488457	A	C	CC 0.0214	D	T	CONVERGE	A
COL6A5	3	130125116	rs1497312	G	C	CC 0.0240	T	D	CONVERGE	A
COL6A5	3	130129322	rs35886424	G	C	CC 0.0154	T	D	CONVERGE	A
COL6A5	3	130134492	rs16827497	T	C	CC 0.0248	T	D	CONVERGE	A
COL6A5	3	130135644	rs76864445	C	A	AA 0.0146	T	D	CONVERGE	A
CRELD1	3	9979713	rs2302787	C	G	G 0.0192	D	T	CONVERGE	A
CRELD1	3	9979713	rs2302787	C	G	CG 0.0380	D	T	CONVERGE	A
CRLF2	X	1314990	rs140409545	G	A	A 0.0173	D	D	CONVERGE	A
CRLF2	X	1314990	rs140409545	G	A	GA 0.0336	D	D	CONVERGE	A
CSF2RA	X	1401646	rs142270234	C	G	G 0.0171	T	D	CONVERGE	A
CSF2RA	X	1401646	rs142270234	C	G	CG 0.0332	T	D	CONVERGE	A
CSF2RA	X	1428421	rs145245265	G	T	TT 0.0123	D	T	CONVERGE	A
CSF3R	1	36932272	rs78861150	G	T	GT 0.0146	D	T	CONVERGE	A
CTRL	16	67964203	rs1134760	T	C	CC 0.0182	.	D	CONVERGE	A
CTSB	8	11702653	rs117613666	T	G	G 0.0407	D	T	CONVERGE	A
CTSB	8	11708479	rs74996838	T	C	C 0.0108	T	D	CONVERGE	A
CTSB	8	11708479	rs74996838	T	C	TC 0.0214	T	D	CONVERGE	A
CTSC	11	88027209	rs3888798	T	C	CC 0.0108	D	D	CONVERGE	A
CUBN	10	16960683	rs140806389	T	A	A 0.0271	D	T	CONVERGE	A
CUBN	10	16961995	rs2271460	A	C	C 0.0281	D	T	CONVERGE	A
CUBN	10	17153023	rs78201384	C	T	T 0.0133	T	D	CONVERGE	A
CUBN	10	16979606	rs2356590	G	T	TT 0.0439	D	T	CONVERGE	A
CUBN	10	17153023	rs78201384	C	T	CT 0.0262	T	D	CONVERGE	A
CUBN	10	17156151	rs1801222	A	G	AA 0.0366	T	D	CONVERGE	A
CUL4B	X	119693637	rs113213082	C	T	T 0.0138	D	T	CONVERGE	A
CUL4B	X	119693637	rs113213082	C	T	CT 0.0271	D	T	CONVERGE	A
DAG1	3	49568275	rs117209107	G	A	A 0.0171	T	D	CONVERGE	A
DAG1	3	49568275	rs117209107	G	A	GA 0.0339	T	D	CONVERGE	A
DKKL1	19	49867899	rs2303757	T	G	G 0.0134	D	T	CONVERGE	A
DKKL1	19	49878082	rs141628956	C	T	T 0.0155	D	T	CONVERGE	A
DKKL1	19	49867899	rs2303757	T	G	TG 0.0262	D	T	CONVERGE	A
DKKL1	19	49878082	rs141628956	C	T	CT 0.0305	D	T	CONVERGE	A
DNAJC10	2	183605077	rs13414223	C	A	AA 0.0152	D	T	CONVERGE	A
DOCK9	13	99738554	rs117633128	G	A	GA 0.0117	D	T	CONVERGE	A
DSC3	18	28612229	rs2852003	G	T	T 0.0422	D	T	CONVERGE	A
EDAR	2	109513572	rs146567337	T	G	G 0.0203	D	D	CONVERGE	A
EDAR	2	109513601	rs3827760	A	G	A 0.0464	D	D	CONVERGE	A
EDAR	2	109545691	rs61761321	T	C	C 0.0458	T	D	CONVERGE	A
EDAR	2	109513572	rs146567337	T	G	TG 0.0401	D	D	CONVERGE	A
EHD4	15	42235316	rs11549015	C	T	T 0.0152	T	D	CONVERGE	A
EHD4	15	42235316	rs11549015	C	T	CT 0.0289	T	D	CONVERGE	A
EMILIN3	20	39990596	rs144312180	T	C	TC 0.0145	D	T	CONVERGE	A
EPHA2	1	16461581	rs55747232	G	A	A 0.0207	D	T	CONVERGE	A
EPHA2	1	16461581	rs55747232	G	A	GA 0.0407	D	T	CONVERGE	A
EPHB4	7	100417364	rs55720981	G	A	A 0.0104	T	D	CONVERGE	A
EPHB4	7	100417364	rs55720981	G	A	GA 0.0205	T	D	CONVERGE	A
ERBB3	12	56495023	rs2271188	G	A	A 0.0129	D	T	CONVERGE	A
ERBB3	12	56495023	rs2271188	G	A	GA 0.0251	D	T	CONVERGE	A
EVPL	17	74019680	rs78044548	C	T	T 0.0366	D	T	CONVERGE	A
EVPL	17	74003846	rs7342883	G	A	GA 0.0152	D	T	CONVERGE	A
EVPL	17	74003981	rs191977923	C	T	CT 0.0112	D	T	CONVERGE	A
FCN2	9	137777132	rs12684476	G	A	A 0.0205	D	T	CONVERGE	A
FCN2	9	137777132	rs12684476	G	A	GA 0.0376	D	T	CONVERGE	A
FCN2	9	137779091	rs7851696	G	T	TT 0.0335	D	T	CONVERGE	A
FGFR3	4	1806633	rs56240927	C	T	T 0.0182	T	D	CONVERGE	A
FGFR3	4	1806633	rs56240927	C	T	CT 0.0353	T	D	CONVERGE	A
FLNA	X	153593613	rs143873938	C	T	T 0.0257	D	D	CONVERGE	A
FLNA	X	153593613	rs143873938	C	T	CT 0.0495	D	D	CONVERGE	A
FRZB	2	183699584	rs7775	G	C	GC 0.0194	D	T	CONVERGE	A
GHR	5	42719092	rs6183	C	A	A 0.0117	D	T	CONVERGE	A
GHR	5	42718928	rs6182	G	T	TT 0.0126	D	T	CONVERGE	A
GHR	5	42719092	rs6183	C	A	CA 0.0230	D	T	CONVERGE	A
GZMA	5	54404053	rs2270627	G	T	T 0.0153	D	T	CONVERGE	A
GZMA	5	54404053	rs2270627	G	T	GT 0.0299	D	T	CONVERGE	A
HGD	3	120389335	rs141965690	T	A	TA 0.0126	T	D	CONVERGE	A
HHLA2	3	108081217	rs3792332	C	A	AA 0.0212	D	T	CONVERGE	A
HIF1A	14	62207557	rs11549465	C	T	T 0.0438	T	D	CONVERGE	A
HIF1A	14	62164581	rs187111747	T	C	TC 0.0128	D	T	CONVERGE	A
HNF4A	20	43042364	rs1800961	C	T	CT 0.0162	T	D	CONVERGE	A
IFNA10	9	21206951	rs145687453	G	T	GT 0.0108	D	T	CONVERGE	A
IFNGR1	6	137536455	rs1327475	G	A	AA 0.0129	D	D	CONVERGE	A
IL1RL1	2	102955474	rs34210856	C	T	T 0.0386	D	T	CONVERGE	A
IL7R	5	35876449	rs2229232	C	T	T 0.0398	D	T	CONVERGE	A
IL7R	5	35874575	rs6897932	C	T	TT 0.0243	T	D	CONVERGE	A
KCNA10	1	111061066	rs150926393	C	T	T 0.0139	D	T	CONVERGE	A
KCNA10	1	111061066	rs150926393	C	T	CT 0.0270	D	T	CONVERGE	A
KLK14	19	51584916	rs2569491	G	A	AA 0.0102	T	D	CONVERGE	A
KLK14	19	51584951	rs35287116	T	C	CC 0.0102	T	D	CONVERGE	A
KLRF1	12	9985915	rs2232548	G	T	T 0.0377	D	T	CONVERGE	A
KMT2C	7	151859683	rs74483926	G	A	AA 0.0259	T	D	CONVERGE	A
KMT2C	7	151860023	rs78004519	A	G	AG 0.0138	D	D	CONVERGE	A
KMT2C	7	151949068	rs3735156	C	G	GG 0.0110	T	D	CONVERGE	A
KRT5	12	52908872	rs11549949	C	T	T 0.0422	T	D	CONVERGE	A
KRT5	12	52908917	rs11549950	T	C	C 0.0422	T	D	CONVERGE	A
KRT7	12	52627131	rs145797078	C	A	CA 0.0126	T	D	CONVERGE	A
KRT7	12	52642518	rs74761279	G	A	AA 0.0113	T	D	CONVERGE	A
KYNU	2	143715265	rs2304705	G	A	GA 0.0117	D	T	CONVERGE	A
LILRB4	19	55179120	rs147216101	C	T	T 0.0104	D	T	CONVERGE	A
LILRB4	19	55179120	rs147216101	C	T	CT 0.0209	D	T	CONVERGE	A
LMOD1	1	201869257	rs2820312	G	A	AA 0.0132	T	D	CONVERGE	A
LRIT2	10	85984444	rs11200927	T	G	GG 0.0222	D	T	CONVERGE	A
LRP1	12	57602881	rs79435985	A	T	T 0.0116	D	D	CONVERGE	A
LRP1	12	57602881	rs79435985	A	T	AT 0.0231	D	D	CONVERGE	A
LRP8	1	53712727	rs5174	C	T	T 0.0144	D	D	CONVERGE	A
LRP8	1	53712727	rs5174	C	T	CT 0.0284	D	D	CONVERGE	A
MCEE	2	71351403	rs6748672	C	A	AA 0.0183	D	T	CONVERGE	A
MGA	15	41961113	rs138712718	T	G	TG 0.0156	D	D	CONVERGE	A
MGA	15	42032383	rs17677991	C	G	GG 0.0353	D	D	CONVERGE	A
MGAT1	5	180219304	rs7726005	C	T	TT 0.0474	T	D	CONVERGE	A
MICA	6	31378864	rs148069425	A	G	G 0.0139	D	T	CONVERGE	A
MICA	6	31379134	rs115257533	C	G	G 0.0292	D	T	CONVERGE	A
MICA	6	31379930	rs183291469	C	G	G 0.0475	D	T	CONVERGE	A
MICA	6	31378864	rs148069425	A	G	AG 0.0258	D	T	CONVERGE	A
MICA	6	31380194	rs114717570	T	C	CC 0.0391	D	T	CONVERGE	A
MICA	6	31380198	rs115720194	C	T	TT 0.0404	D	T	CONVERGE	A
MICB	6	31474820	rs41293883	C	T	T 0.0380	D	T	CONVERGE	A
MICB	6	31477681	rs1065076	A	G	AA 0.0174	D	T	CONVERGE	A
MMP10	11	102651313	rs17435959	G	C	C 0.0441	D	T	CONVERGE	A
MNX1	7	156802998	7:156802998	T	G	G 0.0114	D	D	CONVERGE	A
MNX1	7	156801700	rs78596384	G	T	TT 0.0247	T	D	CONVERGE	A
MNX1	7	156802998	7:156802998	T	G	TG 0.0227	D	D	CONVERGE	A
MST1R	3	49924940	rs1062633	T	C	CC 0.0284	T	D	CONVERGE	A
MYOM2	8	2017399	rs34823600	C	T	T 0.0248	D	T	CONVERGE	A
MYOM2	8	2024280	rs117189614	G	A	A 0.0135	D	T	CONVERGE	A
MYOM2	8	2017399	rs34823600	C	T	CT 0.0487	D	T	CONVERGE	A
MYOM2	8	2024280	rs117189614	G	A	GA 0.0256	D	T	CONVERGE	A
NCL	2	232326517	rs117088491	T	G	G 0.0136	D	T	CONVERGE	A
NCL	2	232326517	rs117088491	T	G	TG 0.0271	D	T	CONVERGE	A
NEFH	22	29886043	rs165602	A	C	C 0.0414	D	D	CONVERGE	A
NEO1	15	73575430	rs118087147	C	T	T 0.0388	D	T	CONVERGE	A
NEURL4	17	7230845	rs11655578	G	T	TT 0.0194	D	T	CONVERGE	A
NGFR	17	47587819	rs2072446	C	T	TT 0.0148	T	D	CONVERGE	A
NGRN	15	90814664	rs11073922	C	T	T 0.0113	D	T	CONVERGE	A
NGRN	15	90814664	rs11073922	C	T	CT 0.0215	D	T	CONVERGE	A
NID1	1	236176845	rs35714220	C	T	T 0.0117	T	D	CONVERGE	A
NID1	1	236228288	rs2071529	C	A	A 0.0213	D	T	CONVERGE	A
NID1	1	236176845	rs35714220	C	T	CT 0.0233	T	D	CONVERGE	A
NID1	1	236228288	rs2071529	C	A	CA 0.0399	D	T	CONVERGE	A
NQO1	16	69748869	rs1131341	G	A	A 0.0196	D	T	CONVERGE	A
NQO1	16	69748869	rs1131341	G	A	GA 0.0383	D	T	CONVERGE	A
OSM	22	30662763	rs5763919	G	A	A 0.0489	D	T	CONVERGE	A
PC	11	66620033	rs199969388	T	C	TC 0.0128	D	D	CONVERGE	A
PCDHA7	5	140214231	rs17844305	C	G	G 0.0123	D	T	CONVERGE	A
PCDHA7	5	140214231	rs17844305	C	G	CG 0.0245	D	T	CONVERGE	A
PDCD1LG2	9	5557708	rs7854413	T	C	CC 0.0102	D	T	CONVERGE	A
PLG	6	161159625	rs121918027	G	A	GA 0.0187	T	D	CONVERGE	A
PLOD3	7	100853911	rs75592752	G	C	CC 0.0125	D	D	CONVERGE	A
PMS2	7	6013049	rs1802683	C	G	CG 0.0136	T	D	CONVERGE	A
PNKP	19	50364721	rs3739206	A	C	C 0.0245	D	T	CONVERGE	A
PNKP	19	50364721	rs3739206	A	C	AC 0.0421	D	T	CONVERGE	A
PPM1A	14	60712590	14:60712590	G	C	GC 0.0119	D	T	CONVERGE	A
PRIM1	12	57146069	rs2277339	T	G	GG 0.0338	D	T	CONVERGE	A
PRKG1	10	53822301	rs34997494	A	G	G 0.0178	T	D	CONVERGE	A
PRKG1	10	53822301	rs34997494	A	G	AG 0.0349	T	D	CONVERGE	A
PRKG1	10	54040670	rs139646798	C	T	CT 0.0124	D	T	CONVERGE	A
PRNP	20	4680251	rs1799990	A	G	G 0.0232	D	D	CONVERGE	A
PRNP	20	4680521	rs1800014	G	A	A 0.0383	D	D	CONVERGE	A
PRNP	20	4680251	rs1799990	A	G	AG 0.0459	D	D	CONVERGE	A
PSG4	19	43699278	rs2355442	A	G	G 0.0131	D	T	CONVERGE	A
PSG4	19	43699278	rs2355442	A	G	AG 0.0257	D	T	CONVERGE	A
RAD1	5	34908877	rs1805327	T	C	C 0.0401	D	T	CONVERGE	A
RAET1E	6	150209717	rs2342767	C	G	CC 0.0108	D	T	CONVERGE	A
RBM19	12	114282496	rs2075387	C	T	TT 0.0242	D	T	CONVERGE	A
RBM19	12	114377835	rs2290788	A	G	GG 0.0292	D	T	CONVERGE	A
REPIN1	7	150066900	rs10237887	A	G	G 0.0444	D	T	CONVERGE	A
ROBO3	11	124744033	rs74787566	G	A	A 0.0146	T	D	CONVERGE	A
ROBO3	11	124744033	rs74787566	G	A	GA 0.0282	T	D	CONVERGE	A
SERPINA7	X	105279368	rs2234036	C	T	CT 0.0139	T	D	CONVERGE	A
SERPINE1	7	100771723	rs6090	G	A	A 0.0386	T	D	CONVERGE	A
SHH	7	155596114	rs104894047	C	T	CT 0.0138	T	D	CONVERGE	A
SIGLEC1	20	3673296	rs200137244	A	G	AG 0.0159	D	T	CONVERGE	A
SIGLEC1	20	3682126	rs34924243	C	T	CT 0.0115	D	T	CONVERGE	A
SIRPB1	20	1552430	rs2253427	T	C	TT 0.0417	D	T	CONVERGE	A
SMPDL3A	6	123122464	rs28385609	C	T	CT 0.0147	D	D	CONVERGE	A
SORBS3	8	22421982	rs3758036	C	T	T 0.0240	D	T	CONVERGE	A
SORBS3	8	22421982	rs3758036	C	T	CT 0.0459	D	T	CONVERGE	A
SPARCL1	4	88412806	rs1130643	T	C	CC 0.0182	T	D	CONVERGE	A
SPOCK2	10	73822855	rs2306322	C	T	CT 0.0134	D	T	CONVERGE	A
STAB1	3	52551973	rs77803411	C	T	TT 0.0123	T	D	CONVERGE	A
TENM4	11	78565314	rs17137261	C	G	G 0.0220	D	T	CONVERGE	A
TENM4	11	78565314	rs17137261	C	G	CG 0.0433	D	T	CONVERGE	A
THBS4	5	79361265	rs1866389	G	C	C 0.0366	D	D	CONVERGE	A
TJP1	15	30008977	rs2291166	T	G	G 0.0351	D	T	CONVERGE	A
TMEM119	12	108986017	rs73404789	G	A	A 0.0188	D	T	CONVERGE	A
TMEM119	12	108986017	rs73404789	G	A	GA 0.0371	D	T	CONVERGE	A
TMUB2	17	42267949	rs9895154	G	A	A 0.0172	D	T	CONVERGE	A
TMUB2	17	42267949	rs9895154	G	A	GA 0.0344	D	T	CONVERGE	A
TNFAIP3	6	138195991	rs146534657	A	G	G 0.0150	D	T	CONVERGE	A
TNFAIP3	6	138195991	rs146534657	A	G	AG 0.0289	D	T	CONVERGE	A
TNFRSF14	1	2491306	rs2234163	G	A	A 0.0328	T	D	CONVERGE	A
TNFRSF14	1	2494330	rs2234167	G	A	A 0.0172	T	D	CONVERGE	A
TNFRSF14	1	2494330	rs2234167	G	A	GA 0.0330	T	D	CONVERGE	A
TNFRSF8	1	12198362	rs144498730	C	A	CA 0.0104	D	T	CONVERGE	A
TNS2	12	53442956	rs12369033	G	C	CC 0.0200	D	D	CONVERGE	A
TNS4	17	38643384	rs140876567	C	A	A 0.0100	D	T	CONVERGE	A
TNS4	17	38643384	rs140876567	C	A	CA 0.0200	D	T	CONVERGE	A
TYK2	19	10469919	rs55882956	G	A	A 0.0180	D	T	CONVERGE	A
TYK2	19	10469919	rs55882956	G	A	GA 0.0355	D	T	CONVERGE	A
VIT	2	37035934	rs2072526	A	G	GG 0.0492	T	D	CONVERGE	A
WNK3	X	54275950	rs190471786	C	A	CA 0.0117	D	T	CONVERGE	A
YES1	18	745840	rs34580680	T	C	C 0.0101	T	D	CONVERGE	A
YES1	18	745840	rs34580680	T	C	TC 0.0202	T	D	CONVERGE	A
ZP4	1	238050801	rs35921460	G	A	A 0.0106	T	D	CONVERGE	A
ZP4	1	238050801	rs35921460	G	A	GA 0.0211	T	D	CONVERGE	A
ABCB1	7	87509343	rs2229107	A	T	T 0.0198	T	D	1000 Genome	B
ABCB1	7	87550493	rs2229109	C	T	T 0.0126	T	D	1000 Genome	B
ABCB1	7	87600124	rs9282564	T	C	C 0.0260	T	D	1000 Genome	B
ABCB1	7	87509343	rs2229107	A	T	AT 0.0363	T	D	1000 Genome	B
ABCB1	7	87550493	rs2229109	C	T	CT 0.0236	T	D	1000 Genome	B
ABCB1	7	87561309	rs36008564	T	C	TC 0.0124	T	D	1000 Genome	B
ABCB1	7	87600124	rs9282564	T	C	TC 0.0463	T	D	1000 Genome	B
ACE	17	63477099	rs558593002	G	T	GT 0.0116	D	T	1000 Genome	B
ACE	17	63480412	rs3730025	A	G	AG 0.0100	D	T	1000 Genome	B
ACE	17	63481590	rs35141294	C	T	CT 0.0144	D	T	1000 Genome	B
ACE2	X	15564175	rs41303171	T	C	TC 0.0118	T	D	1000 Genome	B
ADAL	15	43348983	rs77284705	A	G	G 0.0104	T	D	1000 Genome	B
ADAL	15	43348983	rs77284705	A	G	AG 0.0200	T	D	1000 Genome	B
ADAL	15	43351781	rs115809286	C	A	CA 0.0136	D	D	1000 Genome	B
AGT	1	230710231	rs4762	G	A	AA 0.0112	D	D	1000 Genome	B
AMPD1	1	114679616	rs34526199	T	A	A 0.0110	D	D	1000 Genome	B
AMPD1	1	114688633	rs61752479	G	A	A 0.0389	D	T	1000 Genome	B
AMPD1	1	114679616	rs34526199	T	A	TA 0.0204	D	D	1000 Genome	B
AMPD3	11	10482189	rs11042836	C	T	T 0.0230	D	T	1000 Genome	B
AMPD3	11	10495666	rs36003153	T	C	C 0.0238	T	D	1000 Genome	B
AMPD3	11	10482189	rs11042836	C	T	CT 0.0427	D	T	1000 Genome	B
AMPD3	11	10493476	rs61388455	G	A	GA 0.0128	T	D	1000 Genome	B
AMPD3	11	10493490	rs75286033	G	A	GA 0.0188	T	D	1000 Genome	B
AMPD3	11	10495666	rs36003153	T	C	TC 0.0411	T	D	1000 Genome	B
ANO1	11	70161664	rs2186797	T	C	C 0.0202	D	T	1000 Genome	B
ANO1	11	70161664	rs2186797	T	C	TC 0.0363	D	T	1000 Genome	B
BEST1	11	61956981	rs74653691	C	A	A 0.0124	D	D	1000 Genome	B
BEST1	11	61959966	rs1801390	C	T	T 0.0140	D	D	1000 Genome	B
BEST1	11	61962955	rs115979721	G	T	T 0.0214	D	D	1000 Genome	B
BEST1	11	61956981	rs74653691	C	A	CA 0.0232	D	D	1000 Genome	B
BEST1	11	61958429	rs2524295	G	A	GA 0.0108	D	D	1000 Genome	B
BEST1	11	61959966	rs1801390	C	T	CT 0.0280	D	D	1000 Genome	B
BEST1	11	61962628	rs111326315	G	A	GA 0.0160	T	D	1000 Genome	B
BEST1	11	61962955	rs115979721	G	T	GT 0.0403	D	D	1000 Genome	B
BEST1	11	61963081	rs17185413	T	C	CC 0.0220	D	D	1000 Genome	B
BEST2	19	12752615	rs79300835	G	A	A 0.0292	T	D	1000 Genome	B
BEST2	19	12754776	rs34896167	G	A	A 0.0174	D	D	1000 Genome	B
BEST2	19	12757736	rs61737519	C	T	T 0.0144	T	D	1000 Genome	B
BEST2	19	12754776	rs34896167	G	A	GA 0.0331	D	D	1000 Genome	B
BEST2	19	12757736	rs61737519	C	T	CT 0.0272	T	D	1000 Genome	B
BEST2	19	12758025	rs149797899	C	G	CG 0.0100	D	D	1000 Genome	B
BEST3	12	69643786	rs74102932	T	C	C 0.0451	T	D	1000 Genome	B
BEST3	12	69655049	rs17106884	T	C	C 0.0433	D	D	1000 Genome	B
BEST3	12	69676990	rs114061225	C	T	T 0.0120	T	D	1000 Genome	B
BEST3	12	69643740	rs61747221	G	A	AA 0.0252	D	D	1000 Genome	B
BEST3	12	69676990	rs114061225	C	T	CT 0.0232	T	D	1000 Genome	B
BEST4	1	44784335	rs59895800	C	G	GG 0.0280	T	D	1000 Genome	B
C4BPA	1	207113122	rs116810489	C	G	G 0.0102	D	T	1000 Genome	B
C4BPA	1	207113122	rs116810489	C	G	CG 0.0196	D	T	1000 Genome	B
C4BPA	1	207114195	rs533950846	A	C	AC 0.0120	D	T	1000 Genome	B
CD40	20	46128184	rs7273698	C	T	T 0.0471	D	D	1000 Genome	B
CD5	11	61125133	rs34209302	C	T	T 0.0415	D	T	1000 Genome	B
CD55	1	207340604	rs28738991	G	A	A 0.0371	D	T	1000 Genome	B
CDHR2	5	176578480	rs61743422	G	A	A 0.0106	D	T	1000 Genome	B
CDHR2	5	176584578	rs752138	T	C	C 0.0172	D	T	1000 Genome	B
CDHR2	5	176565369	rs114786529	T	C	TC 0.0156	D	T	1000 Genome	B
CDHR2	5	176578480	rs61743422	G	A	GA 0.0212	D	T	1000 Genome	B
CDHR2	5	176584578	rs752138	T	C	TC 0.0319	D	T	1000 Genome	B
CFTR	7	117587820	rs75789129	A	G	G 0.0112	T	D	1000 Genome	B
CFTR	7	117509089	rs115545701	C	T	CT 0.0100	T	D	1000 Genome	B
CFTR	7	117509093	rs1800076	G	A	GA 0.0128	D	D	1000 Genome	B
CFTR	7	117587820	rs75789129	A	G	AG 0.0216	T	D	1000 Genome	B
CLCN3	4	169660419	rs4692739	G	A	G 0.0252	T	D	1000 Genome	B
CLCN3	4	169660419	rs4692739	G	A	GA 0.0471	T	D	1000 Genome	B
CMA1	14	24507368	rs5247	T	C	TC 0.0168	D	D	1000 Genome	B
CR1	1	207609424	rs41274768	G	A	A 0.0132	D	T	1000 Genome	B
CR1	1	207609424	rs41274768	G	A	GA 0.0240	D	T	1000 Genome	B
DDX58	9	32481341	rs61752945	C	T	T 0.0114	D	T	1000 Genome	B
DDX58	9	32481341	rs61752945	C	T	CT 0.0220	D	T	1000 Genome	B
DPP10	2	115814893	rs76210053	G	A	GA 0.0168	D	T	1000 Genome	B
DPP4	2	162018839	rs1129599	C	G	G 0.0100	T	D	1000 Genome	B
DPP4	2	162018839	rs1129599	C	G	CG 0.0200	T	D	1000 Genome	B
DPP6	7	154053046	rs569787719	G	A	GA 0.0148	D	T	1000 Genome	B
DPP6	7	154587711	rs370428722	C	T	CT 0.0144	D	.	1000 Genome	B
DPP6	7	154587807	rs35392762	C	T	TT 0.0124	D	.	1000 Genome	B
DPP6	7	154587860	rs79320411	C	T	CT 0.0144	D	.	1000 Genome	B
DPP6	7	154588029	rs75213895	C	T	TT 0.0124	D	.	1000 Genome	B
DPP6	7	154588032	rs138763198	G	T	GT 0.0140	D	.	1000 Genome	B
DPP9	19	4682832	rs141294259	T	C	C 0.0136	D	T	1000 Genome	B
DPP9	19	4682832	rs141294259	T	C	TC 0.0248	D	T	1000 Genome	B
FAP	2	162218062	rs79793562	G	A	GA 0.0100	D	D	1000 Genome	B
GHRHR	7	30974060	rs28371560	G	A	A 0.0134	D	T	1000 Genome	B
GHRHR	7	30974060	rs28371560	G	A	GA 0.0244	D	T	1000 Genome	B
GSTA3	6	52902407	rs1052661	T	G	G 0.0387	D	T	1000 Genome	B
GSTA3	6	52902401	rs41273858	T	C	TC 0.0104	D	T	1000 Genome	B
IFITM3	11	320805	rs1136853	G	T	T 0.0393	D	T	1000 Genome	B
IFNA1	9	21440995	rs28383794	C	G	GG 0.0188	D	T	1000 Genome	B
IFNA2	9	21385313	rs35971916	G	T	T 0.0102	D	T	1000 Genome	B
IFNA2	9	21384817	rs77047588	C	T	CT 0.0124	D	T	1000 Genome	B
IFNA2	9	21385193	rs1061959	C	T	CT 0.0100	D	T	1000 Genome	B
IFNA2	9	21385313	rs35971916	G	T	GT 0.0196	D	T	1000 Genome	B
IFNAR2	21	33241945	rs2229207	T	C	CC 0.0136	D	T	1000 Genome	B
IFNB1	9	21077372	rs141894933	T	C	TC 0.0140	D	T	1000 Genome	B
IFNK	9	27524626	rs34933275	T	A	A 0.0228	D	T	1000 Genome	B
IFNK	9	27524626	rs34933275	T	A	TA 0.0447	D	T	1000 Genome	B
IL12B	5	159316780	rs3213119	C	A	A 0.0120	D	T	1000 Genome	B
IL12B	5	159316780	rs3213119	C	A	CA 0.0232	D	T	1000 Genome	B
IL19	1	206798962	rs76513170	A	C	AC 0.0104	D	T	1000 Genome	B
IL1A	2	112779574	rs3783581	C	T	CT 0.0112	D	T	1000 Genome	B
IL3	5	132060713	rs35415145	C	T	CT 0.0168	D	T	1000 Genome	B
IL33	9	6256144	rs16924241	C	G	G 0.0152	D	T	1000 Genome	B
IL33	9	6254544	rs35277373	C	G	CG 0.0108	D	T	1000 Genome	B
IL33	9	6256144	rs16924241	C	G	CG 0.0296	D	T	1000 Genome	B
IL7	8	78798167	rs201412253	C	T	T 0.0118	D	T	1000 Genome	B
IL7	8	78798167	rs201412253	C	T	CT 0.0212	D	T	1000 Genome	B
IRAK4	12	43783708	rs55944915	G	A	GA 0.0140	D	D	1000 Genome	B
ITGAX	16	31382471	rs4889652	C	G	G 0.0246	D	T	1000 Genome	B
ITGAX	16	31360353	rs2230428	G	A	AA 0.0120	T	D	1000 Genome	B
ITGAX	16	31382471	rs4889652	C	G	CG 0.0315	D	T	1000 Genome	B
KCNJ1	11	128840045	rs41302407	T	C	C 0.0168	T	D	1000 Genome	B
KCNJ1	11	128840045	rs41302407	T	C	TC 0.0288	T	D	1000 Genome	B
MAVS	20	3857752	rs11908032	T	A	A 0.0359	D	T	1000 Genome	B
MAVS	20	3857753	rs11905552	G	T	T 0.0359	D	T	1000 Genome	B
MTUS1	8	17755009	rs61733696	A	G	G 0.0317	D	T	1000 Genome	B
MTUS1	8	17755585	rs61733703	G	T	T 0.0114	D	T	1000 Genome	B
MTUS1	8	17755585	rs61733703	G	T	GT 0.0220	D	T	1000 Genome	B
MX1	21	41443804	rs62623435	G	A	GA 0.0140	D	T	1000 Genome	B
MX2	21	41380103	rs142234167	G	A	GA 0.0112	D	D	1000 Genome	B
NEDD4	15	55915910	rs73416291	G	A	A 0.0272	D	T	1000 Genome	B
NEDD4	15	55916265	rs113176671	A	C	C 0.0100	D	T	1000 Genome	B
NEDD4	15	55916735	rs1912403	T	C	C 0.0319	D	T	1000 Genome	B
NEDD4	15	55915613	rs62043855	T	G	GG 0.0463	D	T	1000 Genome	B
NEDD4	15	55915910	rs73416291	G	A	GA 0.0479	D	T	1000 Genome	B
NEDD4	15	55916265	rs113176671	A	C	AC 0.0200	D	T	1000 Genome	B
NEDD4	15	55916745	rs115484917	G	T	GT 0.0136	D	T	1000 Genome	B
NLRP3	1	247425556	rs35829419	C	A	A 0.0224	T	D	1000 Genome	B
NLRP3	1	247425556	rs35829419	C	A	CA 0.0415	T	D	1000 Genome	B
NMBR	6	142075653	rs7453944	G	T	TT 0.0152	D	T	1000 Genome	B
NMBR	6	142078883	rs138994608	G	T	GT 0.0156	D	T	1000 Genome	B
NPHS2	1	179557040	rs61747727	G	A	A 0.0206	D	D	1000 Genome	B
NPHS2	1	179557079	rs61747728	C	T	T 0.0146	T	D	1000 Genome	B
NPHS2	1	179557040	rs61747727	G	A	GA 0.0387	D	D	1000 Genome	B
NPHS2	1	179557079	rs61747728	C	T	CT 0.0268	T	D	1000 Genome	B
NPHS2	1	179575683	rs201050491	G	A	GA 0.0112	T	D	1000 Genome	B
PLAU	10	73911598	rs2227580	G	T	GT 0.0148	T	D	1000 Genome	B
PPM1A	14	60245872	rs201908822	G	C	GC 0.0100	D	T	1000 Genome	B
PREPL	2	44359567	rs78349078	T	A	TA 0.0128	D	.	1000 Genome	B
SCNN1A	12	6349184	rs5742912	A	G	G 0.0134	D	T	1000 Genome	B
SCNN1A	12	6349184	rs5742912	A	G	AG 0.0260	D	T	1000 Genome	B
SCNN1A	12	6363586	rs55797039	G	A	GA 0.0144	D	T	1000 Genome	B
SCNN1A	12	6374831	rs150809388	T	C	TC 0.0176	D	T	1000 Genome	B
SCNN1D	1	1287578	rs111819661	C	T	T 0.0120	D	T	1000 Genome	B
SCNN1D	1	1291471	rs61730205	C	T	T 0.0238	D	T	1000 Genome	B
SCNN1D	1	1287578	rs111819661	C	T	CT 0.0232	D	T	1000 Genome	B
SCNN1D	1	1291471	rs61730205	C	T	CT 0.0419	D	T	1000 Genome	B
SCNN1D	1	1291532	rs75063133	G	A	GA 0.0100	D	T	1000 Genome	B
SCNN1D	1	1291591	rs75670559	T	C	TC 0.0144	D	T	1000 Genome	B
SIGIRR	11	408174	rs117739035	G	T	T 0.0162	D	T	1000 Genome	B
SIGIRR	11	408174	rs117739035	G	T	GT 0.0323	D	T	1000 Genome	B
SLC10A2	13	103049340	rs56398830	G	A	GA 0.0148	D	T	1000 Genome	B
STOM	9	121341245	rs41273438	A	G	G 0.0194	D	D	1000 Genome	B
STOM	9	121341245	rs41273438	A	G	AG 0.0347	D	D	1000 Genome	B
STOML3	13	38972583	rs61744586	C	T	T 0.0365	T	D	1000 Genome	B
STOML3	13	38970199	rs116362041	C	T	CT 0.0160	D	D	1000 Genome	B
TICAM1	19	4818283	rs79591246	G	A	GA 0.0164	D	T	1000 Genome	B
TIRAP	11	126290931	rs8177399	C	T	CT 0.0112	D	T	1000 Genome	B
TLR1	4	38796634	rs5743621	G	A	A 0.0126	D	T	1000 Genome	B
TLR1	4	38797778	rs76796448	G	T	T 0.0230	D	T	1000 Genome	B
TLR1	4	38797918	rs3923647	T	A	A 0.0292	D	T	1000 Genome	B
TLR1	4	38798593	rs5743611	C	G	G 0.0226	D	T	1000 Genome	B
TLR1	4	38796634	rs5743621	G	A	GA 0.0236	D	T	1000 Genome	B
TLR1	4	38797778	rs76796448	G	T	GT 0.0451	D	T	1000 Genome	B
TLR1	4	38798593	rs5743611	C	G	CG 0.0379	D	T	1000 Genome	B
TLR10	4	38774018	rs11466658	G	A	A 0.0278	D	T	1000 Genome	B
TLR10	4	38774173	rs11466657	A	G	G 0.0186	D	T	1000 Genome	B
TLR10	4	38774173	rs11466657	A	G	AG 0.0339	D	T	1000 Genome	B
TLR10	4	38774614	rs11466653	A	G	GG 0.0148	D	D	1000 Genome	B
TLR10	4	38774699	rs11466651	C	T	TT 0.0152	T	D	1000 Genome	B
TLR2	4	153704799	rs5743704	C	A	CA 0.0184	D	T	1000 Genome	B
TLR2	4	153705165	rs5743708	G	A	GA 0.0128	D	T	1000 Genome	B
TLR4	9	117713324	rs4986791	C	T	T 0.0407	D	T	1000 Genome	B
TLR5	1	223112604	rs5744167	T	G	G 0.0204	D	T	1000 Genome	B
TLR5	1	223112604	rs5744167	T	G	TG 0.0367	D	T	1000 Genome	B
TLR5	1	223112698	rs5744166	G	C	GC 0.0176	T	D	1000 Genome	B
TLR6	4	38828893	rs5743809	A	G	G 0.0152	D	T	1000 Genome	B
TLR6	4	38827207	rs5743820	G	A	GA 0.0192	D	D	1000 Genome	B
TLR6	4	38828893	rs5743809	A	G	AG 0.0304	D	T	1000 Genome	B
TREH	11	118661667	rs147473566	A	G	AG 0.0180	D	T	1000 Genome	B
VCAM1	1	100738209	rs3783615	A	T	T 0.0226	D	T	1000 Genome	B
VCAM1	1	100738209	rs3783615	A	T	AT 0.0411	D	T	1000 Genome	B
ADA	20	43280227	rs73598374	C	T	CT 0.0180	T	D	CONVERGE	B
AGT	1	230845794	rs699	A	G	AA 0.0378	T	D	CONVERGE	B
AGTR2	X	115304224	rs3729977	T	C	TC 0.0132	D	T	CONVERGE	B
ANXA13	8	124710729	rs2294013	C	T	TT 0.0289	D	T	CONVERGE	B
BEST1	11	61725901	rs2524295	G	A	A 0.0130	D	D	CONVERGE	B
BEST1	11	61725901	rs2524295	G	A	GA 0.0257	D	D	CONVERGE	B
BEST1	11	61727485	rs17854138	C	T	CT 0.0183	D	D	CONVERGE	B
BEST3	12	70091452	rs1025016	A	G	AG 0.0139	D	D	CONVERGE	B
BEST4	1	45250007	rs59895800	C	G	GG 0.0444	T	D	CONVERGE	B
CD33	19	51728477	rs12459419	C	T	TT 0.0404	D	T	CONVERGE	B
CD5	11	60893235	rs2229177	C	T	CT 0.0102	D	T	CONVERGE	B
CFTR	7	117227874	rs75789129	A	G	G 0.0141	T	D	CONVERGE	B
CFTR	7	117227874	rs75789129	A	G	AG 0.0278	T	D	CONVERGE	B
DPP6	7	153750096	rs2533730	G	A	GA 0.0173	D	T	CONVERGE	B
GHRHR	7	31013675	rs28371560	G	A	A 0.0484	D	T	CONVERGE	B
IFNA8	9	21409584	rs3739630	G	A	A 0.0306	D	T	CONVERGE	B
IRF7	11	613208	rs1131665	T	C	C 0.0196	T	D	CONVERGE	B
IRF7	11	614318	rs1061502	T	C	C 0.0188	T	D	CONVERGE	B
IRF7	11	613208	rs1131665	T	C	TC 0.0369	T	D	CONVERGE	B
IRF7	11	614318	rs1061502	T	C	TC 0.0354	T	D	CONVERGE	B
MTUS1	8	17612518	rs61733696	A	G	G 0.0344	D	T	CONVERGE	B
MTUS1	8	17612526	rs138713013	C	T	T 0.0106	D	T	CONVERGE	B
MTUS1	8	17612526	rs138713013	C	T	CT 0.0211	D	T	CONVERGE	B
MX2	21	42749081	rs56680307	T	C	C 0.0203	T	D	CONVERGE	B
MX2	21	42749081	rs56680307	T	C	TC 0.0398	T	D	CONVERGE	B
PPM1A	14	60712590	14:60712590	G	C	GC 0.0119	D	T	CONVERGE	B
SCNN1D	1	1222958	rs111819661	C	T	T 0.0128	D	T	CONVERGE	B
SCNN1D	1	1222958	rs111819661	C	T	CT 0.0254	D	T	CONVERGE	B
TICAM1	19	4818295	rs79591246	G	A	A 0.0212	D	T	CONVERGE	B
TICAM1	19	4818295	rs79591246	G	A	GA 0.0418	D	T	CONVERGE	B
TLR1	4	38800022	rs117033348	A	G	AG 0.0128	D	T	CONVERGE	B
Group A: candidate proteins for COVID-19 inactivation or aging marker proteins in plasma
Group B: candidate genes for COVID-19 infection, morbidity and clearance
Chromosome position is based on hg37 for population CONVERGE
Chromosome position is based on hg38 for population 1000 genome

## Sheet: ST7
Supplementary Table 7. Candidate nonsynonymous eQTL mutations of candidate genes in two populations with allele or genotype frequency of 1-5%
Target_gene	Chr	Pos	SNP	Ref	Alt	Freq	eQTL_gene	SIFT_pred	FATHMM_pred	Population	Group
ABHD12	20	25278370	rs2228976	G	T	TT 0.0383	PYGB	D	D	1000 Genome	A
ABHD12	20	25282133	rs2227891	G	A	AA 0.0383	PYGB	T	D	1000 Genome	A
ABHD12	20	25476386	rs6115193	T	C	CC 0.0124	NINL	D	T	1000 Genome	A
ACP5	19	8936200	rs4804378	G	T	TT 0.0439	MUC16	D	T	1000 Genome	A
AGT	1	230710231	rs4762	G	A	AA 0.0112	AGT	D	D	1000 Genome	A
AGT	1	230759594	rs28359608	C	A	AA 0.0304	CAPN9	D	D	1000 Genome	A
ARF3	12	48330001	rs2291483	C	T	TT 0.0495	H1FNT	D	T	1000 Genome	A
ATP2A3 CCDC80	17	40799739	rs7209228	C	T	TT 0.0156	KRT28	D	D	1000 Genome	A
BPGM	7	134163505	rs17167553	G	T	TT 0.0399	LRGUK	D	T	1000 Genome	A
BUB1	2	110841381	rs1554005	C	T	TT 0.0367	ACOXL	D	D	1000 Genome	A
C2	6	31270250	rs41540117	C	A	AA 0.0276	HLA-C	D	T	1000 Genome	A
C9orf89	9	93113099	rs56145587	G	C	CC 0.0124	CARD19	D	.	1000 Genome	A
CCL16 SOCS7	17	40771762	rs9898164	A	G	GG 0.0272	KRT26	D	D	1000 Genome	A
CCL23	17	41515472	rs2305556	T	C	CC 0.0252	KRT15	T	D	1000 Genome	A
CD58	11	5454276	rs11037502	G	A	AA 0.0276	OR51I2	D	T	1000 Genome	A
CD79A FCAR	6	159249068	rs7763726	A	G	GG 0.0395	FNDC1	D	T	1000 Genome	A
CDH15	16	89546715	rs2292954	A	G	GG 0.0164	SPG7	T	D	1000 Genome	A
CHKB	22	50577409	rs3213445	T	C	CC 0.0463	CPT1B	T	D	1000 Genome	A
CSF2RB	22	36875840	rs2075939	T	C	TT 0.0375	NCF4	D	T	1000 Genome	A
CSRP2	12	77056010	rs310791	A	G	AA 0.0331	E2F7	T	D	1000 Genome	A
CTSD	11	5680051	rs3740996	G	A	AA 0.0160	TRIM5	T	D	1000 Genome	A
DDC	7	48271966	rs17712293	T	G	GG 0.0415	ABCA13	D	D	1000 Genome	A
DHFR	5	80654905	rs2001675	G	C	C 0.0208	MSH3	T	D	1000 Genome	A
DHFR	5	80654905	rs2001675	G	C	GC 0.0343	MSH3	T	D	1000 Genome	A
DHFR	5	80854162	rs184967	A	G	AA 0.0164	MSH3	T	D	1000 Genome	A
DPYSL3	5	149832947	rs11959820	C	A	AA 0.0144	PPARGC1B	D	T	1000 Genome	A
DYRK3	1	210404540	rs2294851	G	A	AA 0.0196	HHAT	D	T	1000 Genome	A
EFNB3	17	7559238	rs11552708	G	A	AA 0.0304	TNFSF13	T	D	1000 Genome	A
ENTPD1 FAM96A	15	65913866	rs3803414	G	A	A 0.0463	MEGF11	T	D	1000 Genome	A
ERBB4	8	124977407	rs10105106	G	A	AA 0.0140	ZNF572	D	T	1000 Genome	A
EREG	19	15087940	rs16980312	T	C	CC 0.0435	OR1I1	D	T	1000 Genome	A
ETNK1	12	21178615	rs4149056	T	C	CC 0.0116	SLCO1B1	D	T	1000 Genome	A
FAF2	2	166456941	rs11888208	T	C	CC 0.0212	SCN7A	T	D	1000 Genome	A
FAM134B	5	16673866	rs25901	C	G	CC 0.0435	MYO10	T	D	1000 Genome	A
FGF1	1	44759326	rs4342887	A	C	CC 0.0451	KIF2C	D	T	1000 Genome	A
FGF9	6	26092913	rs1800562	G	A	A 0.0126	HFE	D	D	1000 Genome	A
FGF9	6	26092913	rs1800562	G	A	GA 0.0236	HFE	D	D	1000 Genome	A
FKBP7	2	178856319	rs17362588	G	A	A 0.0357	CCDC141	D	T	1000 Genome	A
GAL	11	68433827	rs3736228	C	T	TT 0.0224	LRP5	T	D	1000 Genome	A
GPHA2	11	64224329	rs1059440	T	C	CC 0.0308	TRPT1	D	T	1000 Genome	A
HSD17B1	17	47283364	rs5918	T	C	CC 0.0128	ITGB3	T	D	1000 Genome	A
HSD17B14	19	45629998	rs7252175	G	A	AA 0.0204	EML2	D	T	1000 Genome	A
HSD17B14	19	45638587	rs12151009	T	C	CC 0.0128	EML2	D	T	1000 Genome	A
IGFBP7 KRT7	12	51890884	rs12368048	C	A	AA 0.0304	ANKRD33	D	T	1000 Genome	A
IL13	2	230172144	rs3948463	C	T	T 0.0395	SP110	T	D	1000 Genome	A
IL17RC	3	9835235	rs1057278	G	A	AA 0.0268	TTLL3	D	T	1000 Genome	A
INSR	19	8096566	rs3829817	C	T	TT 0.0391	FBN3	T	D	1000 Genome	A
ITM2B	13	46343334	rs2478046	G	A	AA 0.0128	RUBCNL	D	T	1000 Genome	A
LGMN	14	94382864	rs709932	C	T	TT 0.0371	SERPINA1	T	D	1000 Genome	A
LILRA5	19	53491548	rs10422163	A	T	TT 0.0192	ZNF813	D	T	1000 Genome	A
LRP8	1	53213557	rs1799822	A	G	GG 0.0156	CPT2	D	D	1000 Genome	A
LTBR	2	45413195	rs3755072	T	C	CC 0.0272	SRBD1	D	T	1000 Genome	A
MAPKAPK3	3	50559661	rs1034405	G	A	GG 0.0431	C3orf18	D	T	1000 Genome	A
MCEE	2	71124273	rs6748672	C	A	AA 0.0447	MCEE	D	T	1000 Genome	A
MED1	17	41422860	rs16966811	G	A	AA 0.0439	KRT37	D	D	1000 Genome	A
MICA	6	31410558	rs9380254	G	C	CC 0.0136	MICA	D	T	1000 Genome	A
MICB	6	30685004	rs9262143	C	T	T 0.0194	PPP1R18	D	T	1000 Genome	A
MICB	6	31507043	rs41293883	C	T	T 0.0487	MICB	D	T	1000 Genome	A
MICB	6	32293475	rs7775397	T	G	G 0.0194	TSBP1	D	T	1000 Genome	A
MICB	6	30685004	rs9262143	C	T	CT 0.0371	PPP1R18	D	T	1000 Genome	A
MICB	6	31154725	rs130075	C	T	TT 0.0120	CCHCR1	D	T	1000 Genome	A
MICB	6	31509904	rs1065076	A	G	AA 0.0427	MICB	D	T	1000 Genome	A
MICB	6	32293475	rs7775397	T	G	TG 0.0371	TSBP1	D	T	1000 Genome	A
MMEL1	1	153537414	rs3795393	T	C	CC 0.0148	S100A5	D	T	1000 Genome	A
MMP3 MMP10	15	41879285	rs1197682	G	A	AA 0.0204	SPTBN5	D	T	1000 Genome	A
MSR1	21	42389975	rs928302	C	T	TT 0.0180	TMPRSS3	T	D	1000 Genome	A
NBR1	17	48530596	rs12939811	T	A	AA 0.0156	HOXB1	D	D	1000 Genome	A
NCR3	6	32832635	rs1800454	C	T	TT 0.0228	TAP2	T	D	1000 Genome	A
NEFH	22	29490054	rs165602	A	C	CC 0.0184	NEFH	D	D	1000 Genome	A
NMB	15	84839914	rs3803403	C	G	GG 0.0300	ALPK3	D	T	1000 Genome	A
NMB	15	84840409	rs3803405	G	A	AA 0.0308	ALPK3	D	T	1000 Genome	A
NMB	15	84862764	rs187316	T	C	CC 0.0383	ALPK3	D	T	1000 Genome	A
NMT1	17	45983912	rs17651549	C	T	TT 0.0160	MAPT	D	T	1000 Genome	A
NPDC1	9	137022427	rs34039859	C	T	T 0.0319	ABCA2	T	D	1000 Genome	A
NPDC1	9	136474501	rs3812594	G	A	AA 0.0272	SEC16A	D	T	1000 Genome	A
NQO1	16	69714966	rs1131341	G	A	A 0.0214	NQO1	D	T	1000 Genome	A
NQO1	16	69714966	rs1131341	G	A	GA 0.0387	NQO1	D	T	1000 Genome	A
NTRK1	10	95058362	rs1058930	G	C	C 0.0166	CYP2C8	D	T	1000 Genome	A
NTRK1	10	95058362	rs1058930	G	C	GC 0.0315	CYP2C8	D	T	1000 Genome	A
OAS1	12	113844691	rs2075387	C	T	TT 0.0499	RBM19	D	T	1000 Genome	A
PAPPA2	9	132401620	rs3739916	C	T	T 0.0349	TTF1	D	T	1000 Genome	A
PLD3	19	35731956	rs16970649	C	T	TT 0.0148	KMT2B	D	D	1000 Genome	A
PPP3R1	2	68137346	rs13009282	T	C	CC 0.0284	WDR92	T	D	1000 Genome	A
PRIM1	12	56752285	rs2277339	T	G	GG 0.0268	PRIM1	D	T	1000 Genome	A
PRKAG1	12	48118548	rs11168414	C	T	TT 0.0232	PFKM	D	D	1000 Genome	A
PRPF6	20	63964194	rs6062599	C	T	TT 0.0120	ZNF512B	D	T	1000 Genome	A
PVRL4	15	29716773	rs2291166	T	G	G 0.0365	TJP1	D	T	1000 Genome	A
RBL1	20	35176751	rs867186	A	G	GG 0.0108	PROCR	D	T	1000 Genome	A
RND1	12	48202458	rs11168459	A	G	GG 0.0411	OR10AD1	D	T	1000 Genome	A
RNF215	22	30292670	rs4823086	C	T	T 0.0453	TBC1D10A	D	T	1000 Genome	A
ROBO3	11	123753950	rs12364099	G	T	TT 0.0120	OR6X1	D	T	1000 Genome	A
SCIN	3	111953978	rs3749298	C	T	TT 0.0116	PHLDB2	D	T	1000 Genome	A
SCIN	10	128108100	rs4750685	G	A	AA 0.0132	MKI67	D	T	1000 Genome	A
SERPIND1	22	25835345	rs17704912	G	C	C 0.0226	MYO18B	D	T	1000 Genome	A
SERPIND1	22	25835345	rs17704912	G	C	GC 0.0443	MYO18B	D	T	1000 Genome	A
SIGIRR	11	236091	rs28365927	G	A	AA 0.0407	SIRT3	D	T	1000 Genome	A
SIRPB1	20	1571784	rs2253427	T	C	TT 0.0379	SIRPB1	D	T	1000 Genome	A
STAB1	3	52395649	rs419752	C	T	T 0.0300	DNAH1	D	T	1000 Genome	A
TG	17	58360940	rs2680701	G	A	AA 0.0136	RNF43	D	T	1000 Genome	A
THBS4	5	80065442	rs1866389	G	C	CC 0.0232	THBS4	D	D	1000 Genome	A
TMEM119	12	108623488	rs7300972	T	C	CC 0.0280	SELPLG	D	T	1000 Genome	A
TNS4	17	40960476	rs17843021	G	A	AA 0.0168	KRT39	D	D	1000 Genome	A
UCMA	10	15607699	rs9333269	T	G	G 0.0325	ITGA8	D	T	1000 Genome	A
ACAP2	3	194338423	rs12695036	C	T	CC 0.0313	TMEM44	D	T	CONVERGE	A
AGT SPATA9	1	230845794	rs699	A	G	AA 0.0378	AGT	T	D	CONVERGE	A
ALDH3B1	11	66083129	rs3741367	T	C	CC 0.0427	CD248	T	D	CONVERGE	A
ARF3	12	48723784	rs2291483	C	T	TT 0.0156	H1FNT	D	T	CONVERGE	A
BIN1	2	128394955	rs11686946	A	G	GG 0.0437	MYO7B	D	D	CONVERGE	A
BUB1	2	111598958	rs1554005	C	T	TT 0.0244	ACOXL	D	D	CONVERGE	A
CD38	4	15688604	rs2302469	G	C	C 0.0297	FAM200B	D	T	CONVERGE	A
CD58	11	5475506	rs11037502	G	A	AA 0.0435	OR51I2	D	T	CONVERGE	A
CDH15	16	89613123	rs2292954	A	G	GG 0.0253	SPG7	T	D	CONVERGE	A
CHKB	22	51012775	rs2269383	C	T	TT 0.0237	CPT1B	D	D	CONVERGE	A
CHST3 SPOCK2	10	73767859	rs3740129	G	A	AA 0.0137	CHST3	T	D	CONVERGE	A
CTSD	11	5701281	rs3740996	G	A	AA 0.0405	TRIM5	T	D	CONVERGE	A
CTSS PRKAB2	1	150940625	rs267738	T	G	G 0.0303	CERS2	D	T	CONVERGE	A
CTSS PRKAB2	1	150958836	rs267733	A	G	G 0.0344	ANXA9	D	T	CONVERGE	A
DHFR	5	79950724	rs2001675	G	C	C 0.0103	MSH3	T	D	CONVERGE	A
DHFR	5	79950724	rs2001675	G	C	GC 0.0196	MSH3	T	D	CONVERGE	A
DPYSL3	5	149212510	rs11959820	C	A	AA 0.0188	PPARGC1B	D	T	CONVERGE	A
ENTPD1 FAM96A	15	66206204	rs3803414	G	A	A 0.0430	MEGF11	T	D	CONVERGE	A
EREG	19	15198751	rs16980312	T	C	CC 0.0456	OR1I1	D	T	CONVERGE	A
ERO1L	14	50092471	rs9989177	T	C	CC 0.0226	DNAAF2	D	T	CONVERGE	A
ETNK1	12	21331549	rs4149056	T	C	CC 0.0159	SLCO1B1	D	T	CONVERGE	A
FAF2	2	167313451	rs11888208	T	C	C 0.0217	SCN7A	T	D	CONVERGE	A
FAF2	2	167313451	rs11888208	T	C	TC 0.0420	SCN7A	T	D	CONVERGE	A
FAM3B	21	43824136	rs2277800	C	T	TT 0.0336	UBASH3A	D	T	CONVERGE	A
GAL	11	68201295	rs3736228	C	T	TT 0.0411	LRP5	T	D	CONVERGE	A
GALNT3	2	166797646	rs1432273	C	T	CC 0.0374	TTC21B	D	T	CONVERGE	A
GLIPR1	12	75900382	rs11540407	C	T	TT 0.0236	KRR1	D	T	CONVERGE	A
GPHA2	11	63991801	rs1059440	T	C	CC 0.0493	TRPT1	D	T	CONVERGE	A
HLA-DQA2	6	32486442	rs147669022	T	A	A 0.0208	HLA-DRB5	D	T	CONVERGE	A
HLA-DQA2	6	32489822	rs115417906	C	T	T 0.0192	HLA-DRB5	D	T	CONVERGE	A
HLA-DQA2	6	32552072	rs17879995	T	G	G 0.0330	HLA-DRB1	D	T	CONVERGE	A
HLA-DQA2	6	32486442	rs147669022	T	A	TA 0.0398	HLA-DRB5	D	T	CONVERGE	A
HLA-DQA2	6	32487424	rs141474277	C	A	CA 0.0104	HLA-DRB5	D	T	CONVERGE	A
HLA-DQA2	6	32489822	rs115417906	C	T	CT 0.0367	HLA-DRB5	D	T	CONVERGE	A
HLA-DQA2	6	32552039	rs150747106	C	T	TT 0.0110	HLA-DRB1	D	T	CONVERGE	A
HLA-DQA2	6	32629129	rs1130432	T	C	CC 0.0403	HLA-DQB1	D	T	CONVERGE	A
HSD17B1	17	45360730	rs5918	T	C	TC 0.0129	ITGB3	T	D	CONVERGE	A
HSD17B14	19	46133256	rs7252175	G	A	AA 0.0117	EML2	D	T	CONVERGE	A
HSD17B14	19	46141845	rs12151009	T	C	CC 0.0117	EML2	D	T	CONVERGE	A
HSP90B1	6	49439805	rs4267943	G	A	AA 0.0444	CENPQ	D	T	CONVERGE	A
IGFBP7 KRT7	12	52284668	rs12368048	C	A	AA 0.0272	ANKRD33	D	T	CONVERGE	A
IL17RC	3	9876919	rs1057278	G	A	A 0.0499	TTLL3	D	T	CONVERGE	A
INSR	19	8161450	rs3829817	C	T	TT 0.0243	FBN3	T	D	CONVERGE	A
JAKMIP3	10	131565170	rs2308327	A	G	AG 0.0163	MGMT	D	T	CONVERGE	A
KRT7	12	53186088	rs3887954	G	C	CC 0.0134	KRT3	D	D	CONVERGE	A
LGMN	14	94849201	rs709932	C	T	TT 0.0383	SERPINA1	T	D	CONVERGE	A
LMOD1	1	201869257	rs2820312	G	A	AA 0.0132	LMOD1	T	D	CONVERGE	A
LTBR	2	45640334	rs3755072	T	C	CC 0.0426	SRBD1	D	T	CONVERGE	A
MCEE	2	71351403	rs6748672	C	A	AA 0.0183	MCEE	D	T	CONVERGE	A
MICB	6	31474820	rs41293883	C	T	T 0.0380	MICB	D	T	CONVERGE	A
MICB	6	31477681	rs1065076	A	G	AA 0.0174	MICB	D	T	CONVERGE	A
MSR1	21	43810084	rs928302	C	T	TT 0.0440	TMPRSS3	T	D	CONVERGE	A
MST1R	3	49924940	rs1062633	T	C	CC 0.0284	MST1R	T	D	CONVERGE	A
NEFH	22	29886043	rs165602	A	C	C 0.0414	NEFH	D	D	CONVERGE	A
NELL2	12	45417666	rs2731038	T	C	TT 0.0298	DBX2	T	D	CONVERGE	A
NMB	15	85383145	rs3803403	C	G	GG 0.0212	ALPK3	D	T	CONVERGE	A
NMB	15	85383640	rs3803405	G	A	AA 0.0211	ALPK3	D	T	CONVERGE	A
NMB	15	85405995	rs187316	T	C	CC 0.0231	ALPK3	D	T	CONVERGE	A
NPDC1	9	139368953	rs3812594	G	A	A 0.0326	SEC16A	D	T	CONVERGE	A
NQO1	16	69748869	rs1131341	G	A	A 0.0196	NQO1	D	T	CONVERGE	A
NQO1	16	69748869	rs1131341	G	A	GA 0.0383	NQO1	D	T	CONVERGE	A
OAS1	12	113386779	rs2285933	C	G	GG 0.0286	OAS3	D	T	CONVERGE	A
OAS1	12	114282496	rs2075387	C	T	TT 0.0242	RBM19	D	T	CONVERGE	A
PPP3R1	2	68364478	rs13009282	T	C	CC 0.0199	WDR92	T	D	CONVERGE	A
PRIM1	12	57114307	rs2958127	A	T	AA 0.0425	NACA	D	T	CONVERGE	A
PRIM1	12	57146069	rs2277339	T	G	GG 0.0338	PRIM1	D	T	CONVERGE	A
PRPF6	20	62595547	rs6062599	C	T	T 0.0181	ZNF512B	D	T	CONVERGE	A
PRPF6	20	62595547	rs6062599	C	T	CT 0.0350	ZNF512B	D	T	CONVERGE	A
PRSS27	16	4445327	rs3747579	C	T	CC 0.0427	CORO7;CORO7-PAM16	D	T	CONVERGE	A
PTN	7	140244560	rs2293177	C	T	TT 0.0186	DENND2A	D	T	CONVERGE	A
PVRL4	15	30008977	rs2291166	T	G	G 0.0351	TJP1	D	T	CONVERGE	A
PVRL4	12	70091452	rs1025016	A	G	AG 0.0139	BEST3	D	D	CONVERGE	A
RCVRN	17	8700982	rs2242373	C	T	TT 0.0281	MFSD6L	D	D	CONVERGE	A
ROBO3	11	123624658	rs12364099	G	T	T 0.0154	OR6X1	D	T	CONVERGE	A
ROBO3	11	123624658	rs12364099	G	T	GT 0.0302	OR6X1	D	T	CONVERGE	A
SCIN	3	111672825	rs3749298	C	T	TT 0.0352	PHLDB2	D	T	CONVERGE	A
SCIN	10	129906364	rs4750685	G	A	AA 0.0247	MKI67	D	T	CONVERGE	A
SIGIRR	11	236091	rs28365927	G	A	AA 0.0149	SIRT3	D	T	CONVERGE	A
SIRPB1	20	1552430	rs2253427	T	C	TT 0.0417	SIRPB1	D	T	CONVERGE	A
SNAPIN	20	43739119	rs17422688	G	A	A 0.0327	WFDC5	D	T	CONVERGE	A
STAB1	3	52429665	rs419752	C	T	T 0.0191	DNAH1	D	T	CONVERGE	A
STAB1	3	52429665	rs419752	C	T	CT 0.0365	DNAH1	D	T	CONVERGE	A
TG	8	133092138	rs2403730	G	A	AA 0.0493	HHLA1	D	.	CONVERGE	A
THBS4	5	79361265	rs1866389	G	C	C 0.0366	THBS4	D	D	CONVERGE	A
TNFSF9	12	9985915	rs2232548	G	T	T 0.0377	KLRF1	D	T	CONVERGE	A
TNS4	17	39116728	rs17843021	G	A	AA 0.0204	KRT39	D	D	CONVERGE	A
TRAT1	3	108188993	rs9868484	G	A	GA 0.0148	MYH15	D	T	CONVERGE	A
WISP3	1	98165091	rs2297595	T	C	C 0.0135	DPYD	D	T	CONVERGE	A
WISP3	1	98165091	rs2297595	T	C	TC 0.0263	DPYD	D	T	CONVERGE	A
ZNF415	19	51584916	rs2569491	G	A	AA 0.0102	KLK14	T	D	CONVERGE	A
ZNF843	12	104048454	rs1609860	C	A	AA 0.0110	STAB2	D	T	CONVERGE	A
ADAL	15	43525206	rs12912505	G	A	AA 0.0196	MAP1A	D	T	1000 Genome	B
ADAL	15	43828361	rs678084	T	G	TT 0.0435	WDR76	T	D	1000 Genome	B
AGT	1	230710231	rs4762	G	A	AA 0.0112	AGT	D	D	1000 Genome	B
AGT	1	230759594	rs28359608	C	A	AA 0.0304	CAPN9	D	D	1000 Genome	B
AGTR2	11	6877264	rs2595453	T	C	C 0.0214	OR10A4	D	T	1000 Genome	B
AGTR2	11	6877264	rs2595453	T	C	TC 0.0395	OR10A4	D	T	1000 Genome	B
APEH	3	49684099	rs3197999	G	A	AA 0.0415	MST1	D	D	1000 Genome	B
APEH	3	50559661	rs1034405	G	A	GG 0.0431	C3orf18	D	T	1000 Genome	B
BEST4	1	44759326	rs4342887	A	C	CC 0.0451	KIF2C	D	T	1000 Genome	B
CD40	20	46043236	rs16985442	C	G	G 0.0220	SLC12A5	D	D	1000 Genome	B
CD40	20	46043236	rs16985442	C	G	CG 0.0423	SLC12A5	D	D	1000 Genome	B
DPP9	2	166456941	rs11888208	T	C	CC 0.0212	SCN7A	T	D	1000 Genome	B
GHSR	3	173117292	rs16846616	C	T	TT 0.0300	SPATA16	D	T	1000 Genome	B
GHSR	3	173117500	rs1515441	C	T	TT 0.0391	SPATA16	D	T	1000 Genome	B
IL13	2	230172144	rs3948463	C	T	T 0.0395	SP110	T	D	1000 Genome	B
IRAK4	12	48202458	rs11168459	A	G	GG 0.0411	OR10AD1	D	T	1000 Genome	B
ISYNA1	19	18193890	rs874628	A	G	GG 0.0351	MPV17L2	.	D	1000 Genome	B
LEP	10	119670121	rs2234962	T	C	CC 0.0164	BAG3	D	T	1000 Genome	B
MAS1	6	160249250	rs316019	A	C	AA 0.0220	SLC22A2	D	T	1000 Genome	B
NMB	15	84839914	rs3803403	C	G	GG 0.0300	ALPK3	D	T	1000 Genome	B
NMB	15	84840409	rs3803405	G	A	AA 0.0308	ALPK3	D	T	1000 Genome	B
NMB	15	84862764	rs187316	T	C	CC 0.0383	ALPK3	D	T	1000 Genome	B
SCNN1D	1	2562891	rs2234167	G	A	AA 0.0172	TNFRSF14	T	D	1000 Genome	B
SCNN1G	16	23069313	rs10083789	C	A	AA 0.0331	USP31	D	T	1000 Genome	B
SIGIRR	11	236091	rs28365927	G	A	AA 0.0407	SIRT3	D	T	1000 Genome	B
SLC9A1	16	1862020	rs1657125	T	G	GG 0.0355	MEIOB	D	T	1000 Genome	B
STOM	15	40382954	rs7164132	C	A	A 0.0437	KNSTRN	D	T	1000 Genome	B
AGT	1	230845794	rs699	A	G	AA 0.0378	AGT	T	D	CONVERGE	B
CECR1	22	17669306	rs2231495	T	C	CC 0.0226	ADA2	T	D	CONVERGE	B
CLCN3	4	169928842	rs2877380	G	T	G 0.0387	CBR4	T	D	CONVERGE	B
DPP9	2	167313451	rs11888208	T	C	C 0.0217	SCN7A	T	D	CONVERGE	B
DPP9	2	167313451	rs11888208	T	C	TC 0.0420	SCN7A	T	D	CONVERGE	B
ERLIN1	12	45417666	rs2731038	T	C	TT 0.0298	DBX2	T	D	CONVERGE	B
FRK	6	116446576	rs1064583	A	G	GG 0.0473	COL10A1	T	D	CONVERGE	B
ISYNA1	19	18304700	rs874628	A	G	GG 0.0116	MPV17L2	.	D	CONVERGE	B
LEP	12	70091452	rs1025016	A	G	AG 0.0139	BEST3	D	D	CONVERGE	B
MAS1	6	160670282	rs316019	A	C	AA 0.0133	SLC22A2	D	T	CONVERGE	B
NMB	15	85383145	rs3803403	C	G	GG 0.0212	ALPK3	D	T	CONVERGE	B
NMB	15	85383640	rs3803405	G	A	AA 0.0211	ALPK3	D	T	CONVERGE	B
NMB	15	85405995	rs187316	T	C	CC 0.0231	ALPK3	D	T	CONVERGE	B
SCNN1D	1	2494330	rs2234167	G	A	A 0.0172	TNFRSF14	T	D	CONVERGE	B
SCNN1D	1	2494330	rs2234167	G	A	GA 0.0330	TNFRSF14	T	D	CONVERGE	B
SCNN1G	16	23080634	rs10083789	C	A	A 0.0414	USP31	D	T	CONVERGE	B
SIGIRR	11	236091	rs28365927	G	A	AA 0.0149	SIRT3	D	T	CONVERGE	B
STOM	15	40675155	rs7164132	C	A	A 0.0313	KNSTRN	D	T	CONVERGE	B
Group A: candidate proteins for COVID-19 inactivation or aging marker proteins in plasma
Group B: candidate genes for COVID-19 infection, morbidity and clearance
Chromosome position is based on hg37 for population CONVERGE
Chromosome position is based on hg38 for population 1000 genome
